# Supplementary material for: Discovery of High-Affinity Amyloid Ligands Using a Ligand-Based Virtual Screening Pipeline
Source: PubMed Central journal article supplement (PMC10375536; doi:10.1021/jacs.3c03749), 2023-07-13
Supplement: ja3c03749_si_001.pdf [file ja3c03749_si_001.pdf]

# Discovery of high-affinity amyloid ligands using a ligand-based virtual screening pipeline

Timothy S. Chisholm,<sup>a</sup> Mark Mackey<sup>b</sup> and Christopher A. Hunter<sup>a,\*</sup>

<sup>a</sup> Yusuf Hamied Department of Chemistry, University of Cambridge, Lensfield Road, Cambridge CB2 1EW, UK. Email: herchelsmith.orgchem@ch.cam.ac.uk

<sup>b</sup> Cresset, New Cambridge House, Bassingbourn Road, Litlington SG8 0SS, Cambridgeshire, UK

## Supporting Information

## Contents

|                                                       |    |
|-------------------------------------------------------|----|
| Dataset Generation and Preparation .....              | 3  |
| Literature Search .....                               | 3  |
| 3D Conformation Hunt .....                            | 3  |
| Chemical Descriptors.....                             | 4  |
| Chemical Descriptor Model Development .....           | 4  |
| Regression Models .....                               | 4  |
| Classification Models.....                            | 4  |
| Model Scoring .....                                   | 4  |
| Nested Cross-Validation .....                         | 5  |
| Fitting the Final Model .....                         | 5  |
| 3D Model Development .....                            | 6  |
| Reference Template Generation .....                   | 6  |
| Compound Alignment and Partitioning.....              | 7  |
| Model Development.....                                | 7  |
| Feature Importance.....                               | 8  |
| Field QSAR Variance .....                             | 9  |
| Virtual Screening .....                               | 10 |
| ZINC15 Database and Molecular Property Filter .....   | 10 |
| Predicting Binding Affinities .....                   | 10 |
| Calculating Similarity .....                          | 11 |
| Materials and Instrumentation .....                   | 13 |
| A $\beta$ (1-42) Aggregation .....                    | 14 |
| Transmission Electron Microscopy.....                 | 14 |
| Circular Dichroism .....                              | 15 |
| In Vitro Binding Assays .....                         | 15 |
| General Procedure for Fluorescence Measurements ..... | 15 |
| Fluorescence Characterisation .....                   | 16 |
| Saturation Binding Assays .....                       | 17 |
| Competition Binding Assays .....                      | 18 |
| Fluorescence Anisotropy Assays .....                  | 18 |
| Ligand Dilution Series .....                          | 18 |
| Data Fitting .....                                    | 22 |
| References.....                                       | 22 |
| FBH Database .....                                    | 24 |
| Non-FBH Database .....                                | 41 |

# Experimental/Methods

## Dataset Generation and Preparation

### Literature Search

Protein-ligand binding data were acquired from literature searches using Web of Science and Google Scholar, and the PDBbind and ChEMBL online databases.<sup>1,2</sup> The requirements to be included in this database were 1) a chemical structure, and 2) an experimentally determined dissociation constant for binding to A $\beta$ (1-42) fibrils. A total of 707 unique ligands were found. Of these ligands, 44 had  $K_d$  values reported as limiting values (eg.  $K_d > 1 \mu\text{M}$ ). Binding measurements given as  $\text{IC}_{50}$  values were converted to  $K_d$  values where possible.

The dataset was refined by considering only datapoints corresponding to a common binding site. Ligands **1-4** have a common 6,5-fused benzoheterocycle (FBH) structural core and therefore likely target the same subset of binding sites. This subset of binding sites is referred to as the *FBH binding site*. Ligands **5-8** in Figure S1 also appear to target the same binding site. The dissociation constants of ligands **5-8** were similar when measured by (a) a direct binding assay, and (b) a competition binding assay against one of **1-4**. Of the A $\beta$ (1-42) data, 388 datapoints were found to correspond to the FBH binding site. Of this subset of the data, 361 datapoints had given values reported for binding constants, and 27 datapoints had limiting values reported for binding constants.

For ligands where multiple binding constants were reported, the average of these measurements were used. The log of all binding constants in  $\text{M}^{-1}$  were taken and the  $\log(K_d/M)$  values recorded. A binding class was assigned to each ligand based on this  $\log(K_d/M)$  value; class 0 for  $\log(K_d/M) \leq -8$ , class 1 for  $-8 < \log(K_d/M) \leq -7$ , class 2 for  $-7 < \log(K_d/M) \leq -6$ , and class 3 for  $-6 < \log(K_d/M)$ .

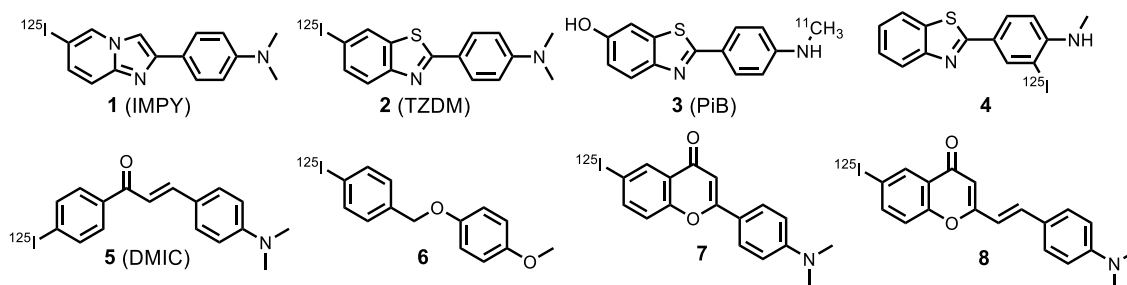

**Figure S1.** A $\beta$ (1-42) ligands which target the FBH binding site.

### 3D Conformation Hunt

Conformational hunts for all ligands in the FBH dataset were performed using the “Accurate but Slow” calculation method in Forge. For each ligand, 200 conformations were generated with a gradient cut-off of 0.100 kcal/mol/Å for conformer minimisation. Duplicate conformers were filtered at an RMS of 0.50 Å, and an energy window of 3.00 kcal/mol were used. No coulombic or attractive vdW forces were considered. Field points were then generated by Forge using the XED (eXtended Electron Distribution) molecular mechanics forcefield. Positive electrostatic, negative electrostatic, van der Waals, and hydrophobic field points were calculated. The XED force field uses several monopoles to generate a multipole description of the underlying force fields.

## Chemical Descriptors

Molecular descriptors were calculated using the Python cheminformatics toolkit RDKit.<sup>3</sup> A set of 45 molecular descriptors were calculated for each ligand using the *Descriptors*, *rdMolDescriptors*, *Lipinski*, and *Descriptors3D* modules of RDKit. Only descriptors calculated using the *Descriptors3D* module are dependent on molecular conformation. These descriptors describe computed experimental properties (eg. log*P*, molar refractivity), 1D compositional properties (eg. heavy atom counts, molecular weight, number of hydrogen bond donors), 2D topological properties (eg. topological polar surface area), and 3D conformational properties (eg. asphericity, eccentricity). The Pearson correlation coefficient was less than 0.9 for all pair-wise comparisons of the descriptors, indicating that they can be treated as independent variables.

Each set of descriptors *X* was standardised using Equation S1,

$$X' = \frac{X - \mu}{\sigma}, \quad \text{Eq.S1}$$

for the mean  $\mu$  and standard deviation  $\sigma$  across the dataset. This transformation centres the value of each descriptor around the mean with a unit standard deviation.

This collection of ligand-based features are referred to as “chemical descriptors” within this work.

## Chemical Descriptor Model Development

### Regression Models

Two baseline regression models were created. The first baseline model predicted the log(*K<sub>d</sub>*/*M*) of each ligand as the average log(*K<sub>d</sub>*/*M*) of the entire FBH dataset. The second baseline model randomly reallocated every log(*K<sub>d</sub>*/*M*) value to each ligand. The regression models studied were a random forest regressor, extra-trees regressor, X-gradient boosted regressor,<sup>4</sup> light-gradient boosted machine regressor,<sup>5</sup> gradient boosted regressor, ada-boost regressor,<sup>6</sup> histogram-based gradient boosted regressor, and a support vector machine regressor with a rbf kernel. These models were evaluated with the described nested cross validation procedure and scored using mean absolute error between the predicted and experimental log(*K<sub>d</sub>*/*M*) values.

### Classification Models

A baseline model that randomly reallocated the binding class between ligands was used. The classification models studied were a random forest classifier, X-gradient boosted classifier,<sup>4</sup> light gradient-boosted machine classifier,<sup>5</sup> a gradient boosted classifier, a histogram-based gradient boosted classifier, an ada-boosted classifier,<sup>6</sup> an extra-trees classifier, and a support vector machine classifier with a rbf kernel. These models were evaluated with the described nested cross validation procedure and scored using balanced accuracy.

### Model Scoring

Regression models were scored using the mean absolute error (MAE) between the experimental and predicted log(*K<sub>d</sub>*/*M*) values. MAE is calculated using Equation S2:

$$MAE = \frac{\sum_{i=1}^n |\log(K_{pred,i}/M) - \log(K_{exp,i}/M)|}{n}, \quad \text{Eq.S2}$$

Where log(*K<sub>pred,i</sub>*/*M*) is the predicted log(*K<sub>d</sub>*/*M*) of the *i*<sup>th</sup> ligand, log(*K<sub>exp,i</sub>*/*M*) is the experimentally measured log(*K<sub>d</sub>*/*M*) of the *i*<sup>th</sup> ligand, and *n* is the number of ligands.

All classification models were scored using the balanced accuracy, which is defined as the average of recall for each class. For a given class, the recall is defined in Equation S3 as

$$Recall = \frac{TP}{TP + FN}, \quad \text{Eq.S3}$$

where  $TP$  is the number of true positives, and  $FN$  is the number of false negatives. For a multiclassification problem, the balanced accuracy is defined in Equation S4 as

$$Balanced\ accuracy = \frac{\sum_{i=1}^n Recall_i}{n}, \quad \text{Eq.S4}$$

where  $Recall_i$  is the recall for the  $i^{th}$  class out of a total  $n$  classes.

#### *Nested Cross-Validation*

Nested cross-validation (CV) was used for hyperparameter optimisation and model evaluation. Both the outer and inner CV procedures used random  $k$ -fold cross validation ( $k = 5$ ).

The outer CV loop uses a random  $k$ -fold cross validation ( $k = 5$ ) procedure. Within each loop the inner CV loop is called using the outer CV training set and model hyperparameters are optimised. The outer test set is then used to evaluate model accuracy. Final model accuracy is the average model accuracy over the  $k$  folds.

The inner CV loop uses a  $k$ -fold cross validation ( $k = 5$ ) procedure to evaluate model accuracy while optimising hyperparameters using Optuna.<sup>7</sup>

Optuna suggests model hyperparameter values from a user-defined window which are then used to fit the inner CV training set. The inner CV test set is then used to evaluate model accuracy. Final model accuracy is the average model accuracy over the  $k$  folds. This procedure was repeated 200 times using new hyperparameter values suggested by Optuna with each iteration. The hyperparameters which produced the model with the highest accuracy were then passed to the outer CV loop for model evaluation.

#### *Fitting the Final Model*

To develop final models, a support vector machine regressor (rbf kernel) and random forest regressor were fitted by passing the entire dataset into the inner cross-validation procedure.

## 3D Model Development

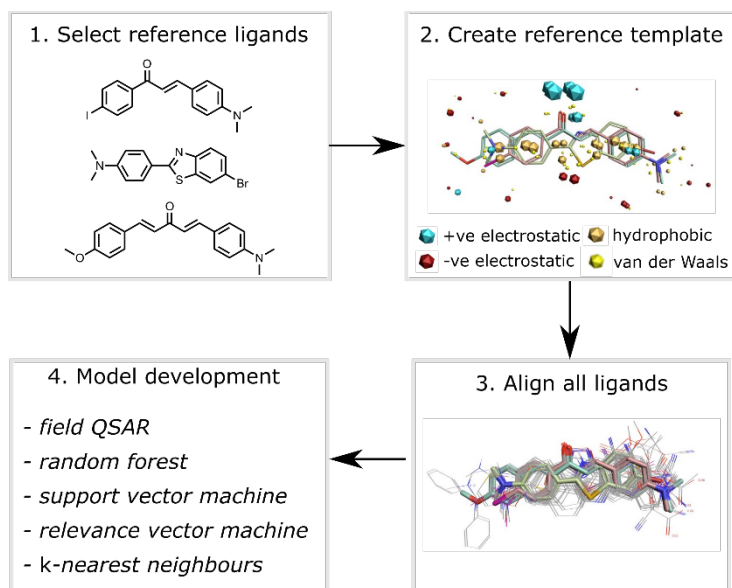

**Figure S2.** Model development using Forge. 1) High-affinity reference ligands were selected with representative structures. 2) A diverse set of conformations were generated for each reference ligand. Conformations of each ligand were aligned to one another based on similarity in their calculated field points and shape. Blue field points describe regions of negative electrostatic potential, red field points describe regions of positive electrostatic potential, orange field points describe regions with high hydrophobicity, and yellow field points describe van der Waals interactions. 3) Conformations of all other ligands in the dataset were generated and aligned to the reference template. 4) Quantitative structure activity relationship (QSAR) models were developed from the relationship between the field points and the experimentally measured  $\log(K_d/M)$  for each ligand.

### Reference Template Generation

The FieldTemplater module of Forge (Cresset Inc., UK) was used to generate reference templates for ligand alignment. The ligands **5**, **9**, **10**, and **11** were chosen as reference molecules due to (a) their low nanomolar binding affinities, and (b) their structural core being representative of a large part of the known dataset (Figure S3). A conformational hunt of these ligands was performed as above, combined with an alignment step that was scored by a 50:50 consideration of shape similarity and fieldpoint alignment between ligands. Templates were generated with a minimum of three molecules, a maximum number of 100 comparisons between pairs, a maximum score delta of 0.10 per pair, a minimum link density of 0.80, and duplicate templates were filtered at an RMS of 0.7 Å. Two templates were generated using this procedure: Template 1 was comprised of ligands **5**, **9**, and **10** in their lowest energy conformation with a field similarity score of 0.710, a shape similarity score of 0.806, and an overall similarity score of 0.758. Template 2 was comprised of ligands **5**, **9**, **10**, and **11**, with all ligands in their lowest energy conformation aside from ligand **11** which occupied its 17<sup>th</sup>-lowest energy conformation. This template had a field similarity score of 0.626, a shape similarity score of 0.749, and an overall similarity score of 0.687.

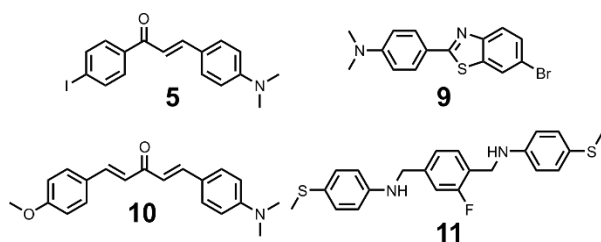

**Figure S3.** Structures of the reference ligands used for Forge model development.

#### *Compound Alignment and Partitioning*

Compound alignment to each reference template was performed using a “Normal” calculation method in Forge. A maximum scoring method was used to align ligands to the templates containing multiple reference compounds. Alignment was scored by a 50/50 weighting of shape similarity and field point alignment. Once alignments were generated they were manually verified. Ligands that failed to align were discarded from the dataset. The remaining ligands were then partitioned into training and test set compounds in approximately a 4:1 ratio (Template 1: 169 training and 43 test set compounds; Template 2: 176 training and 46 test set compounds). This partitioning was activity-stratified and performed manually to ensure each structural class was represented in both datasets.

#### *Model Development*

Five models were created for each template.

##### **1. Field QSAR Model**

Field quantitative structure-activity relationship (QSAR) models were created using a “Normal” calculation method in Forge. A maximum of 20 model components were allowed, with a sample point minimum distance of 1.0 Å and 50 Y scrambles. Leave-one-out CV was used for model evaluation.

##### **2. k-Nearest Neighbour (kNN)**

kNN models were created with a maximum of 20 neighbours, and using molecular fields as the measure of similarity with 50% of this similarity coming from the shape of the ligand.

##### **3. Random Forest (RF)**

RF models were built using 1000 trees, a feature subsampling fraction of 0.33, and a minimum of 5 samples per leaf. A sample point minimum distance of 1.0 Å was used. Both electrostatic and volume fields were used for model development. The generalisation error is calculated as a cross-validated coefficient of determination ( $q^2$ ) based on *out-of-bag* scores. These scores are calculated for a particular molecule by computing the average prediction from trees not trained using that molecule.

##### **4. Support Vector Machine (SVM)**

SVM models were built with a sample point minimum distance of 1.0 Å. For cross-validation, 5 folds were used in *k*-fold CV to calculate a cross-validated coefficient of determination ( $q^2$ ). A maximum of 50 optimiser iterations were allowed with a time limit of 60 min for global optimisation. A gamma between  $10^{-5}$  and  $10^{-1}$  was allowed, and a C between  $10^{-1}$  and  $10^3$ , and an epsilon between  $10^{-4}$  and 1. Both electrostatic and volume fields were used for model development.

## 5. Relevance Vector Machine (RVM)

RVM models were built with a sample point minimum distance of 1.0 Å. For cross-validation, 5 folds were used in  $k$ -fold CV to calculate a cross-validated coefficient of determination ( $q^2$ ). A maximum of 50 optimiser iterations were allowed with a time limit of 60 min for global optimisation, and a gamma between  $10^{-5}$  and  $10^{-1}$  allowed. Both electrostatic and volume fields were used for model development.

### Feature Importance

The feature importance of each descriptor included in the final random forest model was computed (Figure S4).

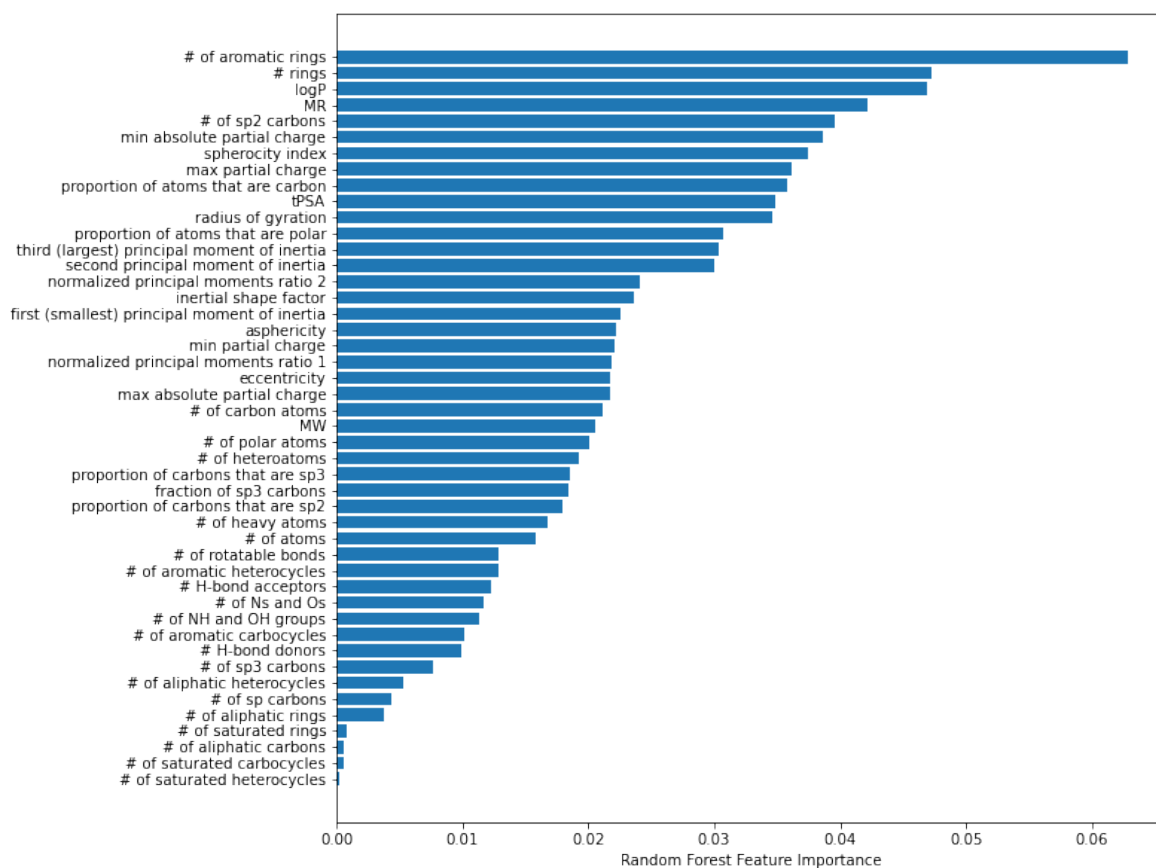

**Figure S4.** The feature importance of each descriptor included in the random forest regressor model.



Field QSAR Variance

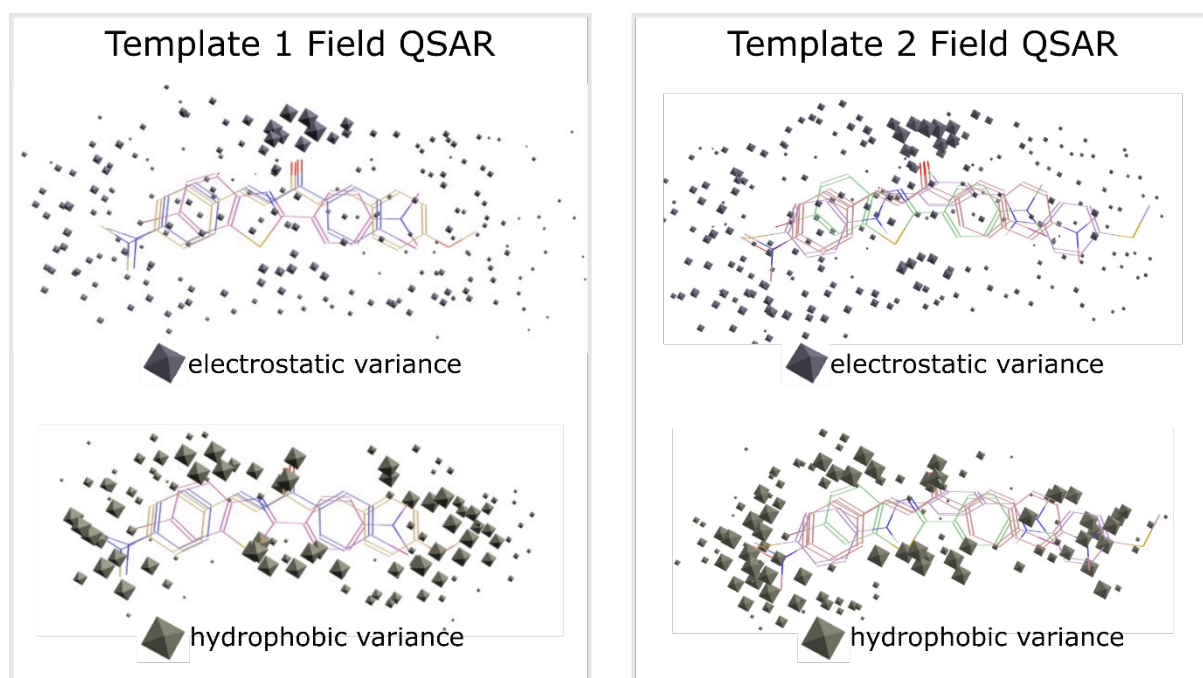

**Figure S5.** Variance in the model coefficients of Field QSAR models for each template.

## Virtual Screening

### ZINC15 Database and Molecular Property Filter

Tranches of compounds with 3D conformations were downloaded from the ZINC15 database corresponding to molecules that (a) were neutrally charged, (b) had a molecular weight between 200 and 500 Da, and (c) had *clogP* values between 3.5 and 5.5.<sup>8</sup> These tranches corresponded to 63 million ligands. Chemical descriptors were calculated for these compounds as described above.

### Predicting Binding Affinities

The  $\log(K_{pred}/M)$  of the 63 million ligands from the ZINC15 database were predicted using the final support vector machine regressor (rbf kernel) model. The top 10,000 ligands were then screened using Forge 3D models.

Four 3D models developed using Forge were used: the Field QSAR and RF models from Template 1, and the Field QSAR and SVM models from Template 2. Each of these models were used to predict the binding affinity of the 10,000 ligands passed from the chemical descriptor model. These 3D models predicted a broader range of  $-\log(K_d/M)$  values compared to the SVM Chemical Descriptor model (Figure S6). The Field QSAR models predict a wider distribution of  $-\log(K_d/M)$  compared to the RF and SVM models.

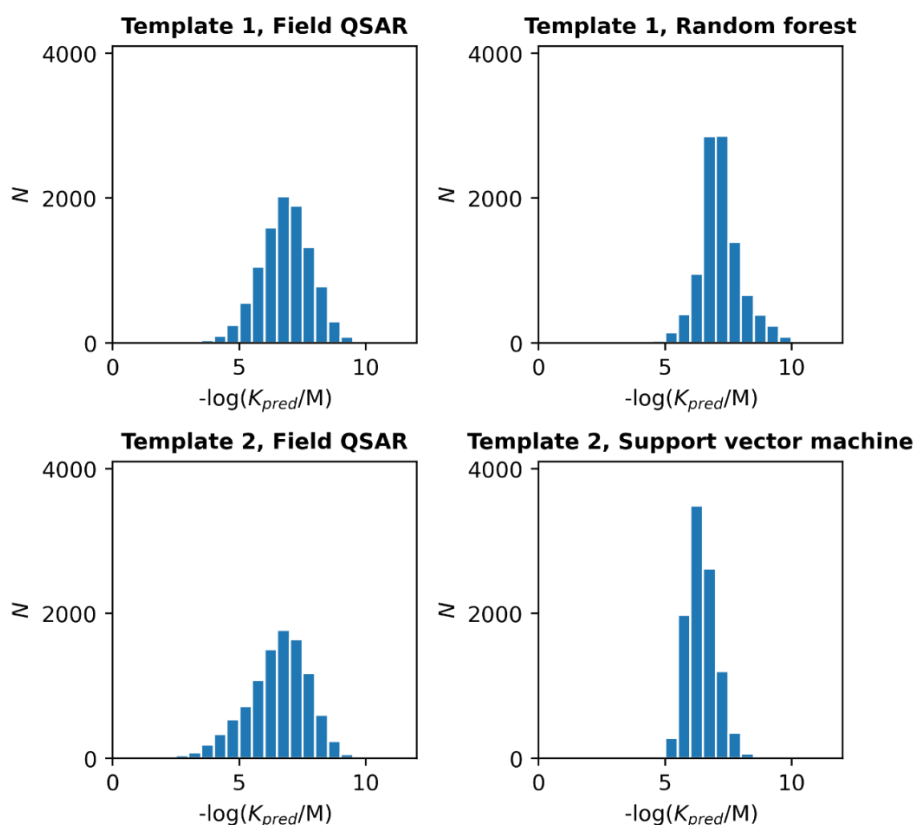

**Figure S6.** The predicted  $\log(K_d/M)$  values for the 10,000 top-ranked Chemical Descriptor ligands screened through each 3D model.

The Field QSAR models calculated a “Distance to the model” score. This score is a measure of how well the field points of the screened ligand are represented in the trained model. If the screened ligand has many field points that were not found in the data used to create the model, then the model will be

unreliable for predicting ligand activity. Only ligands with a “Good” or “Excellent” distance to model score were therefore considered further.

The predicted affinity for the screened ligands were averaged between the two molecules for each template (ie. The predicted ligand affinity from the Template 1 Field QSAR and Template 1 RF models were averaged, and the predicted ligand affinity from the Template 2 Field QSAR and Template 2 SVM models were averaged). The two resultant rankings were then score-fused, and the top 25 predicted ligands from each template were purchased from Enamine (Ukraine) for screening. Of these ligands, 46 were successfully synthesised by Enamine (Ukraine) (Figure S7).

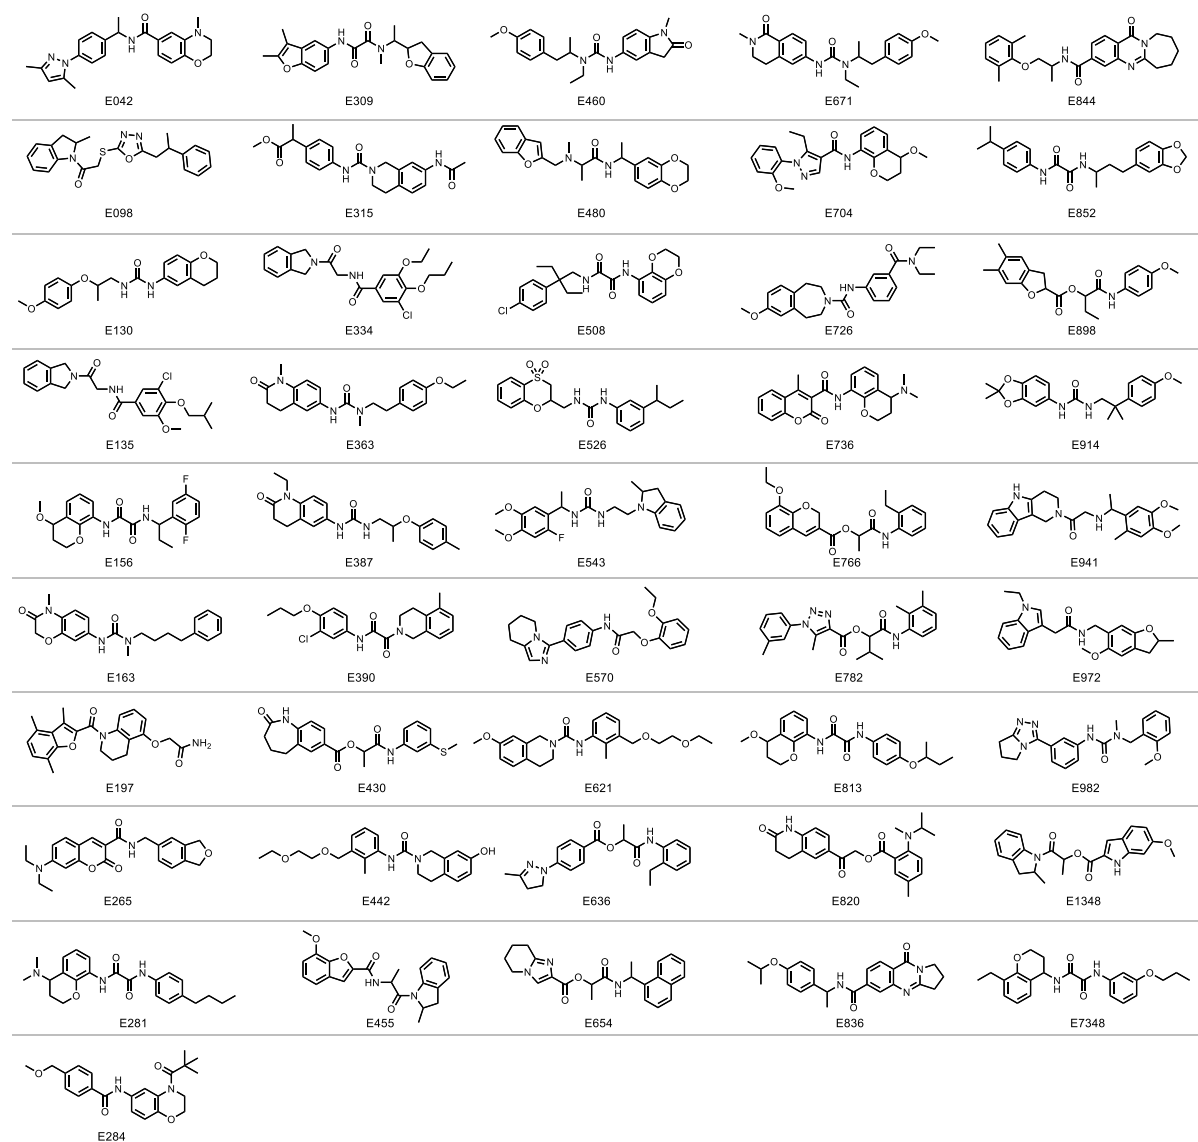

**Figure S7.** The 46 compounds purchased for experimental screening.

### Calculating Similarity

RDKit fingerprints were calculated for **E163**, **E197**, **E363**, **E570**, and **E704**, and the FBH ligand database. Tanimoto and Dice similarity coefficients were then calculated between each of **E163**, **E197**, **E363**, **E570**, and **E704**, and the FBH ligand database.<sup>9–12</sup> Plots of the calculated similarity coefficients are shown in Figure S8. The most similar pairs are shown in Figure S9, with calculated similarity coefficients in Table S1.

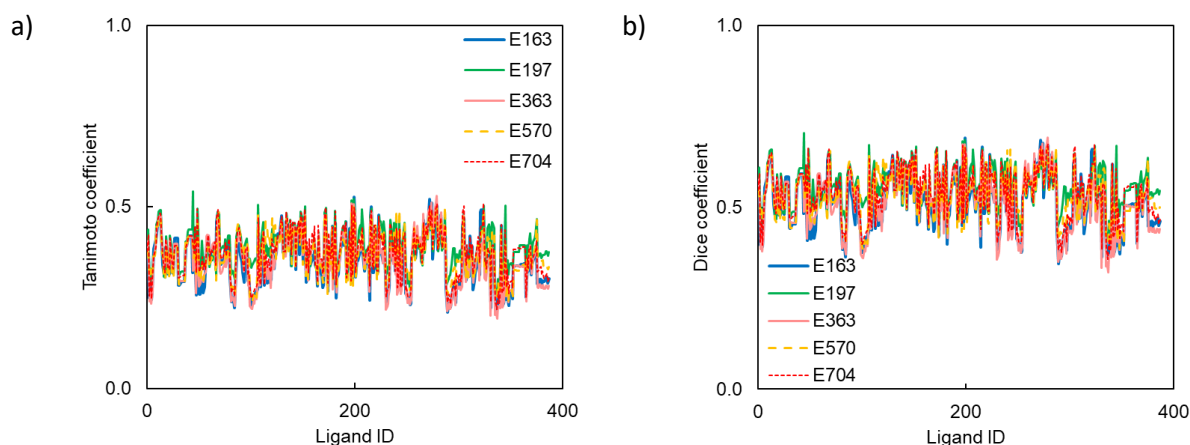

**Figure S8.** The calculated (a) Tanimoto similarity coefficients and (b) Dice similarity coefficients between **E163**, **E197**, **E363**, **E570**, and **E704**, and each ligand in the FBH database. RDKit fingerprints were used for similarity calculations.

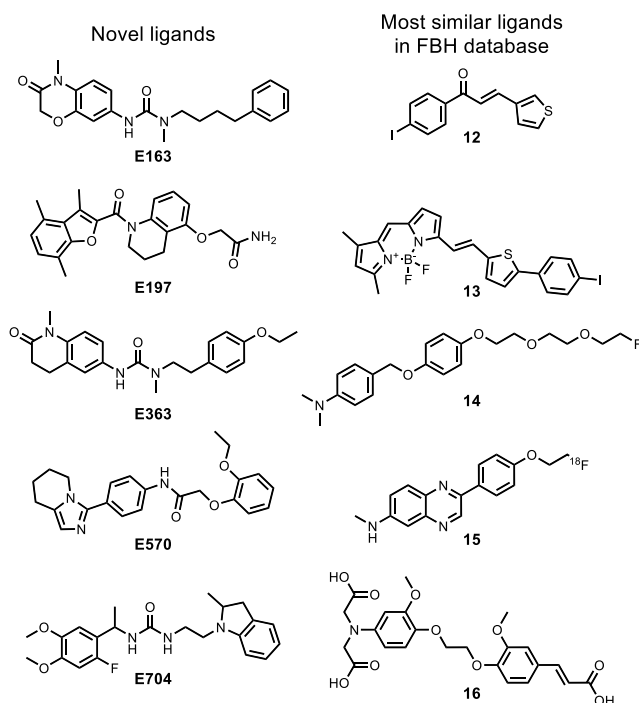

**Figure S9.** The chemical structures of the ligands in the FBH database with the highest Tanimoto and Dice similarity coefficients to each of the novel ligands discovered. The ligands with the highest Tanimoto coefficients also had the highest Dice coefficients.

**Table S1.** The calculated Tanimoto and Dice coefficients for the pairs shown in Figure S9.

|                                 | <b>E163 and 12</b> | <b>E197 and 13</b> | <b>E363 and 14</b> | <b>E570 and 15</b> | <b>E704 and 16</b> |
|---------------------------------|--------------------|--------------------|--------------------|--------------------|--------------------|
| Tanimoto similarity coefficient | 0.53               | 0.54               | 0.53               | 0.50               | 0.51               |
| Dice similarity coefficient     | 0.69               | 0.70               | 0.69               | 0.67               | 0.68               |

## Materials and Instrumentation

All solvents and chemicals were obtained from commercial sources and used without further purification unless otherwise stated. Protein LoBind (Eppendorf) microtubes were used for preparing and storing all solutions containing A $\beta$ (1-42). Low retention pipette tips were used for all fluid handling. Ligands used for experimental screening were purchased from Enamine (Ukraine).

### 2-(4-(dimethylamino)phenyl)-3,6-dimethylbenzo[d]thiazol-3-ium chloride (Thioflavin T, ThT)

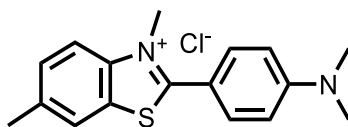

Thioflavin T (1.13 g, 3.54 mmol) was purchased from Sigma Aldrich as the chloride salt with dye content  $\geq 65\%$ . Thioflavin T was recrystallised twice from hot water prior to use (0.531 g, 1.67 mmol, 47%).

$^1\text{H NMR}$  (400 MHz,  $\text{CDCl}_3$ ),  $\delta$ (ppm): 8.05 – 7.97 (m, 2H), 7.86 (d,  $J = 8.5$  Hz, 2H), 7.53 (d,  $J = 8.5$  Hz, 1H), 6.82 (d,  $J = 8.4$  Hz, 2H), 4.55 (s, 3H), 3.12 (s, 6H), 2.49 (s, 3H).

$^{13}\text{C NMR}$  (101 MHz,  $\text{CDCl}_3$ )  $\delta$ (ppm): 172.57, 163.88, 154.15, 141.00, 139.09, 132.78, 131.27, 128.25, 123.44, 116.73, 112.40, 111.00, 77.48, 77.16, 76.84, 40.28, 39.65, 21.64.

HRMS (ESI+): 283.1265 m/z: Calculated for  $\text{C}_{17}\text{H}_{19}\text{N}_2\text{S}^+$  = 283.1269 [M] $^+$ .

IR (ATR,  $\text{cm}^{-1}$ ): 3403, 1604, 1501, 1480, 1441, 1387, 1350, 1233, 1212, 1158, 827.

MP: 195.5-196.5  $^\circ\text{C}$

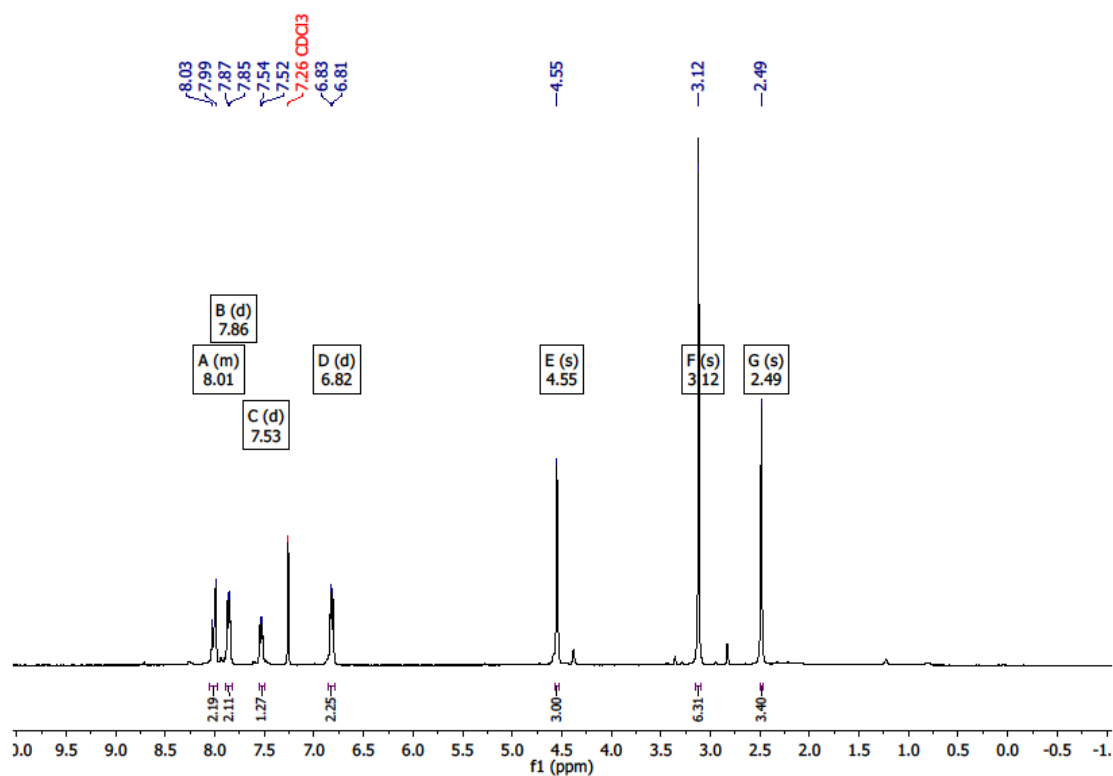

Figure S10:  $^1\text{H NMR}$  spectra of ThT.

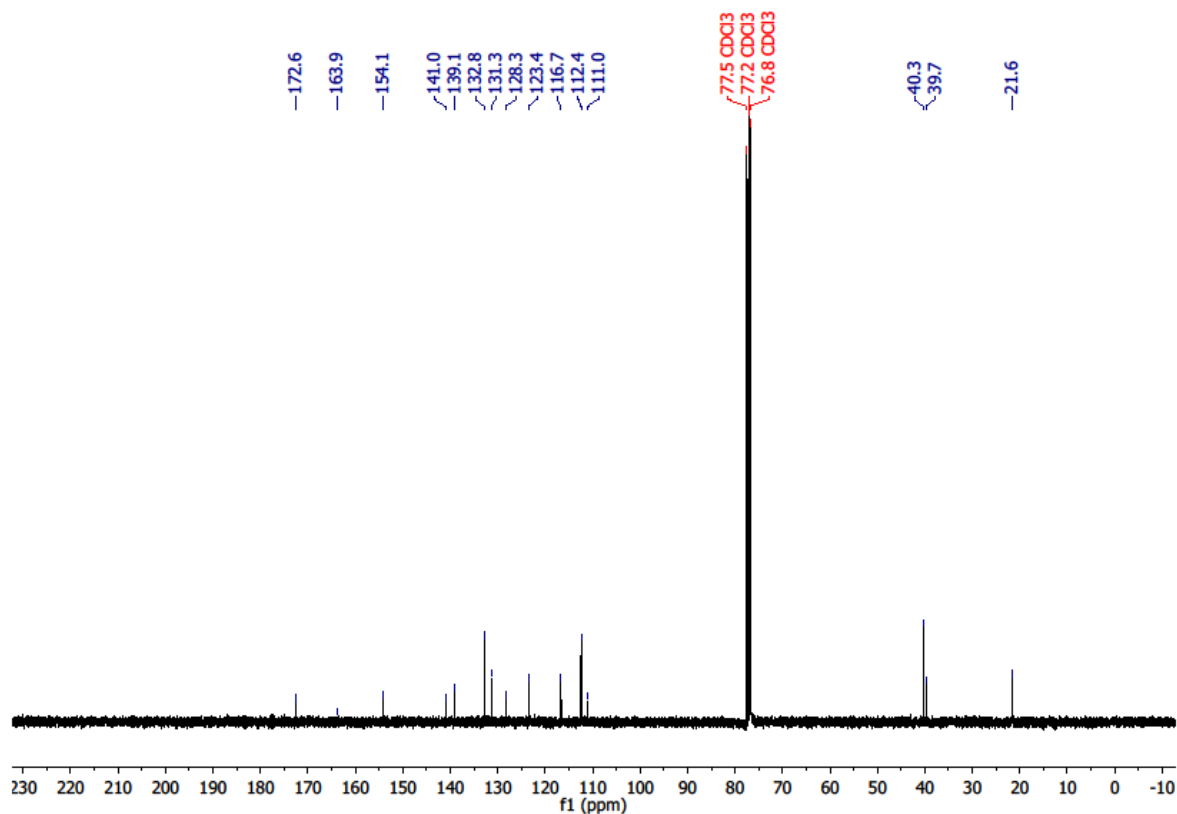

**Figure S11:**  $^{13}\text{C}$  NMR spectra of ThT.

### ***A $\beta$ (1-42)* Aggregation**

Preparation and aggregation of A $\beta$ (1-42) was performed based on standard literature procedures.<sup>13,14</sup> Monomeric A $\beta$ (1-42) (1 mg; Rockland Immunochemicals, Limerick, PA, Lot #31541) was dissolved in 2 mM NaOH (1 mg/mL) on ice and gently agitated until the lyophilisate was wetted. The monomer was then left for 3 min to dissolve and a homogeneous appearance of the solution was achieved. The solution was then sonicated for 1 min, added to an Amicon Ultra-15 Centrifugal filter (30 kDa MWCO), and centrifuged (30 min, 4000 x g, 4 °C). The filter was washed with 2 mM NaOH (1 mL) and centrifuged (30 min, 4000 x g, 4 °C). The combined filtrates were kept on ice and gently rotated to homogenise the mixture. The absorbance at 280 nm was then measured ( $\epsilon = 1440 \text{ M}^{-1} \text{ cm}^{-1}$ ) to determine the concentration of the solution (165  $\mu\text{M}$ ). The solution was then added to 2xPBS (2 mL, pH 7.1) to afford a final stock solution in 1xPBS (pH 7.4). This solution was then incubated at 37 °C for 72 h with agitation using a magnetic stir bar. Aliquots were then taken and stored at -78 °C until use.

### *Transmission Electron Microscopy*

Nanoscale morphologies of fibril samples were observed by TEM using a Thermo Scientific (FEI Company) Talos F200X G2 microscope operating at 200 kV (Figure S12). Images were recorded with a Ceta 4k x 4k CMOS camera. For sample preparation, TEM grids (continuous carbon film on 300 mesh Cu) were glow discharged using a Quorum Technologies GloQube at 25 mA for 60 s. A 2  $\mu\text{L}$  sample of fibril in 1xPBS (1  $\mu\text{M}$  A $\beta$ (1-42)) was placed on a freshly glow-discharged grid, and after 1 min was carefully removed by blotting with filter paper. The sample was negatively stained using 2.0  $\mu\text{L}$  of 2% (w/v) uranyl acetate solution in ethanol for 30 s. The grid was blotted and dried in air for 10 min at room temperature before use.

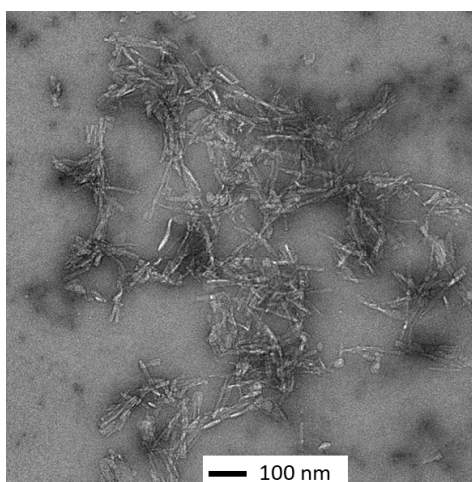

**Figure S12.** Representative TEM micrograph of the A $\beta$ (1-42) fibrils used.

### *Circular Dichroism*

CD spectra of A $\beta$ (1-42) in 1xPBS (pH 7.4) were recorded with a Chirascan CD1 Spectrometer (Applied Photonics Ltd.) equipped with a Series 800 Temperature Controller (Alpha Omega Instruments) (Figure S13). Far-ultraviolet measurements (190 nm - 250 nm) of A $\beta$ (1-42) (1.0  $\mu$ M) in 1xPBS (pH 7.4) were recorded at 25 °C with a 10 mm optical pathlength, a time-per-point of 1.0 s, and a wavelength step of 0.1 nm. CD spectra were averaged over six scans. Data were baseline corrected by subtracting the complete buffer spectrum of 1xPBS (pH 7.4) averaged over six scans. Applied Photophysics Pro-Data Chirascan software was then used to smooth the data using Savitsky-Golay smoothing and a window size of eight, then used to convert the data to molar ellipticity.

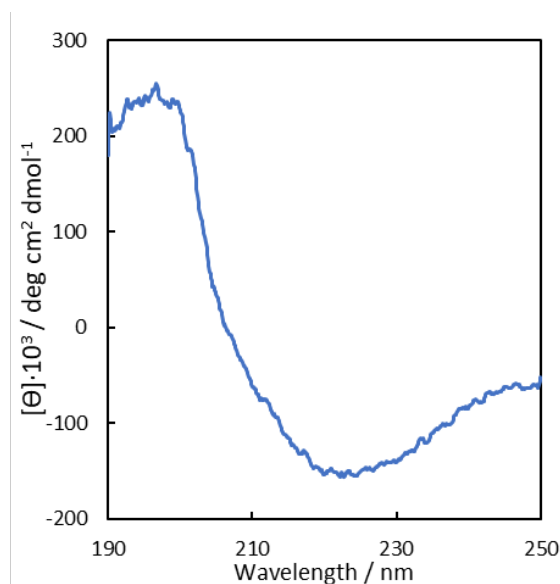

**Figure S13.** CD spectra of A $\beta$ (1-42) (1.0  $\mu$ M) in 1xPBS (pH 7.4, 298 K).

### ***In Vitro Binding Assays***

#### *General Procedure for Fluorescence Measurements*

Fluorescence spectroscopic data were measured using a Cary Eclipse Fluorescence Spectrophotometer G9800A (Agilent) controlled by Cary Eclipse software. Fluorescence excitation experiments were performed using 20 nm excitation and emission slits, a scan rate of 600 nm/min, a

data interval of 1.0 nm, an averaging time of 0.10, and medium PMT voltage at 25°C. Experiments detecting ThT used  $\lambda_{\text{ex}} = 440$  nm, and measured emissions from  $\lambda_{\text{em}} = 470 - 600$  nm. Stock solutions of all ligands were prepared in DMSO (1 mM). Stock solutions of A $\beta$ (1-42) fibrils (10  $\mu\text{M}$ ) were prepared in 1xPBS (pH 7.4). Titration solutions were prepared by dilution of the corresponding stock solutions using 1xPBS (pH 7.4).

Fluorescence anisotropy experiments were performed using 10 nm excitation and emission slits, a scan rate of 120 nm/min, a data interval of 1.0 nm, an averaging time of 0.5 s, and medium PMT voltage at 25°C.

#### Fluorescence Characterisation

A stock solution of ligand was prepared in pure DMSO (1 mM). Dilutions of the ligand (10  $\mu\text{M}$ ) were then prepared in 1xPBS (pH 7.4), optionally containing A $\beta$ (1-42) fibril (10  $\mu\text{M}$ ) as prepared above. Fluorescence spectra were then taken at 298 K.

Two fluorescent coumarins, **E265** and **E736**, were identified from VS. The coumarin **E265** exhibited similar excitation and emission wavelengths to ThT, while the fluorescence spectra of **E736** was more blue shifted (Table S1). Neither coumarin experienced a significant enhancement in fluorescence upon addition to A $\beta$ (1-42) fibrils, nor a significant solvatochromic shift.

**Table S2.** Fluorescence excitation and emission maxima found for ThT, **E265**, and **E736**.

|             | $\lambda_{\text{ex, free}}$ | $\lambda_{\text{em, free}}$ | $\lambda_{\text{ex, A}\beta(1-42)}$ | $\lambda_{\text{em, A}\beta(1-42)}$ |
|-------------|-----------------------------|-----------------------------|-------------------------------------|-------------------------------------|
| <b>ThT</b>  | 346 nm                      | 506 nm                      | 440 nm                              | 487 nm                              |
| <b>E265</b> | 425 nm                      | 480 nm                      | 425 nm                              | 475 nm                              |
| <b>E736</b> | 333 nm                      | 422 nm                      | 333 nm                              | 415 nm                              |

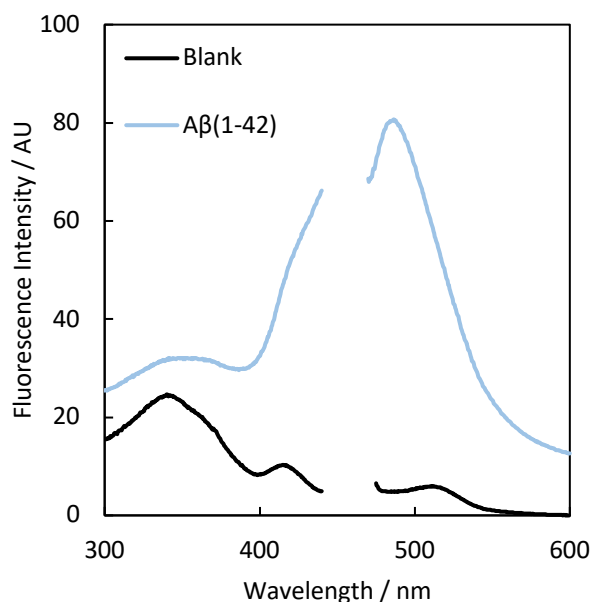

**Figure S14.** Fluorescence spectra ( $\lambda_{\text{ex}} = 440$  nm,  $\lambda_{\text{em}} = 485$  nm) of ThT (1.0  $\mu\text{M}$ ) in the presence and absence of A $\beta$ (1-42) fibrils (500 nM).



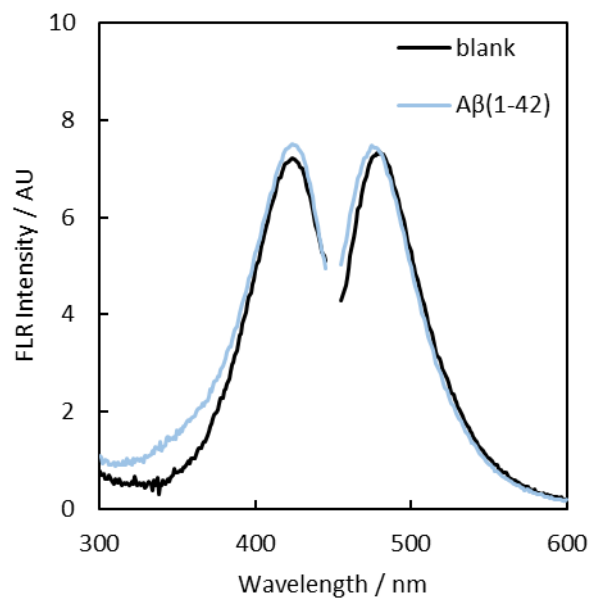

**Figure S15.** Fluorescence spectra ( $\lambda_{\text{ex}} = 425 \text{ nm}$ ,  $\lambda_{\text{em}} = 475 \text{ nm}$ ) of **E265** ( $1.0 \mu\text{M}$ ) in the presence and absence of  $\text{A}\beta(1-42)$  fibrils ( $500 \text{ nM}$ ).

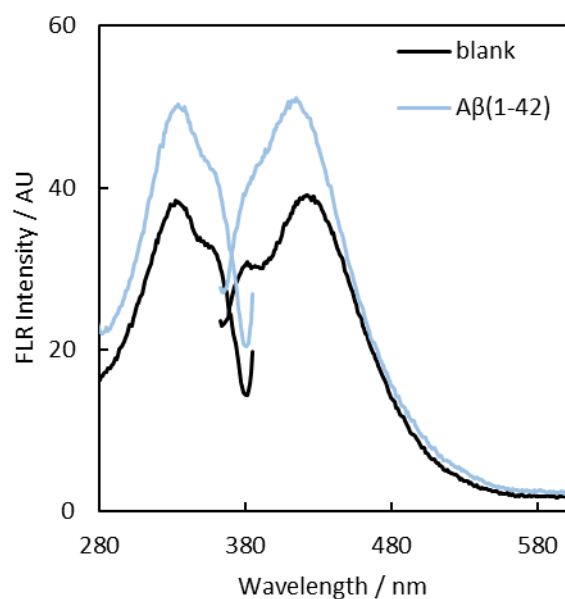

**Figure S16.** Fluorescence spectra ( $\lambda_{\text{ex}} = 333 \text{ nm}$ ,  $\lambda_{\text{em}} = 415 \text{ nm}$ ) of **E736** ( $1.0 \mu\text{M}$ ) in the presence and absence of  $\text{A}\beta(1-42)$  fibrils ( $500 \text{ nM}$ ).

#### *Saturation Binding Assays*

For saturation binding assays, a solution of ThT, **E265**, or **E736** ( $10 \mu\text{M}$ ) and  $\text{A}\beta(1-42)$  fibrils ( $500 \text{ nM}$ ) in  $1\times\text{PBS}$  ( $\text{pH } 7.4$ ) was titrated into a solution of  $\text{A}\beta(1-42)$  fibrils ( $500 \text{ nM}$ ) in  $1\times\text{PBS}$  ( $\text{pH } 7.4$ ) at  $298 \text{ K}$ . Fluorescence emission spectra were taken for ThT at  $\lambda_{\text{ex}} = 440 \text{ nm}$  ( $\lambda_{\text{em}} = 470-600 \text{ nm}$ ), for **E265** at  $\lambda_{\text{ex}} = 425 \text{ nm}$  ( $\lambda_{\text{em}} = 460-600 \text{ nm}$ ), and for **E736** at  $\lambda_{\text{ex}} = 333 \text{ nm}$  ( $\lambda_{\text{em}} = 375-600 \text{ nm}$ ). The presence of fibrils in the ligand solution ensures that there is no dilution of the protein upon titration.

### Competition Binding Assays

For the competition binding assay screening, solutions of competing ligand (82  $\mu\text{M}$ ), ThT (1.0  $\mu\text{M}$ ), and A $\beta$ (1-42) fibrils (250 nM) were titrated into a solution of ThT (1.0  $\mu\text{M}$ ) and A $\beta$ (1-42) fibrils (250 nM) in 1xPBS (pH 7.4) at 298 K. Fluorescence emission spectra were taken for ThT at  $\lambda_{\text{ex}} = 440 \text{ nm}$  ( $\lambda_{\text{em}} = 470\text{-}600 \text{ nm}$ ).

For the higher-resolution competition binding assays of **E163**, **E363**, **E197**, **E363**, and **E704**, solutions of competing ligand (82  $\mu\text{M}$ ), ThT (1.0  $\mu\text{M}$ ), and A $\beta$ (1-42) fibrils (250 nM) were titrated into a solution of ThT (1.0  $\mu\text{M}$ ) and A $\beta$ (1-42) fibrils (250 nM) in 1xPBS (pH 7.4) at 298 K. Fluorescence emission spectra were taken for ThT at  $\lambda_{\text{ex}} = 440 \text{ nm}$  ( $\lambda_{\text{em}} = 470\text{-}600 \text{ nm}$ ).

### Fluorescence Anisotropy Assays

For fluorescence anisotropy blank assays, solutions of ligand (10  $\mu\text{M}$ ) in 1xPBS (pH 7.4) were titrated into a solution of 1xPBS (pH 7.4) at 298 K. Fluorescence emission spectra were taken for **E265** at  $\lambda_{\text{ex}} = 425 \text{ nm}$  ( $\lambda_{\text{em}} = 465\text{-}485 \text{ nm}$ ), and for **E736** at  $\lambda_{\text{ex}} = 333 \text{ nm}$  ( $\lambda_{\text{em}} = 405\text{-}425 \text{ nm}$ ). G-factors were calibrated using solutions of **E265** and **E736** in 1xPBS (20  $\mu\text{M}$ , pH 7.4) for each titration respectively.

### Ligand Dilution Series

Ligand dilution series were performed by repeating the above procedures in the absence of A $\beta$ (1-42) fibrils.

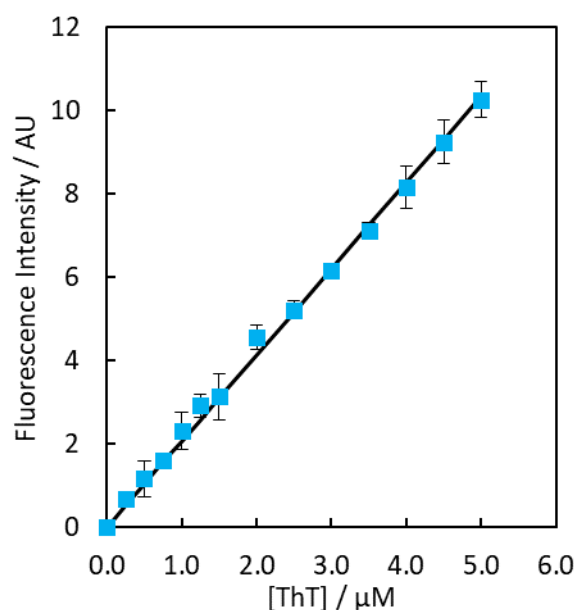

**Figure S17:** Dilution series of ThT into 1xPBS (pH 7.4, 25  $^{\circ}\text{C}$ ). Spectra were recorded using  $\lambda_{\text{ex}} = 440 \text{ nm}$  and monitoring emission at  $\lambda_{\text{em}} = 483 \text{ nm}$ . The experimental measurements are shown as points (error bars represent the 95% confidence interval calculated from at least three independent experiments). The line of best fit has a slope of  $(1.9 \pm 0.2) \times 10^6 \text{ M}^{-1}$  and a y-intercept of 0.

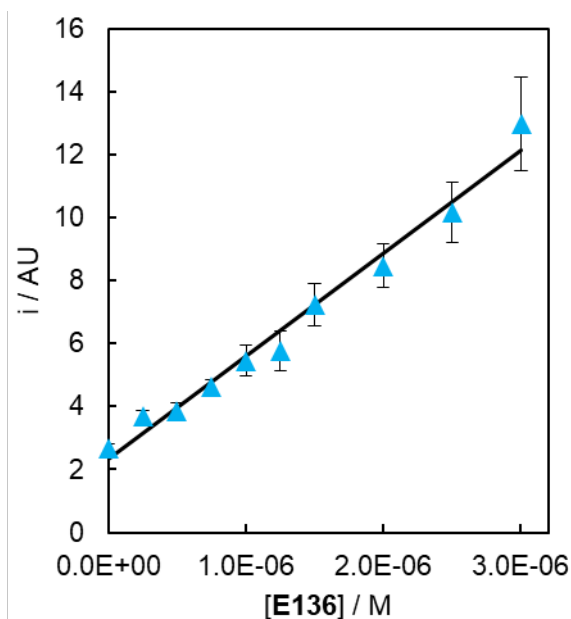

**Figure S18.** Dilution series of **E136** into a solution of ThT (1.0  $\mu\text{M}$ ) in 1xPBS (pH 7.4, 25  $^{\circ}\text{C}$ ). Spectra were recorded using  $\lambda_{\text{ex}} = 440 \text{ nm}$  and monitoring emission at  $\lambda_{\text{em}} = 483 \text{ nm}$ . The experimental measurements are shown as points (error bars represent the 95% confidence interval calculated from at least three independent experiments). The line of best fit has a slope of  $(3.3 \pm 0.4) \times 10^6 \text{ M}^{-1}$  and a y-intercept of  $2.3 \pm 0.1$ .

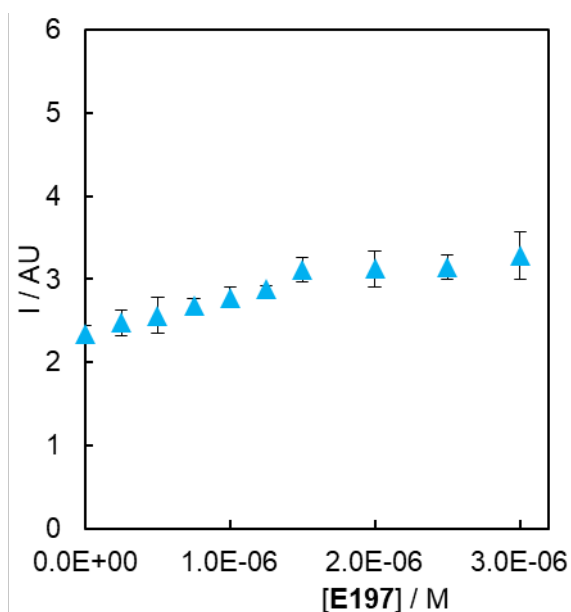

**Figure S19.** Dilution series of **E197** into a solution of ThT (1.0  $\mu\text{M}$ ) in 1xPBS (pH 7.4, 25  $^{\circ}\text{C}$ ). Spectra were recorded using  $\lambda_{\text{ex}} = 440 \text{ nm}$  and monitoring emission at  $\lambda_{\text{em}} = 483 \text{ nm}$ . The experimental measurements are shown as points (error bars represent the 95% confidence interval calculated from at least three independent experiments).

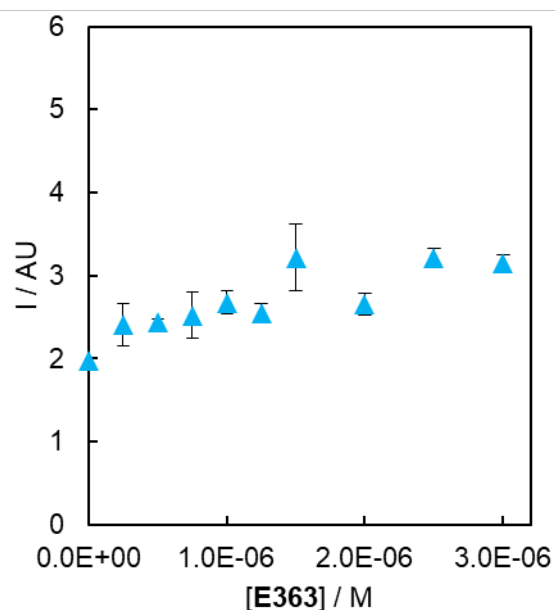

**Figure S20.** Dilution series of **E363** into a solution of ThT (1.0  $\mu$ M) in 1xPBS (pH 7.4, 25  $^{\circ}$ C). Spectra were recorded using  $\lambda_{\text{ex}} = 440$  nm and monitoring emission at  $\lambda_{\text{em}} = 483$  nm. The experimental measurements are shown as points (error bars represent the 95% confidence interval calculated from at least three independent experiments).

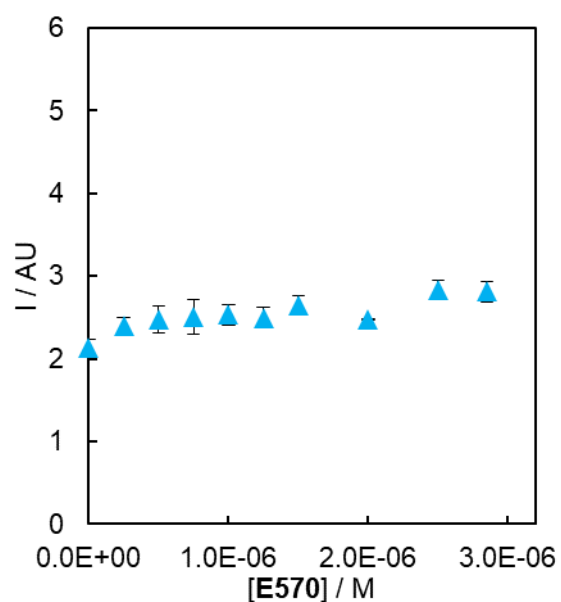

**Figure S21.** Dilution series of **E570** into a solution of ThT (1.0  $\mu$ M) in 1xPBS (pH 7.4, 25  $^{\circ}$ C). Spectra were recorded using  $\lambda_{\text{ex}} = 440$  nm and monitoring emission at  $\lambda_{\text{em}} = 483$  nm. The experimental measurements are shown as points (error bars represent the 95% confidence interval calculated from at least three independent experiments).

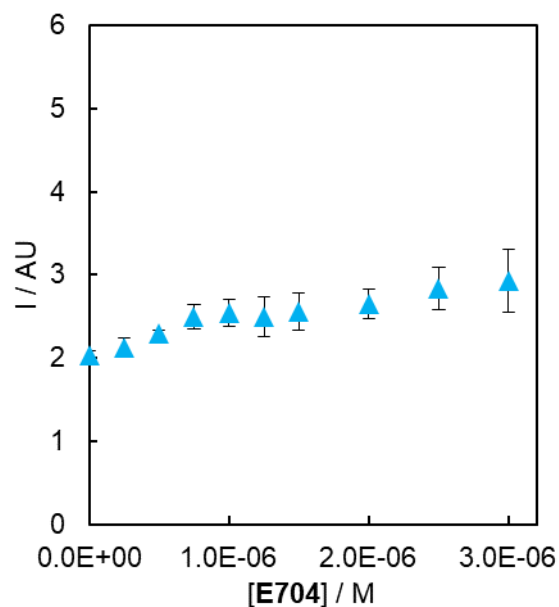

**Figure S22.** Dilution series of **E740** into a solution of ThT (1.0  $\mu\text{M}$ ) in 1xPBS (pH 7.4, 25  $^{\circ}\text{C}$ ). Spectra were recorded using  $\lambda_{\text{ex}} = 440$  nm and monitoring emission at  $\lambda_{\text{em}} = 483$  nm. The experimental measurements are shown as points (error bars represent the 95% confidence interval calculated from at least three independent experiments).

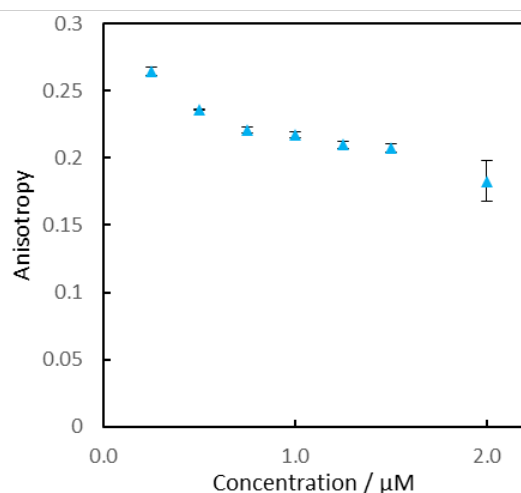

**Figure S23.** The measured fluorescence anisotropy from titrating a solution of E265 (10  $\mu\text{M}$ ) in 1xPBS (pH 7.4) into 1xPBS (pH 7.4, 298K). Spectra were recorded using  $\lambda_{\text{ex}} = 425$  nm and monitoring emission at  $\lambda_{\text{em}} = 475$  nm. Experimental measurements are shown as points (error bars represent the 95% confidence interval calculated from at least three independent experiments).

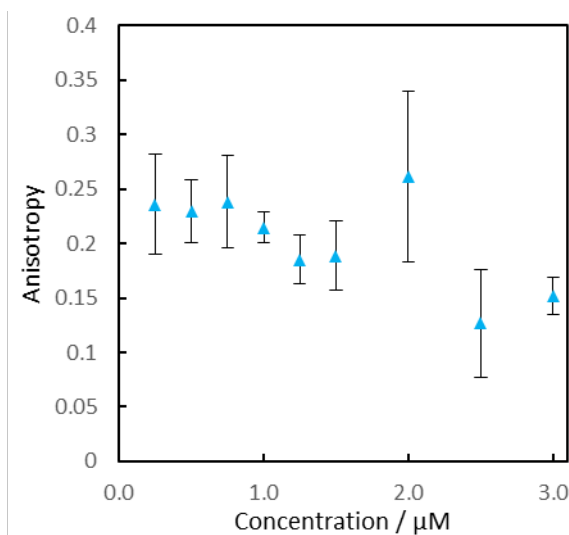

**Figure S24.** The measured fluorescence anisotropy from titrating a solution of E736 (10  $\mu\text{M}$ ) in 1xPBS (pH 7.4) into 1xPBS (pH 7.4, 298K). Spectra were recorded using  $\lambda_{\text{ex}} = 333 \text{ nm}$  and monitoring emission at  $\lambda_{\text{em}} = 415 \text{ nm}$ . Experimental measurements are shown as points (error bars represent the 95% confidence interval calculated from at least three independent experiments).

#### Data Fitting

Fluorescence spectra were analysed using a Microsoft Excel spreadsheet prepared by Professor Christopher Hunter. This spreadsheet fitted the measured fluorescence intensity at a fixed wavelength to a 1:1 binding isotherm using purpose-written VBA macros employing two algorithms, COGS and Simplex.

#### References

- (1) Wang, R.; Fang, X.; Lu, Y.; Wang, S. The PDBbind Database: Collection of Binding Affinities for Protein–Ligand Complexes with Known Three-Dimensional Structures. *J. Med. Chem.* **2004**, *47* (12), 2977–2980.
- (2) Mendez, D.; Gaulton, A.; Bento, A. P.; Chambers, J.; De Veij, M.; Félix, E.; Magariños, M. P.; Mosquera, J. F.; Mutowo, P.; Nowotka, M.; Gordillo-Marañón, M.; Hunter, F.; Junco, L.; Mugumbate, G.; Rodriguez-Lopez, M.; Atkinson, F.; Bosc, N.; Radoux, C. J.; Segura-Cabrera, A.; Hersey, A.; Leach, A. R. ChEMBL: Towards Direct Deposition of Bioassay Data. *Nucleic Acids Res.* **2019**, *47* (D1), D930–D940.
- (3) RDKit: Open-Source Cheminformatics. <http://www.rdkit.org>.
- (4) Chen, T.; Guestrin, C. XGBoost: A Scalable Tree Boosting System. In *Proceedings of the 22nd ACM SIGKDD International Conference on Knowledge Discovery and Data Mining*; KDD '16; Association for Computing Machinery: New York, NY, USA, 2016; pp 785–794. <https://doi.org/10.1145/2939672.2939785>.
- (5) Ke, G.; Meng, Q.; Finley, T.; Wang, T.; Chen, W.; Ma, W.; Ye, Q.; Liu, T.-Y. LightGBM: A Highly Efficient Gradient Boosting Decision Tree. In *Advances in Neural Information Processing Systems*; Curran Associates, Inc., 2017; Vol. 30.
- (6) Freund, Y.; Schapire, R. E. A Decision-Theoretic Generalization of On-Line Learning and an Application to Boosting. *J. Comput. Syst. Sci.* **1997**, *55* (1), 119–139.
- (7) Akiba, T.; Sano, S.; Yanase, T.; Ohta, T.; Koyama, M. Optuna: A Next-Generation Hyperparameter Optimization Framework. arXiv July 25, 2019.
- (8) Sterling, T.; Irwin, J. J. ZINC 15 – Ligand Discovery for Everyone. *J. Chem. Inf. Model.* **2015**, *55* (11), 2324–2337.

- (9) Tanimoto, T. *An Elementary Mathematical Theory of Classification and Prediction.*; Internal IBM Technical Report; 1958.
- (10) Jaccard, P. The Distribution of the Flora in the Alpine Zone.1. *New Phytol.* **1912**, *11* (2), 37–50.
- (11) Sorensen, T. A Method of Establishing Groups of Equal Amplitudes in Plant Sociology Based on Similarity of Species Content and Its Application to Analyses of the Vegetation on Danish Commons. *K. Dan. Vidensk. Selsk. Biol. Skr.* **1948**, *5*, 134.
- (12) Dice, L. R. Measures of the Amount of Ecologic Association Between Species. *Ecology* **1945**, *26* (3), 297–302.
- (13) Teplow, D. B. Preparation of Amyloid  $\beta$ -Protein for Structural and Functional Studies. *Methods Enzymol.* **2006**, *413*, 20–33.
- (14) Zhang, J.; Konsmo, A.; Sandberg, A.; Wu, X.; Nyströ, S.; Obermü, U.; Wegenast-Braun, B. M.; Konradsson, P.; Lindgren, M.; Hammarströ, P. Phenolic Bis-Styrylbenzo[c]-1,2,5-Thiadiazoles as Probes for Fluorescence Microscopy Mapping of A $\beta$  Plaque Heterogeneity. *J. Med. Chem.* **2019**, *62*, 2038–2048.

## FBH Database

**Table S3.** The FBH database collected from the literature and used in model development. The “ $K_i$  / nM” column lists the dissociation constant measured of the compound in a competition assay. The “Error / nM” column gives the error in this measurement reported in the publication. The “ $K_i$  against” column lists the reporting ligand used in the competition assay.

| Compound  | SMILES                                                                                        | DOI                          | $K_i$ / nM | Error / nM | $K_i$ against           |
|-----------|-----------------------------------------------------------------------------------------------|------------------------------|------------|------------|-------------------------|
| CG        | <chem>OC(C=C1)=C(C(O)=O)C=C1/N=N/C2=CC=C(C3=CC=C(/N=N/C4=CC(C(O)=O)=C(O)C=C4)C=C3)C=C2</chem> | 10.1021/jm010045q            | >1000      |            | [ <sup>125</sup> I]TZDM |
| IMSB      | <chem>O=C(O)C1=CC(/C=C/C2=CC=C(/C=C/C3=CC(C(O)=O)=C(OC)C=C3)C(I)=C2)=CC=C1OC</chem>           | 10.1021/jm010045q            | >1000      |            | [ <sup>125</sup> I]TZDM |
| ThT       | <chem>CN(C)C(C=C1)=CC=C1C2=[N+](C)C3=CC=C(O)C=C3S2</chem>                                     | 10.1021/jm010045q            | 294        | 40         | [ <sup>125</sup> I]TZDM |
| Zhuang16a | <chem>BrC1=CC(SC(C2=CC=C(N(C)C)C=C2)=N3)=C3C=C1</chem>                                        | 10.1021/jm010045q            | 0.8        | 0.03       | [ <sup>125</sup> I]TZDM |
| Zhuang16b | <chem>BrC1=CC(SC(C2=CC=C(N3CCN(C)CC3)C=C2)=N4)=C4C=C1</chem>                                  | 10.1021/jm010045q            | 5          | 0.8        | [ <sup>125</sup> I]TZDM |
| TZDM      | <chem>IC1=CC(SC(C2=CC=C(N(C)C)C=C2)=N3)=C3C=C1</chem>                                         | 10.1021/jm010045q            | 2.2        | 0.4        | [ <sup>125</sup> I]TZDM |
| TZPI      | <chem>IC1=CC(SC(C2=CC=C(N3CCN(C)CC3)C=C2)=N4)=C4C=C1</chem>                                   | 10.1021/jm010045q            | 6.4        | 0.7        | [ <sup>125</sup> I]TZDM |
| Cui2a     | <chem>CN(C)C1=CC=C(/C=C(C#N)/C#N)C=C1</chem>                                                  | 10.1021/ja4052922            | >10000     |            | [ <sup>125</sup> I]IMPY |
| Cui2b     | <chem>CN(C)C1=CC=C(/C=C/C=C(C#N)/C#N)C=C1</chem>                                              | 10.1021/ja4052922            | 518.8      | 29.3       | [ <sup>125</sup> I]IMPY |
| Cui2c     | <chem>CN(C)C1=CC=C(/C=C/C=C/C=C(C#N)/C#N)C=C1</chem>                                          | 10.1021/ja4052922            | 36.9       | 6.8        | [ <sup>125</sup> I]IMPY |
| Fu3a      | <chem>CN(C)C1=CC(C=CC(/C=C(C#N)/C#N)=C2)=C2C=C1</chem>                                        | 10.1021/acs.jmedchem.5b00861 | 156.4      | 15.8       | [ <sup>125</sup> I]IMPY |
| Fu3b      | <chem>CN(C)C1=CC(C=CC(/C=C/C=C(C#N)/C#N)=C2)=C2C=C1</chem>                                    | 10.1021/acs.jmedchem.5b00861 | 96.7       | 6.7        | [ <sup>125</sup> I]IMPY |
| Fu3c      | <chem>CN(C)C1=CC(C=CC(/C=C/C=C/C=C(C#N)/C#N)=C2)=C2C=C1</chem>                                | 10.1021/acs.jmedchem.5b00861 | 32.7       | 3.4        | [ <sup>125</sup> I]IMPY |
| Fu3d      | <chem>CN(C)C1=CC(C=CC(/C=C/C=C/C=C/C=C(C#N)/C#N)=C2)=C2C=C1</chem>                            | 10.1021/acs.jmedchem.5b00861 | 197.4      | 43         | [ <sup>125</sup> I]IMPY |
| Fu3e      | <chem>CN(C)C1=CC(C=CC(/C=C/C=C/C=C/C=C/C=C(C#N)/C#N)=C2)=C2C=C1</chem>                        | 10.1021/acs.jmedchem.5b00861 | >1000      |            | [ <sup>125</sup> I]IMPY |
| MAAD-1    | <chem>CN(C)C1=CC=C(/C=C/C=C=C2C(OC(C)(C)OC\2=O)=O)C=C1</chem>                                 | 10.1039/c4cc04907a           | 8007.46    | 462.69     | [ <sup>125</sup> I]IMPY |
| DMDAD-1   | <chem>CN(C)C1=CC=C(/C=C/C=C=C2C(CC(C)(C)CC\2=O)=O)C=C1</chem>                                 | 10.1039/c4cc04907a           | 2775.75    | 1.12       | [ <sup>125</sup> I]IMPY |
| MCAAD-1   | <chem>CN(C)C1=CC=C(/C=C/C=C=C(C(OC)=O)/C#N)C=C1</chem>                                        | 10.1039/c4cc04907a           | 5221.64    | 723.35     | [ <sup>125</sup> I]IMPY |
| DMMAD-1   | <chem>CN(C)C1=CC=C(/C=C/C=C=C(C(OC)=O)/C(OC)=O)C=C1</chem>                                    | 10.1039/c4cc04907a           | 7989.18    | 592.91     | [ <sup>125</sup> I]IMPY |
| MAAD-2    | <chem>CN(C)C1=CC=C(/C=C/C=C/C=C2C(OC(C)(C)OC\2=O)=O)C=C1</chem>                               | 10.1039/c4cc04907a           | 767.16     | 109.98     | [ <sup>125</sup> I]IMPY |
| DMDAD-2   | <chem>CN(C)C1=CC=C(/C=C/C=C/C=C2C(CC(C)(C)CC\2=O)=O)C=C1</chem>                               | 10.1039/c4cc04907a           | 592.09     | 108.97     | [ <sup>125</sup> I]IMPY |
| MCAAD-2   | <chem>CN(C)C1=CC=C(/C=C/C=C/C=C(C(OC)=O)/C#N)C=C1</chem>                                      | 10.1039/c4cc04907a           | 544.37     | 71.6       | [ <sup>125</sup> I]IMPY |
| DMMAD-2   | <chem>CN(C)C1=CC=C(/C=C/C=C/C=C(C(OC)=O)/C(OC)=O)C=C1</chem>                                  | 10.1039/c4cc04907a           | 712.46     | 156.52     | [ <sup>125</sup> I]IMPY |



| Compound | SMILES                                                                             | DOI                          | K <sub>i</sub> / nM | Error / nM | K <sub>i</sub> against  |
|----------|------------------------------------------------------------------------------------|------------------------------|---------------------|------------|-------------------------|
| MAAD-3   | <chem>CN(C)C1=CC=C/C=C/C=C/C=C/C=C2C(OC(C)C)OC\2=O)O)C=C1</chem>                   | 10.1039/c4cc04907a           | 354.3               | 43.5       | [ <sup>125</sup> I]IMPY |
| DMDAD-3  | <chem>CN(C)C1=CC=C/C=C/C=C/C=C/C=C2C(CC(C)C)CC\2=O)O)C=C1</chem>                   | 10.1039/c4cc04907a           | 645.2               | 77.2       | [ <sup>125</sup> I]IMPY |
| MCAAD-3  | <chem>CN(C)C1=CC=C/C=C/C=C/C=C/C=C(C(OC)=O)/C#N)C=C1</chem>                        | 10.1039/c4cc04907a           | 106                 | 29.8       | [ <sup>125</sup> I]IMPY |
| DMMAD-3  | <chem>CN(C)C1=CC=C/C=C/C=C/C=C/C=C(C(OC)=O)/C(OC)=O)C=C1</chem>                    | 10.1039/c4cc04907a           | 652.6               | 143        | [ <sup>125</sup> I]IMPY |
| PHC-1    | <chem>CN(C)C1=CC=C/C=C(C#N)/C#N)C=C1</chem>                                        | 10.1021/acs.analchem.7b02246 | >10000              |            | [ <sup>125</sup> I]IMPY |
| PHC-2    | <chem>CN(C)C1=CC=C/C=C/C=C(C#N)/C#N)C=C1</chem>                                    | 10.1021/acs.analchem.7b02246 | 518.8               | 29.3       | [ <sup>125</sup> I]IMPY |
| PHC-3    | <chem>CN(C)C1=CC=C/C=C/C=C/C=C(C#N)/C#N)C=C1</chem>                                | 10.1021/acs.analchem.7b02246 | 36.9                | 6.8        | [ <sup>125</sup> I]IMPY |
| PHC-4    | <chem>CN(C)C1=CC=C/C=C/C=C/C=C/C=C(C#N)/C#N)C=C1</chem>                            | 10.1021/acs.analchem.7b02246 | 14.1                | 6.4        | [ <sup>125</sup> I]IMPY |
| PHC-5    | <chem>CN(C)C1=CC=C/C=C/C=C/C=C/C=C/C=C(C#N)/C#N)C=C1</chem>                        | 10.1021/acs.analchem.7b02246 | 104.7               | 23.9       | [ <sup>125</sup> I]IMPY |
| PHC-6    | <chem>CN(C)C1=CC=C/C=C/C=C/C=C/C=C/C=C/C=C(C#N)/C#N)C=C1</chem>                    | 10.1021/acs.analchem.7b02246 | 835                 | 175.9      | [ <sup>125</sup> I]IMPY |
| PHC-7    | <chem>CN(C)C1=CC=C/C=C/C=C/C=C/C=C/C=C/C=C/C=C(C#N)/C#N)C=C1</chem>                | 10.1021/acs.analchem.7b02246 | 3061                | 687.7      | [ <sup>125</sup> I]IMPY |
| PYC-1    | <chem>CN(C)C1=CC=C/C=C(C#N)/C#N)C=N1</chem>                                        | 10.1021/acs.analchem.7b02246 | >10000              |            | [ <sup>125</sup> I]IMPY |
| PYC-2    | <chem>CN(C)C1=CC=C/C=C/C=C(C#N)/C#N)C=N1</chem>                                    | 10.1021/acs.analchem.7b02246 | >10000              |            | [ <sup>125</sup> I]IMPY |
| PYC-3    | <chem>CN(C)C1=CC=C/C=C/C=C/C=C(C#N)/C#N)C=N1</chem>                                | 10.1021/acs.analchem.7b02246 | 4984                | 99.7       | [ <sup>125</sup> I]IMPY |
| PYC-4    | <chem>CN(C)C1=CC=C/C=C/C=C/C=C/C=C(C#N)/C#N)C=N1</chem>                            | 10.1021/acs.analchem.7b02246 | 92.6                | 5.8        | [ <sup>125</sup> I]IMPY |
| PYC-5    | <chem>CN(C)C1=CC=C/C=C/C=C/C=C/C=C/C=C(C#N)/C#N)C=N1</chem>                        | 10.1021/acs.analchem.7b02246 | 26.6                | 3.9        | [ <sup>125</sup> I]IMPY |
| PYC-6    | <chem>CN(C)C1=CC=C/C=C/C=C/C=C/C=C/C=C/C=C(C#N)/C#N)C=N1</chem>                    | 10.1021/acs.analchem.7b02246 | 88.2                | 21.7       | [ <sup>125</sup> I]IMPY |
| PYC-7    | <chem>CN(C)C1=CC=C/C=C/C=C/C=C/C=C/C=C/C=C/C=C/C=C(C#N)/C#N)C=N1</chem>            | 10.1021/acs.analchem.7b02246 | 603                 | 138.7      | [ <sup>125</sup> I]IMPY |
| PMC-1    | <chem>CN(C)C1=NC=C/C=C(C#N)/C#N)C=N1</chem>                                        | 10.1021/acs.analchem.7b02246 | >10000              |            | [ <sup>125</sup> I]IMPY |
| PMC-2    | <chem>CN(C)C1=NC=C/C=C/C=C(C#N)/C#N)C=N1</chem>                                    | 10.1021/acs.analchem.7b02246 | >10000              |            | [ <sup>125</sup> I]IMPY |
| PMC-3    | <chem>CN(C)C1=NC=C/C=C/C=C/C=C(C#N)/C#N)C=N1</chem>                                | 10.1021/acs.analchem.7b02246 | 4340                | 1301       | [ <sup>125</sup> I]IMPY |
| PMC-4    | <chem>CN(C)C1=NC=C/C=C/C=C/C=C/C=C(C#N)/C#N)C=N1</chem>                            | 10.1021/acs.analchem.7b02246 | 978.2               | 252        | [ <sup>125</sup> I]IMPY |
| PMC-5    | <chem>CN(C)C1=NC=C/C=C/C=C/C=C/C=C/C=C(C#N)/C#N)C=N1</chem>                        | 10.1021/acs.analchem.7b02246 | 162.1               | 23.6       | [ <sup>125</sup> I]IMPY |
| PMC-6    | <chem>CN(C)C1=NC=C/C=C/C=C/C=C/C=C/C=C(C#N)/C#N)C=N1</chem>                        | 10.1021/acs.analchem.7b02246 | 20.6                | 5.1        | [ <sup>125</sup> I]IMPY |
| PMC-7    | <chem>CN(C)C1=NC=C/C=C/C=C/C=C/C=C/C=C/C=C(C#N)/C#N)C=N1</chem>                    | 10.1021/acs.analchem.7b02246 | 2655                | 425.8      | [ <sup>125</sup> I]IMPY |
| BODIPY7  | <chem>F[B-]1(F)N2C(C=C3[N+]1=C(C)C=C3C)=CC=C2/C=C/C4=CC=C(C5=CC=C(I)C=C5)S4</chem> | 10.1016/j.bmcl.2010.05.027   | 108                 |            | [ <sup>125</sup> I]IMPY |

| Compound    | SMILES                                                                                              | DOI                       | K <sub>i</sub> / nM | Error / nM | K <sub>i</sub> against  |
|-------------|-----------------------------------------------------------------------------------------------------|---------------------------|---------------------|------------|-------------------------|
| Curcumin    | <chem>OC1=C(OC)C=C/C=C/C(C=O)/C=C/C2=CC(OC)=C(O)C=C2=O)C=C1</chem>                                  | 10.1002/cmdc.200700218    | 107                 | 48         | [ <sup>125</sup> I]IMPY |
| Narlawar02  | <chem>OC(C(OC)=C1)=CC=C1/C=C/C2=CC(/C=C/C3=CC(OC)=C(O)C=C3)=NO2</chem>                              | 10.1002/cmdc.200700218    | 138                 | 95         | [ <sup>125</sup> I]IMPY |
| Narlawar03  | <chem>COC1=CC(/C=C/C2=CC(/C=C/C3=CC(OC)=C(O)CC(OC(C)(C)C)=O)C=C3)=NO2)=CC=C1OCC(O)C(C)(C)C=O</chem> | 10.1002/cmdc.200700218    | >1000               |            | [ <sup>125</sup> I]IMPY |
| Narlawar04  | <chem>COC1=CC(/C=C/C2=CC(/C=C/C3=CC(OC)=C(O)CC(O)=O)C=C3)=NO2)=CC=C1OCC(O)=O</chem>                 | 10.1002/cmdc.200700218    | >1000               |            | [ <sup>125</sup> I]IMPY |
| Narlawar05a | <chem>OC(C(OC)=C1)=CC=C1/C=C/C2=CC(/C=C/C3=CC(OC)=C(O)C=C3)=NN2C</chem>                             | 10.1002/cmdc.200700218    | 476                 | 67         | [ <sup>125</sup> I]IMPY |
| Narlawar05b | <chem>OC(C(OC)=C1)=CC=C1/C=C/C2=CC(/C=C/C3=CC(OC)=C(O)C=C3)=NN2CC4=CC=CC=C4</chem>                  | 10.1002/cmdc.200700218    | >1000               |            | [ <sup>125</sup> I]IMPY |
| Narlawar05c | <chem>OC(C(OC)=C1)=CC=C1/C=C/C2=CC(/C=C/C3=CC(OC)=C(O)C=C3)=NN2CC4=CC=CC=C4</chem>                  | 10.1002/cmdc.200700218    | >1000               |            | [ <sup>125</sup> I]IMPY |
| Narlawar05d | <chem>OC(C(OC)=C1)=CC=C1/C=C/C2=CC(/C=C/C3=CC(OC)=C(O)C=C3)=NN2CC4=CC=C([N+])([O-])=O)C=C4</chem>   | 10.1002/cmdc.200700218    | >1000               |            | [ <sup>125</sup> I]IMPY |
| Narlawar05e | <chem>OC(C(OC)=C1)=CC=C1/C=C/C2=CC(/C=C/C3=CC(OC)=C(O)C=C3)=NN2CC4=NN=C(Cl)C=C4</chem>              | 10.1002/cmdc.200700218    | >1000               |            | [ <sup>125</sup> I]IMPY |
| Narlawar05f | <chem>OC(C(OC)=C1)=CC=C1/C=C/C2=CC(/C=C/C3=CC(OC)=C(O)C=C3)=NN2CC4=CC=C(C)C=C4</chem>               | 10.1002/cmdc.200700218    | >1000               |            | [ <sup>125</sup> I]IMPY |
| Narlawar05g | <chem>OC(C(OC)=C1)=CC=C1/C=C/C2=CC(/C=C/C3=CC(OC)=C(O)C=C3)=NN2CC4=CC=C(C(C)C)C=C4</chem>           | 10.1002/cmdc.200700218    | >1000               |            | [ <sup>125</sup> I]IMPY |
| BF-188      | <chem>CNC(C=C1)=CC=C1/C=C/C2=NC3=C(N2)C=CC=C3</chem>                                                | 10.1007/s11307-013-0667-2 | 6.3                 |            | [ <sup>3</sup> H]PiB    |
| PiB         | <chem>CNC(C=C1)=CC=C1C2=NC3=CC=C(O)C=C3S2</chem>                                                    | 10.1007/s11307-013-0667-2 | 5.7                 |            | [ <sup>3</sup> H]PiB    |
| Ono2009-7a  | <chem>O=C(/C=C/C1=CC=C(N(C)C)C=C1)C(C=C2)=CC=C2OCCF</chem>                                          | 10.1021/jm901057p         | 45.7                | 7.1        | [ <sup>125</sup> I]DMIC |
| Ono2009-7b  | <chem>O=C(/C=C/C1=CC=C(N(C)C)C=C1)C(C=C2)=CC=C2OCCOCCF</chem>                                       | 10.1021/jm901057p         | 20                  | 2.5        | [ <sup>125</sup> I]DMIC |
| Ono2009-7c  | <chem>O=C(/C=C/C1=CC=C(N(C)C)C=C1)C(C=C2)=CC=C2OCCOCCOCCF</chem>                                    | 10.1021/jm901057p         | 38.9                | 4.2        | [ <sup>125</sup> I]DMIC |
| Ono2009-11a | <chem>O=C(/C=C/C1=CC=C(N)C=C1)C(C=C2)=CC=C2OCCF</chem>                                              | 10.1021/jm901057p         | 678.9               | 21.7       | [ <sup>125</sup> I]DMIC |
| Ono2009-11b | <chem>O=C(/C=C/C1=CC=C(N)C=C1)C(C=C2)=CC=C2OCCOCCF</chem>                                           | 10.1021/jm901057p         | 1048                | 114.3      | [ <sup>125</sup> I]DMIC |
| Ono2009-11c | <chem>O=C(/C=C/C1=CC=C(N)C=C1)C(C=C2)=CC=C2OCCOCCOCCF</chem>                                        | 10.1021/jm901057p         | 790                 | 132.1      | [ <sup>125</sup> I]DMIC |
| Ono2009-12a | <chem>O=C(/C=C/C1=CC=C(NC)C=C1)C(C=C2)=CC=C2OCCF</chem>                                             | 10.1021/jm901057p         | 197.1               | 58.8       | [ <sup>125</sup> I]DMIC |
| Ono2009-12b | <chem>O=C(/C=C/C1=CC=C(NC)C=C1)C(C=C2)=CC=C2OCCOCCF</chem>                                          | 10.1021/jm901057p         | 216.4               | 13.8       | [ <sup>125</sup> I]DMIC |
| Ono2009-12c | <chem>O=C(/C=C/C1=CC=C(NC)C=C1)C(C=C2)=CC=C2OCCOCCOCCF</chem>                                       | 10.1021/jm901057p         | 470.9               | 100.4      | [ <sup>125</sup> I]DMIC |
| Ono2009-13  | <chem>FC1=CC=C(C(/C=C/C2=CC=C(N(C)C)C=C2)=O)C=C1</chem>                                             | 10.1021/jm901057p         | 49.8                | 6.2        | [ <sup>125</sup> I]DMIC |
| Ono2009-15  | <chem>FC1=CC=C(C(/C=C/C2=CC=C(N)C=C2)=O)C=C1</chem>                                                 | 10.1021/jm901057p         | 663                 | 88.3       | [ <sup>125</sup> I]DMIC |
| Ono2009-16  | <chem>FC1=CC=C(C(/C=C/C2=CC=C(NC)C=C2)=O)C=C1</chem>                                                | 10.1021/jm901057p         | 234.2               | 44         | [ <sup>125</sup> I]DMIC |

| Compound   | SMILES                                                                                                                          | DOI                         | K <sub>i</sub> / nM | Error / nM | K <sub>i</sub> against        |
|------------|---------------------------------------------------------------------------------------------------------------------------------|-----------------------------|---------------------|------------|-------------------------------|
| DMIC       | <chem>IC1=CC=C(C/C=C/C2=CC=C(N(C)C)C=C2)=O)C=C1</chem>                                                                          | 10.1021/jm901057p           | 13.1                | 3          | [ <sup>125</sup> I]DMIC       |
| IMPY       | <chem>IC1=CN2C(C=C1)=NC(C3=CC=C(N(C)C)C=C3)=C2</chem>                                                                           | 10.1021/jm901057p           | 28                  | 4.1        | [ <sup>125</sup> I]DMIC       |
| Cui2011-01 | <chem>FC1=CC=C(C/C=C/C2=CC=C(NC=C3)C3=C2)=O)C=C1</chem>                                                                         | 10.1016/j.bmcl.2010.12.045  | 35.06               | 6.21       | [ <sup>125</sup> I]IMPY       |
| Cui2011-02 | <chem>ClC1=CC=C(C/C=C/C2=CC=C(NC=C3)C3=C2)=O)C=C1</chem>                                                                        | 10.1016/j.bmcl.2010.12.045  | 8.43                | 2.13       | [ <sup>125</sup> I]IMPY       |
| Cui2011-03 | <chem>BrC1=CC=C(C/C=C/C2=CC=C(NC=C3)C3=C2)=O)C=C1</chem>                                                                        | 10.1016/j.bmcl.2010.12.045  | 8.96                | 0.92       | [ <sup>125</sup> I]IMPY       |
| Cui2011-04 | <chem>IC1=CC=C(C/C=C/C2=CC=C(NC=C3)C3=C2)=O)C=C1</chem>                                                                         | 10.1016/j.bmcl.2010.12.045  | 8.22                | 1.46       | [ <sup>125</sup> I]IMPY       |
| Cui2011-05 | <chem>OC1=CC=C(C/C=C/C2=CC=C(NC=C3)C3=C2)=O)C=C1</chem>                                                                         | 10.1016/j.bmcl.2010.12.045  | >360                |            | [ <sup>125</sup> I]IMPY       |
| Cui2011-06 | <chem>COc1=CC=C(C/C=C/C2=CC=C(NC=C3)C3=C2)=O)C=C1</chem>                                                                        | 10.1016/j.bmcl.2010.12.045  | 8.52                | 2.15       | [ <sup>125</sup> I]IMPY       |
| Cui2011-07 | <chem>NC1=CC=C(C/C=C/C2=CC=C(NC=C3)C3=C2)=O)C=C1</chem>                                                                         | 10.1016/j.bmcl.2010.12.045  | >1008               |            | [ <sup>125</sup> I]IMPY       |
| Cui2011-08 | <chem>CNC1=CC=C(C/C=C/C2=CC=C(NC=C3)C3=C2)=O)C=C1</chem>                                                                        | 10.1016/j.bmcl.2010.12.045  | 51.09               | 7.71       | [ <sup>125</sup> I]IMPY       |
| Cui2011-09 | <chem>CN(C)C1=CC=C(C/C=C/C2=CC=C(NC=C3)C3=C2)=O)C=C1</chem>                                                                     | 10.1016/j.bmcl.2010.12.045  | 5.17                | 0.32       | [ <sup>125</sup> I]IMPY       |
| Cui2011-10 | <chem>O=C(/C=C/C1=CC=C(NC=C2)C2=C1)C(C=C3)=CC4=C3C=C(OC)C=C4</chem>                                                             | 10.1016/j.bmcl.2010.12.045  | 4.46                | 0.87       | [ <sup>125</sup> I]IMPY       |
| DMIC       | <chem>IC1=CC=C(C/C=C/C2=CC=C(N(C)C)C=C2)=O)C=C1</chem>                                                                          | 10.1016/j.bmcl.2010.12.045  | 1.97                | 0.26       | [ <sup>125</sup> I]IMPY       |
| FIAR       | <chem>IC1=CC(C/C(O2)=C/C3=CC=C(OCCF)C=C3)=O)C2C=C1</chem>                                                                       | 10.1016/j.bmcl.2010.108.063 | 6.81                |            | [ <sup>125</sup> I]IMPY       |
| Ono2005-10 | <chem>IC1=CC(C(C=C(C2=CC=C(NC)C=C2)O3)=O)=C3C=C1</chem>                                                                         | 10.1021/jm050635e           | 30                  | 3.4        | [ <sup>125</sup> I]Ono2005-11 |
| Ono2005-11 | <chem>IC1=CC(C(C=C(C2=CC=C(N(C)C)C=C2)O3)=O)=C3C=C1</chem>                                                                      | 10.1021/jm050635e           | 15.6                | 2.4        | [ <sup>125</sup> I]Ono2005-11 |
| Ono2005-19 | <chem>IC1=CC(C(C=C(C2=CC=C(OC)C=C2)O3)=O)=C3C=C1</chem>                                                                         | 10.1021/jm050635e           | 38.3                | 8.1        | [ <sup>125</sup> I]Ono2005-11 |
| Ono2005-20 | <chem>IC1=CC(C(C=C(C2=CC=C(O)C=C2)O3)=O)=C3C=C1</chem>                                                                          | 10.1021/jm050635e           | 77.2                | 9.2        | [ <sup>125</sup> I]Ono2005-11 |
| ThT        | <chem>OC1=CC=C([N+](C)=C(C2=CC=C(N(C)C)C=C2)S3)C3=C1</chem>                                                                     | 10.1021/jm050635e           | >1000               |            | [ <sup>125</sup> I]Ono2005-11 |
| CR         | <chem>CC1=CC(C2=CC=C(/N=N/C3=CC(S(=O)([O-])=O)=C(C=CC=C4)C4=C3N)C(C)=C2)=CC=C1/N=N/C5=CC(S(=O)([O-])=O)=C(C=CC=C6)C6=C5N</chem> | 10.1021/jm050635e           | >1000               |            | [ <sup>125</sup> I]Ono2005-11 |
| Ono2008-12 | <chem>IC(C=C1)=CC=C1C2=NOC(C3=CC=C(N)C=C3)=N2</chem>                                                                            | 10.1016/j.bmc.2008.05.054   | 14.2                | 1.4        | [ <sup>125</sup> I]IMPY       |
| Ono2008-13 | <chem>IC(C=C1)=CC=C1C2=NOC(C3=CC=C(NC)C=C3)=N2</chem>                                                                           | 10.1016/j.bmc.2008.05.054   | 14.3                | 3.6        | [ <sup>125</sup> I]IMPY       |
| Ono2008-14 | <chem>IC(C=C1)=CC=C1C2=NOC(C3=CC=C(N(C)C)C=C3)=N2</chem>                                                                        | 10.1016/j.bmc.2008.05.054   | 15.4                | 1.4        | [ <sup>125</sup> I]IMPY       |
| Ono2008-15 | <chem>IC(C=C1)=CC=C1C2=NOC(C3=CC=C(OC)C=C3)=N2</chem>                                                                           | 10.1016/j.bmc.2008.05.054   | 4.3                 | 2.1        | [ <sup>125</sup> I]IMPY       |
| Ono2008-16 | <chem>IC(C=C1)=CC=C1C2=NOC(C3=CC=C(O)C=C3)=N2</chem>                                                                            | 10.1016/j.bmc.2008.05.054   | 47.1                | 4.1        | [ <sup>125</sup> I]IMPY       |

| Compound                                   | SMILES                                                            | DOI                       | K <sub>i</sub> / nM | Error / nM | K <sub>i</sub> against  |
|--------------------------------------------|-------------------------------------------------------------------|---------------------------|---------------------|------------|-------------------------|
| Watanabe2<br>009-03<br>(1,3,4-<br>DPOD-DM) | <chem>IC(C=C1)=CC=C1C2=NN=C(C3=CC=C(N(C)C)C=C3)O2</chem>          | 10.1016/j.bmc.2009.07.020 | 20.1                | 2.5        | [ <sup>125</sup> I]IMPY |
| Watanabe2<br>009-04                        | <chem>IC(C=C1)=CC=C1C2=NN=C(C3=CC=C(OC)C=C3)O2</chem>             | 10.1016/j.bmc.2009.07.020 | 46.1                | 12.6       | [ <sup>125</sup> I]IMPY |
| Watanabe2<br>009-06                        | <chem>IC(C=C1)=CC=C1C2=NN=C(C3=CC=C(O)C=C3)O2</chem>              | 10.1016/j.bmc.2009.07.020 | 229.6               | 47.3       | [ <sup>125</sup> I]IMPY |
| Watanabe2<br>009-07                        | <chem>IC(C=C1)=CC=C1C2=NN=C(C3=CC=C(OCCO)C=C3)O2</chem>           | 10.1016/j.bmc.2009.07.020 | 282.2               | 61.4       | [ <sup>125</sup> I]IMPY |
| Watanabe2<br>009-08                        | <chem>IC(C=C1)=CC=C1C2=NN=C(C3=CC=C(OCCOCCO)C=C3)O2</chem>        | 10.1016/j.bmc.2009.07.020 | 348.6               | 51.7       | [ <sup>125</sup> I]IMPY |
| Watanabe2<br>009-09                        | <chem>IC(C=C1)=CC=C1C2=NN=C(C3=CC=C(OCCOCCOCCO)C=C3)O2</chem>     | 10.1016/j.bmc.2009.07.020 | 257.7               | 34.8       | [ <sup>125</sup> I]IMPY |
| Cui2012-24                                 | <chem>CNC(C=C1)=CC=C1C2=NC3=CC(OCCOCCOCCF)=CC=C3O2</chem>         | 10.1021/jm300251n         | 9.3                 | 2.2        | [ <sup>125</sup> I]IMPY |
| Cui2012-32                                 | <chem>CN(C)C(C=C1)=CC=C1C2=NC3=CC(OCCOCCOCCF)=CC=C3O2</chem>      | 10.1021/jm300251n         | 3.9                 | 0.7        | [ <sup>125</sup> I]IMPY |
| Cui2011-03                                 | <chem>BrC1=CC=C(OC(C2=CC=C([N+])([O-])=O)C=C2)=O)=C3)C3=C1</chem> | 10.1016/j.bmc.2011.04.049 | >1000               |            | [ <sup>125</sup> I]IMPY |
| Cui2011-04                                 | <chem>IC1=CC=C(OC(C2=CC=C([N+])([O-])=O)C=C2)=O)=C3)C3=C1</chem>  | 10.1016/j.bmc.2011.04.049 | >1000               |            | [ <sup>125</sup> I]IMPY |
| Cui2011-05                                 | <chem>BrC1=CC=C(OC(C2=CC=C(N)C=C2)=O)=C3)C3=C1</chem>             | 10.1016/j.bmc.2011.04.049 | 156.6               | 23.3       | [ <sup>125</sup> I]IMPY |
| Cui2011-06                                 | <chem>IC1=CC=C(OC(C2=CC=C(N)C=C2)=O)=C3)C3=C1</chem>              | 10.1016/j.bmc.2011.04.049 | 133.2               | 10.4       | [ <sup>125</sup> I]IMPY |
| Cui2011-07                                 | <chem>BrC1=CC=C(OC(C2=CC=C(NC)C=C2)=O)=C3)C3=C1</chem>            | 10.1016/j.bmc.2011.04.049 | 44.9                | 9.7        | [ <sup>125</sup> I]IMPY |
| Cui2011-08                                 | <chem>IC1=CC=C(OC(C2=CC=C(NC)C=C2)=O)=C3)C3=C1</chem>             | 10.1016/j.bmc.2011.04.049 | 34.5                | 7.3        | [ <sup>125</sup> I]IMPY |
| Cui2011-09                                 | <chem>BrC1=CC=C(OC(C2=CC=C(N(C)C)C=C2)=O)=C3)C3=C1</chem>         | 10.1016/j.bmc.2011.04.049 | 8.8                 | 3.9        | [ <sup>125</sup> I]IMPY |
| Cui2011-10                                 | <chem>IC1=CC=C(OC(C2=CC=C(N(C)C)C=C2)=O)=C3)C3=C1</chem>          | 10.1016/j.bmc.2011.04.049 | 6.6                 | 1          | [ <sup>125</sup> I]IMPY |
| Re-BAT-Bp-1                                |                                                                   | 10.1021/jm201513c         | 149.6               | 34.4       | [ <sup>125</sup> I]IMPY |
| Re-BAT-Bp-2                                |                                                                   | 10.1021/jm201513c         | 32.8                | 5.8        | [ <sup>125</sup> I]IMPY |
| Re-BAT-Bp-3                                |                                                                   | 10.1021/jm201513c         | 13.6                | 1.6        | [ <sup>125</sup> I]IMPY |
| Ono2011b-10                                | <chem>FCCOCCOCCOC1=CC=C(OC(C2=CN=C(NC)C=C2)=C3)C3=C1</chem>       | 10.1021/jm200057u         | 2.41                | 0.11       | [ <sup>125</sup> I]IMPY |
| Ono2011b-21                                | <chem>FCCOCCOCCOC1=CC=C(OC(C2=CC=C(NC)C=C2)=C3)C3=C1</chem>       | 10.1021/jm200057u         | 3.85                | 0.22       | [ <sup>125</sup> I]IMPY |
| FPYBF-1                                    | <chem>FCCOCCOCCOC1=CC=C(OC(C2=CN=C(N(C)C)C=C2)=C3)C3=C1</chem>    | 10.1021/jm200057u         | 0.95                | 0.21       | [ <sup>125</sup> I]IMPY |
| FPHBF-1                                    | <chem>FCCOCCOCCOC1=CC=C(OC(C2=CC=C(N(C)C)C=C2)=C3)C3=C1</chem>    | 10.1021/jm200057u         | 2                   | 0.5        | [ <sup>125</sup> I]IMPY |
| PiB                                        | <chem>OC1=CC=C(N=C(C2=CC=C(NC)C=C2)S3)C3=C1</chem>                | 10.1021/jm200057u         | 9                   | 1.31       | [ <sup>125</sup> I]IMPY |
| Cheng2010-05                               | <chem>FC1=CC=C(OC(C2=CC=C(N)C=C2)=C3)C3=C1</chem>                 | 10.1021/ml100082x         | 0.9                 | 0.2        | [ <sup>125</sup> I]IMPY |

| Compound       | SMILES                                                                | DOI                             | K <sub>i</sub> / nM | Error / nM | K <sub>i</sub> against  |
|----------------|-----------------------------------------------------------------------|---------------------------------|---------------------|------------|-------------------------|
| Cheng2010-06   | <chem>FC1=CC=C(OC(C2=CC=C(NC)C=C2)=C3)C3=C1</chem>                    | 10.1021/ml100082x               | 0.53                | 0.05       | [ <sup>125</sup> I]IMPY |
| Cheng2010-07   | <chem>FC1=CC=C(OC(C2=CC=C(N(C)C)C=C2)=C3)C3=C1</chem>                 | 10.1021/ml100082x               | 0.26                | 0.01       | [ <sup>125</sup> I]IMPY |
| Cheng2010-17   | <chem>CN(C)C(C=C1)=CC=C1C2=CC3=CC(OCCOCCOCF)=CC=C3O2</chem>           | 10.1021/ml100082x               | 2                   | 0.5        | [ <sup>125</sup> I]IMPY |
| Cheng2010-21   | <chem>CN(C)C(C=C1)=CC=C1C2=CC3=CC(OCC(CO)CF)=CC=C3O2</chem>           | 10.1021/ml100082x               | 1                   | 0.3        | [ <sup>125</sup> I]IMPY |
| FPYBF-1        | <chem>FCCOCCOCCOC1=CC=C(OC(C2=CN=C(N(C)C)C=C2)=C3)C3=C1</chem>        | 10.1016/j.bmcl.2010.08.016      | 0.9                 |            | [ <sup>125</sup> I]IMPY |
| Cui2011c-12    | <chem>IC1=CC(NC(C2=CC=C(N(C)C)C=C2)=N3)=C3C=C1</chem>                 | 10.1016/j.nucmedbio.2010.09.012 | 9.8                 | 1.2        | [ <sup>125</sup> I]IMPY |
| Cui2011c-13    | <chem>IC1=CC(NC(C2=CC=C(NC)C=C2)=N3)=C3C=C1</chem>                    | 10.1016/j.nucmedbio.2010.09.012 | 40.3                | 4.5        | [ <sup>125</sup> I]IMPY |
| Cui2011c-14    | <chem>IC1=CC(NC(C2=CC=C(N)C=C2)=N3)=C3C=C1</chem>                     | 10.1016/j.nucmedbio.2010.09.012 | 315.1               | 11.2       | [ <sup>125</sup> I]IMPY |
| Cui2011c-15    | <chem>IC1=CC(NC(C2=CC=C(OC)C=C2)=N3)=C3C=C1</chem>                    | 10.1016/j.nucmedbio.2010.09.012 | 190.1               | 6.4        | [ <sup>125</sup> I]IMPY |
| Cui2011c-16    | <chem>IC1=CC(NC(C2=CC=C(O)C=C2)=N3)=C3C=C1</chem>                     | 10.1016/j.nucmedbio.2010.09.012 | 901.5               | 22.1       | [ <sup>125</sup> I]IMPY |
| IMPY           | <chem>IC1=CN2C(C=C1)=NC(C3=CC=C(N(C)C)C=C3)=C2</chem>                 | 10.1016/j.nucmedbio.2010.09.012 | 10.5                | 1          | [ <sup>125</sup> I]IMPY |
| PIB            | <chem>OC1=CC=C(N=C(C2=CC=C(NC[3H])C=C2)S3)C3=C1</chem>                | 10.1021/jm101129a               | 13                  |            | [ <sup>3</sup> H]PIB    |
| Yousefi2011-05 | <chem>CNC(C=C1)=CC=C1C2=CN(C3=CC=C(OC)C=C3S4)C4=N2</chem>             | 10.1021/jm101129a               | 5.8                 |            | [ <sup>3</sup> H]PIB    |
| Cui2011d-03    | <chem>BrC1=CC(N=CC(C2=CC=C(N(C)C)C=C2)=N3)=C3C=C1</chem>              | 10.1016/j.bmcl.2011.05.079      | 2.6                 | 0.2        | [ <sup>125</sup> I]IMPY |
| Cui2011d-05    | <chem>IC1=CC(N=CC(C2=CC=C(N(C)C)C=C2)=N3)=C3C=C1</chem>               | 10.1016/j.bmcl.2011.05.079      | 4.1                 | 0.7        | [ <sup>125</sup> I]IMPY |
| Cui2011d-11    | <chem>IC1=CC(N=CC(C2=CC=C(N)C=C2)=N3)=C3C=C1</chem>                   | 10.1016/j.bmcl.2011.05.079      | 10.7                | 1.1        | [ <sup>125</sup> I]IMPY |
| Cui2011d-12    | <chem>IC1=CC(N=CC(C2=CC=C(NC)C=C2)=N3)=C3C=C1</chem>                  | 10.1016/j.bmcl.2011.05.079      | 7.7                 | 1.4        | [ <sup>125</sup> I]IMPY |
| Cui2011-02     | <chem>O=C(/C=C/C1=CC=CC=C1)/C=C/C2=CC=C(N(C)C)C=C2</chem>             | 10.1021/jm101404k               | 1.2                 | 0.2        | [ <sup>125</sup> I]IMPY |
| Cui2011-03     | <chem>O=C(/C=C/C1=CC=C(F)C=C1)/C=C/C2=CC=C(N(C)C)C=C2</chem>          | 10.1021/jm101404k               | 3.7                 | 0.9        | [ <sup>125</sup> I]IMPY |
| Cui2011-04     | <chem>O=C(/C=C/C1=CC=C(Cl)C=C1)/C=C/C2=CC=C(N(C)C)C=C2</chem>         | 10.1021/jm101404k               | 1.1                 | 0.2        | [ <sup>125</sup> I]IMPY |
| Cui2011-05     | <chem>O=C(/C=C/C1=CC=C(Br)C=C1)/C=C/C2=CC=C(N(C)C)C=C2</chem>         | 10.1021/jm101404k               | 2.8                 | 0.5        | [ <sup>125</sup> I]IMPY |
| Cui2011-06     | <chem>O=C(/C=C/C1=CC=C(I)C=C1)/C=C/C2=CC=C(N(C)C)C=C2</chem>          | 10.1021/jm101404k               | 0.9                 | 0.2        | [ <sup>125</sup> I]IMPY |
| Cui2011-07     | <chem>O=C(/C=C/C1=CC=C(O)C=C1)/C=C/C2=CC=C(N(C)C)C=C2</chem>          | 10.1021/jm101404k               | 6.8                 | 1.6        | [ <sup>125</sup> I]IMPY |
| Cui2011-08     | <chem>O=C(/C=C/C1=CC=C(OC)C=C1)/C=C/C2=CC=C(N(C)C)C=C2</chem>         | 10.1021/jm101404k               | 0.7                 | 0.1        | [ <sup>125</sup> I]IMPY |
| Cui2011-09     | <chem>O=C(/C=C/C1=CC=C([N+])([O-])C=C1)/C=C/C2=CC=C(N(C)C)C=C2</chem> | 10.1021/jm101404k               | 5.2                 | 1.1        | [ <sup>125</sup> I]IMPY |
| Cui2011-10     | <chem>O=C(/C=C/C1=CC=C(N)C=C1)/C=C/C2=CC=C(N(C)C)C=C2</chem>          | 10.1021/jm101404k               | 3.7                 | 0.4        | [ <sup>125</sup> I]IMPY |

| Compound   | SMILES                                                                           | DOI               | K <sub>i</sub> / nM | Error / nM | K <sub>i</sub> against  |
|------------|----------------------------------------------------------------------------------|-------------------|---------------------|------------|-------------------------|
| Cui2011-11 | <chem>O=C(/C=C/C1=CC=C(NC)C=C1)/C=C/C2=CC=C(N(C)C)C=C2</chem>                    | 10.1021/jm101404k | 2.9                 | 0.5        | [ <sup>125</sup> I]IMPY |
| Cui2011-12 | <chem>O=C(/C=C/C1=CC=C(N(C)C)C=C1)/C=C/C2=CC=C(N(C)C)C=C2</chem>                 | 10.1021/jm101404k | 2.7                 | 0.6        | [ <sup>125</sup> I]IMPY |
| Cui2011-13 | <chem>O=C(/C=C/C1=CC=C(C(O)=O)C=C1)/C=C/C2=C=C(N(C)C)C=C2</chem>                 | 10.1021/jm101404k | 78.1                | 8.5        | [ <sup>125</sup> I]IMPY |
| Cui2011-14 | <chem>O=C(/C=C/C1=CC=C(C(F)(F)F)C=C1)/C=C/C2=CC=C(N(C)C)C=C2</chem>              | 10.1021/jm101404k | 0.8                 | 0.2        | [ <sup>125</sup> I]IMPY |
| Cui2011-15 | <chem>O=C(/C=C/C1=CC=C(C)C=C1)/C=C/C2=CC=C(N(C)C)C=C2</chem>                     | 10.1021/jm101404k | 1.3                 | 0.2        | [ <sup>125</sup> I]IMPY |
| Cui2011-16 | <chem>O=C(/C=C/C1=CC=C(N(CC)(CC))C=C1)/C=C/C2=CC=C(N(C)C)C=C2</chem>             | 10.1021/jm101404k | 15.7                | 3.9        | [ <sup>125</sup> I]IMPY |
| Cui2011-17 | <chem>O=C(/C=C/C1=CC=C(N(C2=CC=CC2)C3=CC=CC3)C=C1)/C=C/C4=CC=C(N(C)C)C=C4</chem> | 10.1021/jm101404k | 131.2               | 20.3       | [ <sup>125</sup> I]IMPY |
| Cui2011-18 | <chem>O=C(/C=C/C1=CC=C(OCC2=CC=CC2)C=C1)/C=C/C3=CC=C(N(C)C)C=C3</chem>           | 10.1021/jm101404k | 2                   | 0.2        | [ <sup>125</sup> I]IMPY |
| Cui2011-19 | <chem>O=C(/C=C/C1=CC=CC(F)=C1)/C=C/C2=CC=C(N(C)C)C=C2</chem>                     | 10.1021/jm101404k | 1.2                 | 0.1        | [ <sup>125</sup> I]IMPY |
| Cui2011-20 | <chem>O=C(/C=C/C1=CC=CC(Br)=C1)/C=C/C2=CC=C(N(C)C)C=C2</chem>                    | 10.1021/jm101404k | 1.9                 | 0.3        | [ <sup>125</sup> I]IMPY |
| Cui2011-21 | <chem>O=C(/C=C/C1=CC=CC(I)=C1)/C=C/C2=CC=C(N(C)C)C=C2</chem>                     | 10.1021/jm101404k | 5.5                 | 1.7        | [ <sup>125</sup> I]IMPY |
| Cui2011-22 | <chem>O=C(/C=C/C1=CC=CC([N+])([O-])=O)C=C1)/C=C/C2=CC=C(N(C)C)C=C2</chem>        | 10.1021/jm101404k | 4                   | 1.4        | [ <sup>125</sup> I]IMPY |
| Cui2011-23 | <chem>O=C(/C=C/C1=CC=CC(N)=C1)/C=C/C2=CC=C(N(C)C)C=C2</chem>                     | 10.1021/jm101404k | 13.7                | 3.4        | [ <sup>125</sup> I]IMPY |
| Cui2011-24 | <chem>O=C(/C=C/C1=CC=CC(NC)=C1)/C=C/C2=CC=C(N(C)C)C=C2</chem>                    | 10.1021/jm101404k | 8.1                 | 1.4        | [ <sup>125</sup> I]IMPY |
| Cui2011-25 | <chem>O=C(/C=C/C1=CC=CC(N(C)C)=C1)/C=C/C2=CC=C(N(C)C)C=C2</chem>                 | 10.1021/jm101404k | 8                   | 0.6        | [ <sup>125</sup> I]IMPY |
| Cui2011-26 | <chem>O=C(/C=C/C1=CC=CC=C1OCC2=CC=CC2)/C=C/C3=CC=C(N(C)C)C=C3</chem>             | 10.1021/jm101404k | 18.6                | 8.1        | [ <sup>125</sup> I]IMPY |
| Cui2011-27 | <chem>O=C(/C=C/C1=CC=CC=C1Cl)/C=C/C2=CC=C(N(C)C)C=C2</chem>                      | 10.1021/jm101404k | 0.9                 | 0.1        | [ <sup>125</sup> I]IMPY |
| Cui2011-28 | <chem>O=C(/C=C/C1=CC=CC=C1O)/C=C/C2=CC=C(N(C)C)C=C2</chem>                       | 10.1021/jm101404k | 28.2                | 5.1        | [ <sup>125</sup> I]IMPY |
| Cui2011-29 | <chem>O=C(/C=C/C1=CC=CC=C1[N+])([O-])=O)/C=C/C2=CC=C(N(C)C)C=C2</chem>           | 10.1021/jm101404k | 18.8                | 3          | [ <sup>125</sup> I]IMPY |
| Cui2011-30 | <chem>O=C(/C=C/C1=CC=CC=C1N)/C=C/C2=CC=C(N(C)C)C=C2</chem>                       | 10.1021/jm101404k | 8.4                 | 3          | [ <sup>125</sup> I]IMPY |
| Cui2011-31 | <chem>O=C(/C=C/C1=CC=CC=C1NC)/C=C/C2=CC=C(N(C)C)C=C2</chem>                      | 10.1021/jm101404k | 2636.5              | 140.8      | [ <sup>125</sup> I]IMPY |
| Cui2011-32 | <chem>O=C(/C=C/C1=C(Cl)C=CC=C1Cl)/C=C/C2=CC=C(N(C)C)C=C2</chem>                  | 10.1021/jm101404k | 18.5                | 0.9        | [ <sup>125</sup> I]IMPY |
| Cui2011-33 | <chem>O=C(/C=C/C1=C(Cl)C=CC=C1F)/C=C/C2=CC=C(N(C)C)C=C2</chem>                   | 10.1021/jm101404k | 9.2                 | 1          | [ <sup>125</sup> I]IMPY |
| Cui2011-34 | <chem>O=C(/C=C/C1=CC(C(F)(F)F)=CC(C(F)(F)F)=C1)/C=C/C2=CC=C(N(C)C)C=C2</chem>    | 10.1021/jm101404k | 4                   | 0.5        | [ <sup>125</sup> I]IMPY |
| Cui2011-35 | <chem>O=C(/C=C/C1=CC=C(OC)C(OC)=C1)/C=C/C2=CC=C(N(C)C)C=C2</chem>                | 10.1021/jm101404k | 5.4                 | 0.9        | [ <sup>125</sup> I]IMPY |
| Cui2011-36 | <chem>O=C(/C=C/C1=CC(OC)=CC(OC)=C1)/C=C/C2=CC=C(N(C)C)C=C2</chem>                | 10.1021/jm101404k | 4.7                 | 2.1        | [ <sup>125</sup> I]IMPY |

| Compound   | SMILES                                                                                             | DOI               | K <sub>i</sub> / nM | Error / nM | K <sub>i</sub> against  |
|------------|----------------------------------------------------------------------------------------------------|-------------------|---------------------|------------|-------------------------|
| Cui2011-37 | <chem>O=C(/C=C/C1=CC=C(OC)C=C1OC)/C=C/C2=CC=C(N(C)C)C=C2</chem>                                    | 10.1021/jm101404k | 2.8                 | 0.8        | [ <sup>125</sup> I]IMPY |
| Cui2011-38 | <chem>O=C(/C=C/C1=CC(OC)=C(OC)C(OC)=C1)/C=C/C2=CC=C(N(C)C)C=C2</chem>                              | 10.1021/jm101404k | 5.2                 | 0.6        | [ <sup>125</sup> I]IMPY |
| Cui2011-39 | <chem>O=C(/C=C/C1=C(OC)C=C(OC)C=C1OC)/C=C/C2=CC=C(N(C)C)C=C2</chem>                                | 10.1021/jm101404k | 39.1                | 4.8        | [ <sup>125</sup> I]IMPY |
| Cui2011-40 | <chem>O=C(/C=C/C1=CC=C(OC2=CC=CC=C2)C(OC)=C1)/C=C/C3=CC=C(N(C)C)C=C3</chem>                        | 10.1021/jm101404k | 4.1                 | 0.4        | [ <sup>125</sup> I]IMPY |
| Cui2011-41 | <chem>O=C(/C=C/C1=CC(Br)=CC=C1O)/C=C/C2=CC=C(N(C)C)C=C2</chem>                                     | 10.1021/jm101404k | 16.2                | 5.1        | [ <sup>125</sup> I]IMPY |
| Cui2011-42 | <chem>O=C(/C=C/C1=CC=CC(OC2=CC=CC=C2)=C1)/C=C/C3=CC=C(N(C)C)C=C3</chem>                            | 10.1021/jm101404k | 3.8                 | 1.1        | [ <sup>125</sup> I]IMPY |
| Cui2011-43 | <chem>O=C(/C=C/C1=CC([N+])([O-])=O)CC=C1OCC2=CC=CC=C2)/C=C/C3=CC=C(N(C)C)C=C3</chem>               | 10.1021/jm101404k | 33.3                | 3.8        | [ <sup>125</sup> I]IMPY |
| Cui2011-44 | <chem>O=C(/C=C/C1=CC=C(OC(C2=CC=CC=C2)(C3=CC=CC=C3)C4=CC=CC=C4)C=C1)/C=C/C5=CC=C(N(C)C)C=C5</chem> | 10.1021/jm101404k | 2.8                 | 0.4        | [ <sup>125</sup> I]IMPY |
| Cui2011-45 | <chem>O=C(/C=C/C1=CN=C(Cl)C=C1)/C=C/C2=CC=C(N(C)C)C=C2</chem>                                      | 10.1021/jm101404k | 2.2                 | 0.3        | [ <sup>125</sup> I]IMPY |
| Cui2011-46 | <chem>O=C(/C=C/C1=CN=C(Br)C=C1)/C=C/C2=CC=C(N(C)C)C=C2</chem>                                      | 10.1021/jm101404k | 2.3                 | 0.1        | [ <sup>125</sup> I]IMPY |
| Cui2011-47 | <chem>O=C(/C=C/C1=CN=C(I)C=C1)/C=C/C2=CC=C(N(C)C)C=C2</chem>                                       | 10.1021/jm101404k | 4.8                 | 1.3        | [ <sup>125</sup> I]IMPY |
| Cui2011-48 | <chem>O=C(/C=C/C1=CC=CC=N1)/C=C/C2=CC=C(N(C)C)C=C2</chem>                                          | 10.1021/jm101404k | 23                  | 1.6        | [ <sup>125</sup> I]IMPY |
| Cui2011-49 | <chem>O=C(/C=C/C1=CC=CN1)/C=C/C2=CC=C(N(C)C)C=C2</chem>                                            | 10.1021/jm101404k | 5.8                 | 1.2        | [ <sup>125</sup> I]IMPY |
| Cui2011-50 | <chem>O=C(/C=C/C1=CC=CO1)/C=C/C2=CC=C(N(C)C)C=C2</chem>                                            | 10.1021/jm101404k | 8.5                 | 0.8        | [ <sup>125</sup> I]IMPY |
| Cui2011-51 | <chem>O=C(/C=C/C1=CC=CS1)/C=C/C2=CC=C(N(C)C)C=C2</chem>                                            | 10.1021/jm101404k | 5.3                 | 0.5        | [ <sup>125</sup> I]IMPY |
| Cui2011-52 | <chem>O=C(/C=C/C1=CC=C(Br)S1)/C=C/C2=CC=C(N(C)C)C=C2</chem>                                        | 10.1021/jm101404k | 3.8                 | 0.4        | [ <sup>125</sup> I]IMPY |
| Cui2011-53 | <chem>O=C(/C=C/C1=CC=C(C2=CC=C(Br)S2)S1)/C=C/C3=CC=C(N(C)C)C=C3</chem>                             | 10.1021/jm101404k | 11.7                | 1.1        | [ <sup>125</sup> I]IMPY |
| Cui2011-54 | <chem>O=C(/C=C/C1=CC=C(OCO2)C2=C1)/C=C/C3=CC=C(N(C)C)C=C3</chem>                                   | 10.1021/jm101404k | 1.8                 | 0.2        | [ <sup>125</sup> I]IMPY |
| Cui2011-55 | <chem>O=C(/C=C/C1=CC=C(NC=C2)C2=C1)/C=C/C3=CC=C(N(C)C)C=C3</chem>                                  | 10.1021/jm101404k | 4.2                 | 0.4        | [ <sup>125</sup> I]IMPY |
| Cui2011-56 | <chem>O=C(/C=C/C1=CC=C(C=C(OC)C=C2)C2=C1)/C=C/C3=CC=C(N(C)C)C=C3</chem>                            | 10.1021/jm101404k | 2.5                 | 0.2        | [ <sup>125</sup> I]IMPY |
| Cui2011-57 | <chem>O=C(/C=C/C1=CC=CC=C1)/C=C/C2=CC=C(N(C)C)C=C2.[Fe].c3ccc3</chem>                              | 10.1021/jm101404k | 21.1                | 1.2        | [ <sup>125</sup> I]IMPY |
| Cui2011-58 | <chem>O=C(/C=C/C1=CC=CC=C1)/C=C/C2=CC=CC=C2</chem>                                                 | 10.1021/jm101404k | 242.5               | 42.8       | [ <sup>125</sup> I]IMPY |
| Cui2011-59 | <chem>O=C(/C=C/C1=CC=C(Cl)C=C1)/C=C/C2=CC=C(Cl)C=C2</chem>                                         | 10.1021/jm101404k | 9                   | 1.2        | [ <sup>125</sup> I]IMPY |
| Cui2011-60 | <chem>O=C(/C=C/C1=CC=C(OC)C=C1)/C=C/C2=CC=C(OC)C=C2</chem>                                         | 10.1021/jm101404k | 6.5                 | 1.2        | [ <sup>125</sup> I]IMPY |
| Cui2011-61 | <chem>O=C(/C1=C/C2=CC=CC=C2)/C(CCC1)=C/C3=CC=CC=C3</chem>                                          | 10.1021/jm101404k | 704.3               | 90.3       | [ <sup>125</sup> I]IMPY |

| Compound    | SMILES                                                                       | DOI                       | K <sub>i</sub> / nM | Error / nM | K <sub>i</sub> against  |
|-------------|------------------------------------------------------------------------------|---------------------------|---------------------|------------|-------------------------|
| Cui2011-62  | <chem>O=C(/C1=C/C2=CC=C(Cl)C=C2)/C(CCC1)=C/C3=CC=C(Cl)C=C3</chem>            | 10.1021/jm101404k         | 11.4                | 0.8        | [ <sup>125</sup> I]IMPY |
| Cui2011-63  | <chem>O=C(/C1=C/C2=CC=C(OC)C=C2)/C(CCC1)=C/C3=CC=C(OC)C=C3</chem>            | 10.1021/jm101404k         | 24.8                | 2.5        | [ <sup>125</sup> I]IMPY |
| Cui2011-64  | <chem>O=C(/C1=C/C2=CC=C(N(C)C)C=C2)/C(CCC1)=C/C3=CC=C(N(C)C)C=C3</chem>      | 10.1021/jm101404k         | 1                   | 0.3        | [ <sup>125</sup> I]IMPY |
| Cui2011-70  | <chem>O=C(/C=C/C1=CC=C(I)C=C1)/C=C/C2=CC=C(N)C=C2</chem>                     | 10.1021/jm101404k         | 7                   | 2.2        | [ <sup>125</sup> I]IMPY |
| Cui2011-71  | <chem>O=C(/C=C/C1=CC=C(I)C=C1)/C=C/C2=CC=C(N)C=C2</chem>                     | 10.1021/jm101404k         | 2.8                 | 0.5        | [ <sup>125</sup> I]IMPY |
| Cui2011-81  | <chem>O=C(/C1=C/C2=CC=C(N(C)C)C=C2)/C(CCC1)=C/C3=CC=C(OCCF)C=C3</chem>       | 10.1021/jm101404k         | 5.6                 | 2.5        | [ <sup>125</sup> I]IMPY |
| Cui2011-82  | <chem>O=C(/C1=C/C2=CC=C(N(C)C)C=C2)/C(CCC1)=C/C3=CC=C(OCCOCCF)C=C3</chem>    | 10.1021/jm101404k         | 4.4                 | 1.3        | [ <sup>125</sup> I]IMPY |
| Cui2011-83  | <chem>O=C(/C1=C/C2=CC=C(N(C)C)C=C2)/C(CCC1)=C/C3=CC=C(OCCOCCOCCF)C=C3</chem> | 10.1021/jm101404k         | 6.9                 | 1.4        | [ <sup>125</sup> I]IMPY |
| Cui2011-85  | <chem>O=C(/C1=C/C2=CC=C(NC)C=C2)/C(CCC1)=C/C3=CC=C(OCCOCCOCCF)C=C3</chem>    | 10.1021/jm101404k         | 8.6                 | 1.3        | [ <sup>125</sup> I]IMPY |
| Ono2007b-04 | <chem>NC1=CC=C(C(/C=C/C2=CC=C(I)C=C2)=O)C=C1</chem>                          | 10.1016/j.bmc.2007.06.055 | 248                 | 56         | [ <sup>125</sup> I]DMIC |
| Ono2007b-07 | <chem>CNC1=CC=C(C(/C=C/C2=CC=C(I)C=C2)=O)C=C1</chem>                         | 10.1016/j.bmc.2007.06.055 | 23.9                | 3.6        | [ <sup>125</sup> I]DMIC |
| Ono2007b-10 | <chem>CN(C)C1=CC=C(C(/C=C/C2=CC=C(I)C=C2)=O)C=C1</chem>                      | 10.1016/j.bmc.2007.06.055 | 13.3                | 1.9        | [ <sup>125</sup> I]DMIC |
| Ono2007b-14 | <b>O=C(/C=C/C1=CC=C(N(C)C)C=C1)C2=CC=C(I)S2</b>                              | 10.1016/j.bmc.2007.06.055 | 3.9                 | 0.4        | [ <sup>125</sup> I]DMIC |
| Ono2007b-16 | <chem>O=C(/C=C/C1=CC=CC=C1)C2=CC=C(I)C=C2</chem>                             | 10.1016/j.bmc.2007.06.055 | 151                 | 16         | [ <sup>125</sup> I]DMIC |
| Ono2007b-17 | <chem>O=C(/C=C/C1=CC=CO1)C2=CC=C(I)C=C2</chem>                               | 10.1016/j.bmc.2007.06.055 | 908                 | 212        | [ <sup>125</sup> I]DMIC |
| Ono2007b-18 | <chem>O=C(/C=C/C1=COC=C1)C2=CC=C(I)C=C2</chem>                               | 10.1016/j.bmc.2007.06.055 | 125                 | 9.2        | [ <sup>125</sup> I]DMIC |
| Ono2007b-19 | <chem>O=C(/C=C/C1=CC=CS1)C2=CC=C(I)C=C2</chem>                               | 10.1016/j.bmc.2007.06.055 | 102                 | 16         | [ <sup>125</sup> I]DMIC |
| Ono2007b-20 | <chem>O=C(/C=C/C1=CSC=C1)C2=CC=C(I)C=C2</chem>                               | 10.1016/j.bmc.2007.06.055 | 93                  | 11         | [ <sup>125</sup> I]DMIC |
| Ono2007b-21 | <chem>O=C(/C=C/C1=NC=CN1)C2=CC=C(I)C=C2</chem>                               | 10.1016/j.bmc.2007.06.055 | 797                 | 316        | [ <sup>125</sup> I]DMIC |
| Ono2007b-22 | <chem>O=C(/C=C/C1=NC=CS1)C2=CC=C(I)C=C2</chem>                               | 10.1016/j.bmc.2007.06.055 | >10000              |            | [ <sup>125</sup> I]DMIC |
| Ono2007b-23 | <chem>O=C(/C=C/C1=CC=C(N(C)C)O1)C2=CC=C(I)C=C2</chem>                        | 10.1016/j.bmc.2007.06.055 | 1132                | 344        | [ <sup>125</sup> I]DMIC |
| Ono2007b-24 | <chem>O=C(/C=C/C1=CC=C(N(C)C)S1)C2=CC=C(I)C=C2</chem>                        | 10.1016/j.bmc.2007.06.055 | 113                 | 10         | [ <sup>125</sup> I]DMIC |
| Ono2007b-25 | <chem>O=C(/C=C/C1=CC=C(N(C)C)S1)C2=CC=C(I)S2</chem>                          | 10.1016/j.bmc.2007.06.055 | 137                 | 3.4        | [ <sup>125</sup> I]DMIC |
| Ono2007b-26 | <chem>O=C(/C=C/C1=CC=C(N(C)C)O1)C2=CC=C(I)S2</chem>                          | 10.1016/j.bmc.2007.06.055 | 1608                | 85         | [ <sup>125</sup> I]DMIC |
| Ono2007b-27 | <chem>O=C(/C=C/C1=CC=C(N(C)C)C=C1)C2=CC=C(Br)O2</chem>                       | 10.1016/j.bmc.2007.06.055 | 126                 | 13         | [ <sup>125</sup> I]DMIC |
| Ono2007b-28 | <chem>O=C(/C=C/C1=CC=C(N(C)C)S1)C2=CC=C(Br)O2</chem>                         | 10.1016/j.bmc.2007.06.055 | 2648                | 222        | [ <sup>125</sup> I]DMIC |



| Compound         | SMILES                                                                                                                          | DOI                           | K <sub>i</sub> / nM | Error / nM | K <sub>i</sub> against  |
|------------------|---------------------------------------------------------------------------------------------------------------------------------|-------------------------------|---------------------|------------|-------------------------|
| Ono2007b-29      | <chem>O=C(/C=C/C1=CC=C(N(C)C)O1)C2=CC=C(Br)O2</chem>                                                                            | 10.1016/j.bmc.2007.06.055     | >10000              |            | [ <sup>125</sup> I]DMIC |
| Ono2007b-31      | <chem>O=C(/C=C/C1=CC=C(N)C=C1)C2=CC=C(I)S2</chem>                                                                               | 10.1016/j.bmc.2007.06.055     | 121                 | 40         | [ <sup>125</sup> I]DMIC |
| Ono2007b-32      | <chem>O=C(/C=C/C1=CC=C(Br)S1)C2=CC=C(N)C=C2</chem>                                                                              | 10.1016/j.bmc.2007.06.055     | 476                 | 48         | [ <sup>125</sup> I]DMIC |
| Ono2007b-34      | <chem>O=C(/C=C/C1=CC=C(NC)C=C1)C2=CC=C(I)S2</chem>                                                                              | 10.1016/j.bmc.2007.06.055     | 14.1                | 0.6        | [ <sup>125</sup> I]DMIC |
| Ono2007b-35      | <chem>O=C(/C=C/C1=CC=C(Br)S1)C2=CC=C(NC)C=C2</chem>                                                                             | 10.1016/j.bmc.2007.06.055     | 198                 | 49         | [ <sup>125</sup> I]DMIC |
| Ono2007b-36      | <chem>O=C(/C=C/C1=CC=C(Br)S1)C2=CC=C(N(C)C)C=C2</chem>                                                                          | 10.1016/j.bmc.2007.06.055     | 106                 | 7.1        | [ <sup>125</sup> I]DMIC |
| CR               | <chem>CC1=CC(C2=CC=C(/N=N/C3=CC(S(=O)([O-])=O)=C(C=CC=C4)C4=C3N)C(C)=C2)=CC=C1/N=N/C5=CC(S(=O)([O-])=O)=C(C=CC=C6)C6=C5N</chem> | 10.1016/j.bmc.2007.06.055     | >10000              |            | [ <sup>125</sup> I]DMIC |
| ThT              | <chem>OC1=CC=C([N+](C)=C(C2=CC=C(N(C)C)C=C2)S3)C3=C1</chem>                                                                     | 10.1016/j.bmc.2007.06.055     | >10000              |            | [ <sup>125</sup> I]DMIC |
| AIC              | <chem>IC1=CC=C(C(/C=C/C2=CC=C(N)C=C2)=O)C=C1</chem>                                                                             | 10.1016/j.bmc.2007.06.055     | 105                 | 12         | [ <sup>125</sup> I]DMIC |
| IMC              | <chem>IC1=CC=C(C(/C=C/C2=CC=C(NC)C=C2)=O)C=C1</chem>                                                                            | 10.1016/j.bmc.2007.06.055     | 6.3                 | 1.6        | [ <sup>125</sup> I]DMIC |
| DMIC             | <chem>IC1=CC=C(C(/C=C/C2=CC=C(N(C)C)C=C2)=O)C=C1</chem>                                                                         | 10.1016/j.bmc.2007.06.055     | 2.9                 | 0.3        | [ <sup>125</sup> I]DMIC |
| Jia2016-S5       | <chem>IC(C=C1)=CC=C1OC[C@H](O)COC(C=C2)=CC=C2OC</chem>                                                                          | 10.1021/acschemn euro.6b00155 | 34                  | 2.7        | [ <sup>125</sup> I]IMPY |
| Jia2016-R5       | <chem>IC1=CC=C(OC[C@H](O)COC2=CC=C(OC)C=C2)C=C1</chem>                                                                          | 10.1021/acschemn euro.6b00155 | 25                  | 1.3        | [ <sup>125</sup> I]IMPY |
| Jia2016-S8       | <chem>IC(C=C1)=CC=C1OC[C@H](O)COC(C=C2)=CC=C2N(C)C</chem>                                                                       | 10.1021/acschemn euro.6b00155 | 45                  | 13         | [ <sup>125</sup> I]IMPY |
| Jia2016-R8       | <chem>IC1=CC=C(OC[C@H](O)COC2=CC=C(N(C)C)C=C2)C=C1</chem>                                                                       | 10.1021/acschemn euro.6b00155 | 15.8                | 11.5       | [ <sup>125</sup> I]IMPY |
| IMPY             | <chem>IC1=CN2C(C=C1)=NC(C3=CC=C(N(C)C)C=C3)=C2</chem>                                                                           | 10.1021/acschemn euro.6b00155 | 25.3                | 2.6        | [ <sup>125</sup> I]IMPY |
| Ono2007d-04      | <chem>IC1=CC=C(C(/C=C/C2=CC=C(N)C=C2)=O)C=C1</chem>                                                                             | 10.1016/j.bmc.2007.07.052     | 104.7               | 12         | [ <sup>125</sup> I]DMIC |
| Ono2007d-07      | <chem>IC1=CC=C(C(/C=C/C2=CC=C(NC)C=C2)=O)C=C1</chem>                                                                            | 10.1016/j.bmc.2007.07.052     | 6.3                 | 1.6        | [ <sup>125</sup> I]DMIC |
| Ono2007d-14      | <chem>IC1=CC=C(C(/C=C/C2=CC=C(OC)C=C2)=O)C=C1</chem>                                                                            | 10.1016/j.bmc.2007.07.052     | 6.3                 | 1.7        | [ <sup>125</sup> I]DMIC |
| Ono2007d-16      | <chem>IC1=CC=C(C(/C=C/C2=CC=C(O)C=C2)=O)C=C1</chem>                                                                             | 10.1016/j.bmc.2007.07.052     | 21.4                | 1.4        | [ <sup>125</sup> I]DMIC |
| ThT              | <chem>OC1=CC=C([N+](C)=C(C2=CC=C(N(C)C)C=C2)S3)C3=C1</chem>                                                                     | 10.1016/j.bmc.2007.07.052     | >10000              |            | [ <sup>125</sup> I]DMIC |
| CR               | <chem>CC1=CC(C2=CC=C(/N=N/C3=CC(S(=O)([O-])=O)=C(C=CC=C4)C4=C3N)C(C)=C2)=CC=C1/N=N/C5=CC(S(=O)([O-])=O)=C(C=CC=C6)C6=C5N</chem> | 10.1016/j.bmc.2007.07.052     | >10000              |            | [ <sup>125</sup> I]DMIC |
| Watanabe2010a-05 | <chem>IC1=CC=C(NC(C2=CC=C(NC)C=C2)=C3)C3=C1</chem>                                                                              | 10.1016/j.bmc.2010.05.013     | 27                  | 0.18       | [ <sup>125</sup> I]IMPY |
| Watanabe2010a-11 | <chem>IC1=CC=C(NC(C2=CC=C(N(C)C)C=C2)=C3)C3=C1</chem>                                                                           | 10.1016/j.bmc.2010.05.013     | 4.24                | 0.71       | [ <sup>125</sup> I]IMPY |
| Watanabe2010a-14 | <chem>IC1=CC=C(NC(C2=CC=C(OC)C=C2)=C3)C3=C1</chem>                                                                              | 10.1016/j.bmc.2010.05.013     | 20.2                | 5.15       | [ <sup>125</sup> I]IMPY |

| Compound              | SMILES                                                             | DOI                              | K <sub>i</sub> / nM | Error / nM | K <sub>i</sub> against  |
|-----------------------|--------------------------------------------------------------------|----------------------------------|---------------------|------------|-------------------------|
| Watanabe2<br>010a-15  | <chem>IC1=CC=C(NC(C2=CC=C(O)C=C2)=C3)C3=C1</chem>                  | 10.1016/j.bmc.201<br>0.05.013    | 32.9                | 2.93       | [ <sup>125</sup> I]IMPY |
| Watanabe2<br>010a-16  | <chem>IC1=CC=C(NC(C2=CC=C(OCCO)C=C2)=C3)C3=C1</chem>               | 10.1016/j.bmc.201<br>0.05.013    | 25.9                | 5.13       | [ <sup>125</sup> I]IMPY |
| Watanabe2<br>010a-22  | <chem>IC1=CC=C(N(C2=CC=C(N(C)C)C=C2)C=C3)C3=C1</chem>              | 10.1016/j.bmc.201<br>0.05.013    | >10000              |            | [ <sup>125</sup> I]IMPY |
| Lee2011a-<br>01       | <chem>FC1=CC=C(N=C(C2=CN=C(N)C=C2)S3)C3=C1</chem>                  | 10.1016/j.bmc.201<br>1.03.029    | 26.2                |            | [ <sup>125</sup> I]TZDM |
| Lee2011a-<br>02       | <chem>FC1=CC=C(N=C(C2=CN=C(NC)C=C2)S3)C3=C1</chem>                 | 10.1016/j.bmc.201<br>1.03.029    | 5.5                 | 0.2        | [ <sup>125</sup> I]TZDM |
| Lee2011a-<br>03       | <chem>FC1=CC=C(N=C(C2=CN=C(N(C)C)C=C2)S3)C3=C1</chem>              | 10.1016/j.bmc.201<br>1.03.029    | 5.9                 | 0.3        | [ <sup>125</sup> I]TZDM |
| PiB                   | <chem>CNc1ccc(-c2nc3ccc(O)cc3s2)cc1</chem>                         | 10.1016/j.bmc.201<br>1.03.029    | 5.8                 | 1.6        | [ <sup>125</sup> I]TZDM |
| Fuchigami2<br>013a-05 | <chem>IC1=CC=C(C(NC(CCCN(CC)CC)C)=C(C=C(OC)C=C2)C2=N3)C3=C1</chem> | 10.1016/j.ejmech.2<br>012.12.020 | 353                 | 81.5       | [ <sup>125</sup> I]IMPY |
| Fuchigami2<br>013a-12 | <chem>IC1=CC=C(C(N(C)C)=C(C=C(OC)C=C2)C2=N3)C3=C1</chem>           | 10.1016/j.ejmech.2<br>012.12.020 | 121                 | 80.2       | [ <sup>125</sup> I]IMPY |
| Fuchigami2<br>013a-13 | <chem>IC1=CC=C(C(NC)=C(C=C(OC)C=C2)C2=N3)C3=C1</chem>              | 10.1016/j.ejmech.2<br>012.12.020 | 13.8                | 10.8       | [ <sup>125</sup> I]IMPY |
| Fuchigami2<br>013a-14 | <chem>IC1=CC=C(C(N)=C(C=C(OC)C=C2)C2=N3)C3=C1</chem>               | 10.1016/j.ejmech.2<br>012.12.020 | 83.6                | 30.7       | [ <sup>125</sup> I]IMPY |
| Fuchigami2<br>013a-25 | <chem>IC1=CC=C(C(OC)=C(C=C(OC)C=C2)C2=N3)C3=C1</chem>              | 10.1016/j.ejmech.2<br>012.12.020 | 28.9                | 7.97       | [ <sup>125</sup> I]IMPY |
| Fuchigami2<br>013a-26 | <chem>IC1=CC=C(C(OC)=C(C=C(N(C)C)C=C2)C2=N3)C3=C1</chem>           | 10.1016/j.ejmech.2<br>012.12.020 | 39.2                | 18.1       | [ <sup>125</sup> I]IMPY |
| Fuchigami2<br>013a-27 | <chem>IC1=CC=C(C(OC)=C(C=CC=C2)C2=N3)C3=C1</chem>                  | 10.1016/j.ejmech.2<br>012.12.020 | >10000              |            | [ <sup>125</sup> I]IMPY |
| IMPY                  | <chem>IC1=CN2C(C=C1)=NC(C3=CC=C(N(C)C)C=C3)=C2</chem>              | 10.1016/j.ejmech.2<br>012.12.020 | 8                   | 1.1        | [ <sup>125</sup> I]IMPY |
| PQ-1                  | <chem>FCCOC1=CC2=C(N=CC(C3=CC=C(N)C=C3)=N2)C=C1</chem>             | 10.1021/ml400070<br>7            | 1180                | 370        | [ <sup>125</sup> I]IMPY |
| PQ-2                  | <chem>FCCOC1=CC2=C(N=CC(C3=CC=C(NC)C=C3)=N2)C=C1</chem>            | 10.1021/ml400070<br>7            | 758                 | 83.8       | [ <sup>125</sup> I]IMPY |
| PQ-3                  | <chem>FCCOC1=CC2=C(N=CC(C3=CC=C(N(C)C)C=C3)=N2)C=C1</chem>         | 10.1021/ml400070<br>7            | 111                 | 13.2       | [ <sup>125</sup> I]IMPY |
| PQ-4                  | <chem>C1=CC2=C(N=CC(C3=CC=C(N)C=C3)=N2)C=C1OCCF</chem>             | 10.1021/ml400070<br>7            | 242                 | 29         | [ <sup>125</sup> I]IMPY |
| PQ-5                  | <chem>C1=CC2=C(N=CC(C3=CC=C(NC)C=C3)=N2)C=C1OCCF</chem>            | 10.1021/ml400070<br>7            | 15.7                | 1.28       | [ <sup>125</sup> I]IMPY |
| PQ-6                  | <chem>C1=CC2=C(N=CC(C3=CC=C(N(C)C)C=C3)=N2)C=C1OCCF</chem>         | 10.1021/ml400070<br>7            | 0.895               | 0.141      | [ <sup>125</sup> I]IMPY |
| AV-45                 | <chem>FCCOCCOCCOC(C=C1)=NC=C1/C=C/C(C=C2)=CC=C2NC</chem>           | 10.1021/ml400070<br>7            | 12.8                | 2.1        | [ <sup>125</sup> I]IMPY |
| IMPY                  | <chem>IC1=CN2C(C=C1)=NC(C3=CC=C(N(C)C)C=C3)=C2</chem>              | 10.1021/ml400070<br>7            | 7.21                | 1.23       | [ <sup>125</sup> I]IMPY |
| Fu2013-01a            | <chem>CN(CCF)C(C=C1)=CC=C1C2=CC3=CC=CC=C3N2</chem>                 | 10.1016/j.bmc.201<br>3.04.028    | 28.4                | 7.4        | [ <sup>125</sup> I]IMPY |
| Fu2013-02a            | <chem>CN(CCCF)C(C=C1)=CC=C1C2=CC3=CC=CC=C3N2</chem>                | 10.1016/j.bmc.201<br>3.04.028    | 31.5                | 11.3       | [ <sup>125</sup> I]IMPY |
| Fu2013-03a            | <chem>CN(CCF)C(C=C1)=CC=C1C2=CC3=CC=CC=C3N(C)2</chem>              | 10.1016/j.bmc.201<br>3.04.028    | 116.8               | 35.9       | [ <sup>125</sup> I]IMPY |

| Compound         | SMILES                                                 | DOI                       | K <sub>i</sub> / nM | Error / nM | K <sub>i</sub> against          |
|------------------|--------------------------------------------------------|---------------------------|---------------------|------------|---------------------------------|
| Fu2013-04a       | <chem>CN(CCCF)C(C=C1)=CC=C1C2=CC3=CC=CC=C3N(C)2</chem> | 10.1016/j.bmc.2013.04.028 | 79.7                | 31.2       | [ <sup>125</sup> I]IMPY         |
| Fu2013-05a       | <chem>N(CCF)C(C=C1)=CC=C1C2=CC3=CC=CC=C3N(C)2</chem>   | 10.1016/j.bmc.2013.04.028 | 1030.1              | 375.2      | [ <sup>125</sup> I]IMPY         |
| Fu2013-06a       | <chem>N(CCCF)C(C=C1)=CC=C1C2=CC3=CC=CC=C3N(C)2</chem>  | 10.1016/j.bmc.2013.04.028 | 1097.8              | 171.6      | [ <sup>125</sup> I]IMPY         |
| Watanabe2013b-03 | <chem>CN(C)c1ccc(-c2nnc(-c3ccc(l)cc3)o2)cn1</chem>     | 10.1039/C3MD00189J        | 24.8                | 2.81       | [ <sup>125</sup> I]IMPY         |
| Watanabe2013b-06 | <chem>CN(C)c1ccc(-c2nnc(-c3cccc(l)c3)o2)cn1</chem>     | 10.1039/C3MD00189J        | 13.6                | 3.71       | [ <sup>125</sup> I]IMPY         |
| 1,3,4-DPOD-DM    | <chem>CN(C)c1ccc(-c2nnc(-c3ccc(l)cc3)o2)cc1</chem>     | 10.1039/C3MD00189J        | 3.91                | 0.98       | [ <sup>125</sup> I]IMPY         |
| IMPY             | <chem>CN(C)c1ccc(-c2cn3cc(l)ccc3n2)cc1</chem>          | 10.1039/C3MD00189J        | 3.05                | 0.46       | [ <sup>125</sup> I]IMPY         |
| BOB-4            | <chem>COc1ccc(OCc2ccc(l)cc2)cc1</chem>                 | 10.1021/jm5004396         | 24.3                | 6.8        | [ <sup>125</sup> I]Yang2014a-04 |
| Yang2014a-05     | <chem>COc1cccc(OCc2ccc(l)cc2)c1</chem>                 | 10.1021/jm5004396         | 130.6               | 4.8        | [ <sup>125</sup> I]Yang2014a-04 |
| Yang2014a-06     | <chem>COc1cccc1OCc1ccc(l)cc1</chem>                    | 10.1021/jm5004396         | 5164.8              | 410.6      | [ <sup>125</sup> I]Yang2014a-04 |
| Yang2014a-07     | <chem>Oc1ccc(OCc2ccc(l)cc2)cc1</chem>                  | 10.1021/jm5004396         | 113.4               | 23.8       | [ <sup>125</sup> I]Yang2014a-04 |
| Yang2014a-08     | <chem>Oc1cccc(OCc2ccc(l)cc2)c1</chem>                  | 10.1021/jm5004396         | 385.6               | 114.2      | [ <sup>125</sup> I]Yang2014a-04 |
| Yang2014a-09     | <chem>Oc1cccc1OCc1ccc(l)cc1</chem>                     | 10.1021/jm5004396         | 2831.2              | 517        | [ <sup>125</sup> I]Yang2014a-04 |
| Yang2014a-10     | <chem>Fc1ccc(OCc2ccc(l)cc2)cc1</chem>                  | 10.1021/jm5004396         | 107.1               | 15.4       | [ <sup>125</sup> I]Yang2014a-04 |
| Yang2014a-11     | <chem>Clc1ccc(OCc2ccc(l)cc2)cc1</chem>                 | 10.1021/jm5004396         | 18.8                | 2.2        | [ <sup>125</sup> I]Yang2014a-04 |
| Yang2014a-12     | <chem>Brc1ccc(OCc2ccc(l)cc2)cc1</chem>                 | 10.1021/jm5004396         | 12                  | 1          | [ <sup>125</sup> I]Yang2014a-04 |
| Yang2014a-13     | <chem>lc1ccc(COc2ccc(l)cc2)cc1</chem>                  | 10.1021/jm5004396         | 21.9                | 2.1        | [ <sup>125</sup> I]Yang2014a-04 |
| Yang2014a-14     | <chem>lc1ccc(COc2cccc2)cc1</chem>                      | 10.1021/jm5004396         | 79.4                | 5.2        | [ <sup>125</sup> I]Yang2014a-04 |
| Yang2014a-15     | <chem>CC(C)(C)c1ccc(OCc2ccc(l)cc2)cc1</chem>           | 10.1021/jm5004396         | 117.6               | 17.7       | [ <sup>125</sup> I]Yang2014a-04 |
| Yang2014a-16     | <chem>Nc1ccc(OCc2ccc(l)cc2)cc1</chem>                  | 10.1021/jm5004396         | 409.2               | 45         | [ <sup>125</sup> I]Yang2014a-04 |
| Yang2014a-17     | <chem>Nc1cccc(OCc2ccc(l)cc2)c1</chem>                  | 10.1021/jm5004396         | 1534.7              | 159.7      | [ <sup>125</sup> I]Yang2014a-04 |
| Yang2014a-18     | <chem>Nc1cccc1OCc1ccc(l)cc1</chem>                     | 10.1021/jm5004396         | 1028                | 49         | [ <sup>125</sup> I]Yang2014a-04 |
| Yang2014a-19     | <chem>CNc1ccc(OCc2ccc(l)cc2)cc1</chem>                 | 10.1021/jm5004396         | 48.2                | 4.3        | [ <sup>125</sup> I]Yang2014a-04 |
| Yang2014a-20     | <chem>CNc1cccc(OCc2ccc(l)cc2)c1</chem>                 | 10.1021/jm5004396         | 593.6               | 78.2       | [ <sup>125</sup> I]Yang2014a-04 |
| Yang2014a-21     | <chem>CNc1cccc1OCc1ccc(l)cc1</chem>                    | 10.1021/jm5004396         | 20662               | 2653       | [ <sup>125</sup> I]Yang2014a-04 |
| Yang2014a-22     | <chem>CN(C)c1ccc(OCc2ccc(l)cc2)cc1</chem>              | 10.1021/jm5004396         | 17.6                | 1.6        | [ <sup>125</sup> I]Yang2014a-04 |

| Compound      | SMILES                                                             | DOI                          | K <sub>i</sub> / nM | Error / nM | K <sub>i</sub> against          |
|---------------|--------------------------------------------------------------------|------------------------------|---------------------|------------|---------------------------------|
| Yang2014a-23  | <chem>CN(C)c1cccc(OCc2ccc(I)cc2)c1</chem>                          | 10.1021/jm5004396            | 894.2               | 88         | [ <sup>125</sup> I]Yang2014a-04 |
| Yang2014a-24  | <chem>COc1ccc(COc2ccc(I)cc2)cc1</chem>                             | 10.1021/jm5004396            | 49.4                | 3          | [ <sup>125</sup> I]Yang2014a-04 |
| Yang2014a-25  | <chem>COc1ccc(SCc2ccc(I)cc2)cc1</chem>                             | 10.1021/jm5004396            | 530.2               | 109.4      | [ <sup>125</sup> I]Yang2014a-04 |
| IMPY          | <chem>CN(C)c1ccc(-c2cn3cc(I)ccc3n2)cc1</chem>                      | 10.1021/jm5004396            | 32.2                | 2.1        | [ <sup>125</sup> I]BOB-4        |
| PIB           | <chem>CNc1ccc(-c2nc3ccc(O)cc3s2)cc1</chem>                         | 10.1021/jm5004396            | 38.8                | 2.6        | [ <sup>125</sup> I]BOB-4        |
| Yang2015a-05a | <chem>CN(C)c1ccc(COc2ccc(OCCF)cc2)cc1</chem>                       | 10.1016/j.ejmech.2015.09.028 | 25.7                | 2.6        | [ <sup>125</sup> I]BOB-4        |
| Yang2015a-05b | <chem>CN(C)c1ccc(COc2ccc(OCCOCCF)cc2)cc1</chem>                    | 10.1016/j.ejmech.2015.09.028 | 191.1               | 38.4       | [ <sup>125</sup> I]BOB-4        |
| Yang2015a-05c | <chem>CN(C)c1ccc(COc2ccc(OCCOCCOCCF)cc2)cc1</chem>                 | 10.1016/j.ejmech.2015.09.028 | 357.7               | 22.2       | [ <sup>125</sup> I]BOB-4        |
| Yang2015a-05d | <chem>COc1ccc(COc2ccc(OCCF)cc2)cc1</chem>                          | 10.1016/j.ejmech.2015.09.028 | 118.5               | 34.6       | [ <sup>125</sup> I]BOB-4        |
| Yang2015a-05e | <chem>COc1ccc(COc2ccc(OCCOCCF)cc2)cc1</chem>                       | 10.1016/j.ejmech.2015.09.028 | 437.9               | 36.7       | [ <sup>125</sup> I]BOB-4        |
| Yang2015a-05f | <chem>COc1ccc(COc2ccc(OCCOCCOCCF)cc2)cc1</chem>                    | 10.1016/j.ejmech.2015.09.028 | 770.1               | 95         | [ <sup>125</sup> I]BOB-4        |
| Yang2015a-09a | <chem>CN(C)c1ccc(OCc2ccc(OCCF)cc2)cc1</chem>                       | 10.1016/j.ejmech.2015.09.028 | 21                  | 4.9        | [ <sup>125</sup> I]BOB-4        |
| Yang2015a-09b | <chem>COc1ccc(OCc2ccc(OCCF)cc2)cc1</chem>                          | 10.1016/j.ejmech.2015.09.028 | 152.6               | 31.6       | [ <sup>125</sup> I]BOB-4        |
| AV-45         | <chem>CNc1ccc(/C=C/c2ccc(OCCOCCOCCF)nc2)cc1</chem>                 | 10.1016/j.ejmech.2015.09.028 | 11.4                | 1.1        | [ <sup>125</sup> I]BOB-4        |
| Yang2015b-07a | <chem>Ic1ccc(COc2ccc(OCCF)cc2)cc1</chem>                           | 10.1038/srep12084            | 19.5                | 7.1        | [ <sup>125</sup> I]BOB-4        |
| Yang2015b-12a | <chem>Ic1ccc(OCc2ccc(OCCF)cc2)cc1</chem>                           | 10.1038/srep12084            | 23.9                | 7.9        | [ <sup>125</sup> I]BOB-4        |
| Yu2012-4a     | <chem>CNC1=CC=C(N=C(C2=CC=C(OCC[18F]))C=C2)C=N3)C3=C1</chem>       | 10.1016/j.ejmech.2012.08.031 | 10                  |            | [ <sup>125</sup> I]IMPY         |
| Yu2012-4b     | <chem>CNC1=CC=C(N=C(C2=CC=C(OCCOCCOCC[18F]))C=C2)C=N3)C3=C1</chem> | 10.1016/j.ejmech.2012.08.031 | 5.3                 |            | [ <sup>125</sup> I]IMPY         |
| Ono2013-07    | <chem>IC1=CC(C=C(C2=CC=C(N)N=C2)O3)=C3C=C1</chem>                  | 10.1371/journal.pone.0074104 | 10.3                | 1.48       | [ <sup>125</sup> I]IMPY         |
| Ono2013-08    | <chem>IC1=CC(C=C(C2=CC=C(NC)N=C2)O3)=C3C=C1</chem>                 | 10.1371/journal.pone.0074104 | 2.94                | 0.22       | [ <sup>125</sup> I]IMPY         |
| Ono2013-09    | <chem>IC1=CC(C=C(C2=CC=C(N(C)C)N=C2)O3)=C3C=C1</chem>              | 10.1371/journal.pone.0074104 | 2.36                | 0.53       | [ <sup>125</sup> I]IMPY         |
| Cui2010-06    | <chem>C1=CC(SC(C2=CC=C(C3=CC=CS3)S2)=N4)=C4C=C1</chem>             | 10.1016/j.bmc.2010.02.002    | 3.94                | 0.06       | [ <sup>125</sup> I]TZDM         |
| Cui2010-07    | <chem>BrC1=CC(SC(C2=CC=C(C3=CC=CS3)S2)=N4)=C4C=C1</chem>           | 10.1016/j.bmc.2010.02.002    | 0.57                | 0.08       | [ <sup>125</sup> I]TZDM         |
| Cui2010-08    | <chem>COc1ccc(COc2ccc(OCCF)cc2)cc1</chem>                          | 10.1016/j.bmc.2010.02.002    | 0.6                 | 0.06       | [ <sup>125</sup> I]TZDM         |
| Cui2010-09    | <chem>COc1ccc(COc2ccc(OCCF)cc2)cc1</chem>                          | 10.1016/j.bmc.2010.02.002    | 1.28                | 0.08       | [ <sup>125</sup> I]TZDM         |
| Cui2010-10    | <chem>COc1ccc(COc2ccc(OCCF)cc2)cc1</chem>                          | 10.1016/j.bmc.2010.02.002    | 0.61                | 0.09       | [ <sup>125</sup> I]TZDM         |

| Compound    | SMILES                                                               | DOI                          | K <sub>i</sub> / nM | Error / nM | K <sub>i</sub> against  |
|-------------|----------------------------------------------------------------------|------------------------------|---------------------|------------|-------------------------|
| Cui2010-13  | <chem>IC1=CC(SC(C2=CC=C(C3=CC=CS3)S2)=N4)=C4C=C1</chem>              | 10.1016/j.bmc.2010.02.002    | 0.31                | 0.05       | [ <sup>125</sup> I]TZDM |
| Chun2008-1a | <chem>CCOC(C1=CC(OC(C2=CC=C(N(C)C)C=C2)=N3)=C3C=C1)=O</chem>         | 10.5012/bkcs.2008.29.9.1765  | 0.61                |            | [ <sup>125</sup> I]TZDM |
| Chun2008-1b | <chem>OC(C1=CC(OC(C2=CC=C(N(C)C)C=C2)=N3)=C3C=C1)=O</chem>           | 10.5012/bkcs.2008.29.9.1765  | 1.63                |            | [ <sup>125</sup> I]TZDM |
| Chun2008-1c | <chem>CN(C)C(C=C1)=CC=C1C2=NC(C=C3)=C(O2)C=C3/C=C/C(O)=O</chem>      | 10.5012/bkcs.2008.29.9.1765  | 15.3                |            | [ <sup>125</sup> I]TZDM |
| Chun2008-1d | <chem>CN(C)C(C=C1)=CC=C1C2=NC(C=C3)=C(O2)C=C3/C(C)=C/C(O)=O</chem>   | 10.5012/bkcs.2008.29.9.1765  | 1.18                |            | [ <sup>125</sup> I]TZDM |
| Chun2008-1e | <chem>CN(C)C(C=C1)=CC=C1C2=NC(C=C3)=C(O2)C=C3/C=C(C#N)/C#N</chem>    | 10.5012/bkcs.2008.29.9.1765  | 0.8                 |            | [ <sup>125</sup> I]TZDM |
| Chun2008-1f | <chem>CN(C)C(C=C1)=CC=C1C2=NC(C=C3)=C(O2)C=C3/C(C)=C(C#N)/C#N</chem> | 10.5012/bkcs.2008.29.9.1765  | 0.47                |            | [ <sup>125</sup> I]TZDM |
| Li2016-06   | <chem>FC1=C(CNC2=CC=CC=C2)C=CC(CNC3=CC=CC=C3)=C1</chem>              | 10.1021/acs.jmedchem.6b01063 | 2140                | 430        | [ <sup>125</sup> I]IMPY |
| Li2016-07   | <chem>FC1=C(CNC2=CC=C(C)C=C2)C=CC(CNC3=CC=C(C)C=C3)=C1</chem>        | 10.1021/acs.jmedchem.6b01063 | 71.1                | 3.6        | [ <sup>125</sup> I]IMPY |
| Li2016-08   | <chem>FC1=C(CNC2=CC=C(OC)C=C2)C=CC(CNC3=CC=C(OC)C=C3)=C1</chem>      | 10.1021/acs.jmedchem.6b01063 | 38.5                | 5.2        | [ <sup>125</sup> I]IMPY |
| Li2016-09   | <chem>FC1=C(CNC2=CC=C(Cl)C=C2)C=CC(CNC3=CC=C(Cl)C=C3)=C1</chem>      | 10.1021/acs.jmedchem.6b01063 | 240                 | 45         | [ <sup>125</sup> I]IMPY |
| Li2016-10   | <chem>FC1=C(CNC2=CC=C(OCC)C=C2)C=CC(CNC3=C=C(OCC)C=C3)=C1</chem>     | 10.1021/acs.jmedchem.6b01063 | 14.9                | 5.1        | [ <sup>125</sup> I]IMPY |
| Li2016-11   | <chem>FC1=C(CNC2=CC=C(CC)C=C2)C=CC(CNC3=CC=C(CC)C=C3)=C1</chem>      | 10.1021/acs.jmedchem.6b01063 | 18.5                | 1.2        | [ <sup>125</sup> I]IMPY |
| Li2016-12   | <chem>FC1=C(CNC2=CC=C(SC)C=C2)C=CC(CNC3=CC=C(SC)C=C3)=C1</chem>      | 10.1021/acs.jmedchem.6b01063 | 6.8                 | 0.6        | [ <sup>125</sup> I]IMPY |
| Li2016-13   | <chem>FC1=C(CNC2=CC=CC=C2OC)C=CC(CNC3=C(OC)C=C3)=C1</chem>           | 10.1021/acs.jmedchem.6b01063 | >10000              |            | [ <sup>125</sup> I]IMPY |
| AV-45       |                                                                      | 10.1021/acs.jmedchem.6b01063 | 8.9                 | 1.5        | [ <sup>125</sup> I]IMPY |
| IMPY        | <chem>IC1=CN2C(C=C1)=NC(C3=CC=C(N(C)C)C=C3)=C2</chem>                | 10.1021/acs.jmedchem.6b01063 | 19.8                | 1.6        | [ <sup>125</sup> I]IMPY |
| Li2014-07   | <chem>NC1=CC=C(/C=C/C(/C=C/C2=CC=C(F)C=C2)=O)C=C1</chem>             | 10.1016/j.ejmech.2014.07.070 | 17.1                | 4.3        | [ <sup>125</sup> I]IMPY |
| Li2014-08   | <chem>CNC1=CC=C(/C=C/C(/C=C/C2=CC=C(F)C=C2)=O)C=C1</chem>            | 10.1016/j.ejmech.2014.07.070 | 6.4                 | 3.2        | [ <sup>125</sup> I]IMPY |
| Li2014-09   | <chem>CN(C)C1=CC=C(/C=C/C(/C=C/C2=CC=C(F)C=C2)=O)C=C1</chem>         | 10.1016/j.ejmech.2014.07.070 | 3                   | 0.6        | [ <sup>125</sup> I]IMPY |
| Li2014-10   | <chem>NC1=CC=C(/C=C/C(/C=C/C2=CN=C(F)C=C2)=O)C=C1</chem>             | 10.1016/j.ejmech.2014.07.070 | 135.2               | 58.1       | [ <sup>125</sup> I]IMPY |
| Li2014-11   | <chem>CNC1=CC=C(/C=C/C(/C=C/C2=CN=C(F)C=C2)=O)C=C1</chem>            | 10.1016/j.ejmech.2014.07.070 | 36.5                | 23.9       | [ <sup>125</sup> I]IMPY |
| Li2014-12   | <chem>CN(C)C1=CC=C(/C=C/C(/C=C/C2=CN=C(F)C=C2)=O)C=C1</chem>         | 10.1016/j.ejmech.2014.07.070 | 8.5                 | 2          | [ <sup>125</sup> I]IMPY |
| Li2014-13   | <chem>NC1=CC=C(/C=C/C(/C=C/C2=CN=C(OCC)C=C2)=O)C=C1</chem>           | 10.1016/j.ejmech.2014.07.070 | 65.8                | 17.8       | [ <sup>125</sup> I]IMPY |
| Li2014-14   | <chem>CNC1=CC=C(/C=C/C(/C=C/C2=CN=C(OCC)C=C2)=O)C=C1</chem>          | 10.1016/j.ejmech.2014.07.070 | 14.2                | 5.2        | [ <sup>125</sup> I]IMPY |
| Li2014-15   | <chem>CN(C)C1=CC=C(/C=C/C(/C=C/C2=CN=C(OCC)C=C2)=O)C=C1</chem>       | 10.1016/j.ejmech.2014.07.070 | 7.6                 | 3.9        | [ <sup>125</sup> I]IMPY |

| Compound        | SMILES                                                                                | DOI                          | K <sub>i</sub> / nM | Error / nM | K <sub>i</sub> against  |
|-----------------|---------------------------------------------------------------------------------------|------------------------------|---------------------|------------|-------------------------|
| IMPY            | <chem>IC1=CN2C(C=C1)=NC(C3=CC=C(N(C)C)C=C3)=C2</chem>                                 | 10.1016/j.ejmech.2014.07.070 | 11.5                | 2.5        | [ <sup>125</sup> I]IMPY |
| FA dimer        | <chem>OC(/C=C/C(C=C1OC)=CC=C1OCCOC2=CC=C(/C=C/C(O)=O)C=C2OC)=O</chem>                 | 10.1016/j.bmcl.2007.04.079   | 0.6                 |            | [ <sup>125</sup> I]TZDM |
| Byeon2007-1a    | <chem>OC(/C=C/C(C=C1OC)=CC=C1N(C)CCN(C)C2=C=C(/C=C/C(O)=O)C=C2OC)=O</chem>            | 10.1016/j.bmcl.2007.04.079   | 0.72                |            | [ <sup>125</sup> I]TZDM |
| Byeon2007-1b    | <chem>OC(/C=C/C(C=C1OC)=CC=C1N(CC2)CCN2C3=CC=C(/C=C/C(O)=O)C=C3OC)=O</chem>           | 10.1016/j.bmcl.2007.04.079   | 1.36                |            | [ <sup>125</sup> I]TZDM |
| Byeon2007-2a    | <chem>O=C(O)/C=C/C1=CC(OC)=C(C=C1)OCCOC2=C(OC)C=C(N(C)C)C=C2</chem>                   | 10.1016/j.bmcl.2007.04.079   | 1                   |            | [ <sup>125</sup> I]TZDM |
| Byeon2007-2b    | <chem>O=C(O)/C=C/C1=CC(OC)=C(C=C1)OCCOC2=C(OC)C=C(N(CC(O)=O)CC(O)=O)C=C2</chem>       | 10.1016/j.bmcl.2007.04.079   | 0.57                |            | [ <sup>125</sup> I]TZDM |
| Byeon2007-2c    | <chem>O=C(O)/C=C/C1=CC(OC)=C(C=C1Br)OCCOC2=C(OC)C=C(N(C)C)C=C2</chem>                 | 10.1016/j.bmcl.2007.04.079   | 0.83                |            | [ <sup>125</sup> I]TZDM |
| Byeon2007-2d    | <chem>O=C(O)/C=C/C1=CC(OC)=C(C(Br)=C1)OCCOC2=C(OC)C=C(N(C)C)C=C2</chem>               | 10.1016/j.bmcl.2007.04.079   | 1.32                |            | [ <sup>125</sup> I]TZDM |
| Byeon2007-3a    | <chem>C1(NCCNC2=NC(C=CC=C3)=C3S2)=NC4=C(C=CC=C4)S1</chem>                             | 10.1016/j.bmcl.2007.04.079   | 0.71                |            | [ <sup>125</sup> I]TZDM |
| Byeon2007-3b    | <chem>FC(C=C1)=CC2=C1N=C(S2)NCCNC3=NC(C=CC(F)=C4)=C4S3</chem>                         | 10.1016/j.bmcl.2007.04.079   | 0.75                |            | [ <sup>125</sup> I]TZDM |
| Byeon2007-3c    | <chem>BrC(C=C1)=CC2=C1N=C(S2)NCCNC3=NC(C=C(C)Br)=C4)=C4S3</chem>                      | 10.1016/j.bmcl.2007.04.079   | 1.11                |            | [ <sup>125</sup> I]TZDM |
| Byeon2007-3d    | <chem>ClC(C=C1)=CC2=C1N=C(S2)NCCNC3=NC(C=CC(Cl)=C4)=C4S3</chem>                       | 10.1016/j.bmcl.2007.04.079   | 0.96                |            | [ <sup>125</sup> I]TZDM |
| Byeon2007-3e    | <chem>CS(C1=CC(S2)=C(C=C1)N=C2NCCNC3=NC4=C(C=C(S(C)(=O)=O)C=C4)S3)(=O)=O</chem>       | 10.1016/j.bmcl.2007.04.079   | >10                 |            | [ <sup>125</sup> I]TZDM |
| Byeon2007-3f    | <chem>CC(C=C1)=CC2=C1N=C(S2)NCCNC3=NC(C=CC(C)=C4)=C4S3</chem>                         | 10.1016/j.bmcl.2007.04.079   | 0.81                |            | [ <sup>125</sup> I]TZDM |
| Byeon2007-3g    | <chem>NC(C=C1)=CC2=C1N=C(S2)NCCNC3=NC(C=CC(N)=C4)=C4S3</chem>                         | 10.1016/j.bmcl.2007.04.079   | 0.69                |            | [ <sup>125</sup> I]TZDM |
| Byeon2007-4a    | <chem>C1(N(C)CCN(C)C2=NC(C=CC=C3)=C3S2)=NC4=C(C=CC=C4)S1</chem>                       | 10.1016/j.bmcl.2007.04.079   | 0.53                |            | [ <sup>125</sup> I]TZDM |
| Byeon2007-4b    | <chem>FC(C=C1)=CC2=C1N=C(S2)N(C)CCN(C)C3=NC(C=CC(F)=C4)=C4S3</chem>                   | 10.1016/j.bmcl.2007.04.079   | 1.37                |            | [ <sup>125</sup> I]TZDM |
| Byeon2007-4c    | <chem>BrC(C=C1)=CC2=C1N=C(S2)N(C)CCN(C)C3=NC(C=CC(Br)=C4)=C4S3</chem>                 | 10.1016/j.bmcl.2007.04.079   | 0.55                |            | [ <sup>125</sup> I]TZDM |
| Byeon2007-4d    | <chem>ClC(C=C1)=CC2=C1N=C(S2)N(C)CCN(C)C3=NC(C=CC(Cl)=C4)=C4S3</chem>                 | 10.1016/j.bmcl.2007.04.079   | 0.64                |            | [ <sup>125</sup> I]TZDM |
| Byeon2007-4e    | <chem>CS(C1=CC(S2)=C(C=C1)N=C2N(C)CCN(C)C3=NC4=C(C=C(S(C)(=O)=O)C=C4)S3)(=O)=O</chem> | 10.1016/j.bmcl.2007.04.079   | 0.55                |            | [ <sup>125</sup> I]TZDM |
| Byeon2007-4f    | <chem>CC(C=C1)=CC2=C1N=C(S2)N(C)CCN(C)C3=NC(C=CC(C)=C4)=C4S3</chem>                   | 10.1016/j.bmcl.2007.04.079   | 0.61                |            | [ <sup>125</sup> I]TZDM |
| Byeon2007-4g    | <chem>NC(C=C1)=CC2=C1N=C(S2)N(C)CCN(C)C3=NC(C=CC(N)=C4)=C4S3</chem>                   | 10.1016/j.bmcl.2007.04.079   | 0.69                |            | [ <sup>125</sup> I]TZDM |
| PiB             | <chem>CNc1ccc(-c2nc3ccc(O)cc3s2)cc1</chem>                                            | 10.1016/j.bmcl.2007.04.079   | 0.77                |            | [ <sup>125</sup> I]TZDM |
| FA              | <chem>OC1=C(OC)C=C(/C=C/C(O)=O)C=C1</chem>                                            | 10.1016/j.bmcl.2007.04.079   | 0.77                |            | [ <sup>125</sup> I]TZDM |
| Watanabe2015-07 | <chem>IC1=CC=C(OC(C2=CN=C(N)C=C2)=N3)C3=C1</chem>                                     | 10.1039/c4ra10742j           | 138                 | 18         | [ <sup>125</sup> I]IMPY |
| Watanabe2015-08 | <chem>IC1=CC=C(OC(C2=CN=C(NC)C=C2)=N3)C3=C1</chem>                                    | 10.1039/c4ra10742j           | 26.7                | 2.54       | [ <sup>125</sup> I]IMPY |

| Compound         | SMILES                                                               | DOI                             | K <sub>i</sub> / nM | Error / nM | K <sub>i</sub> against              |
|------------------|----------------------------------------------------------------------|---------------------------------|---------------------|------------|-------------------------------------|
| Watanabe2015-09  | <chem>IC1=CC=C(OC(C2=CN=C(N(C)C)C=C2)=N3)C3=C1</chem>                | 10.1039/c4ra10742j              | 6.9                 | 1.14       | [ <sup>125</sup> I]IMPY             |
| IMPY             | <chem>IC1=CN2C(C=C1)=NC(C3=CC=C(N(C)C)C=C3)=C2</chem>                | 10.1039/c4ra10742j              | 3.05                | 0.46       | [ <sup>125</sup> I]IMPY             |
| Fuchigami2015-13 | <chem>IC1=CC(C(C=C(/C=C/C2=CC=CC=C2)O3)=O)=C3C=C1</chem>             | 10.1016/j.bmcl.2015.05.048      | 198                 | 48         | [ <sup>125</sup> I]Fuchigami2015-20 |
| Fuchigami2015-14 | <chem>IC1=CC(C(C=C(/C=C/C2=CC=C(OC)C=C2)O3)=O)=C3C=C1</chem>         | 10.1016/j.bmcl.2015.05.048      | 21.9                | 5.1        | [ <sup>125</sup> I]Fuchigami2015-20 |
| Fuchigami2015-15 | <chem>IC1=CC(C(C=C(/C=C/C2=CC(OC)=C(OC)C=C2)O3)=O)=C3C=C1</chem>     | 10.1016/j.bmcl.2015.05.048      | 45.5                | 10.7       | [ <sup>125</sup> I]Fuchigami2015-20 |
| Fuchigami2015-16 | <chem>IC1=CC(C(C=C(/C=C/C2=CC=C(O)C=C2)O3)=O)=C3C=C1</chem>          | 10.1016/j.bmcl.2015.05.048      | 121                 | 20.8       | [ <sup>125</sup> I]Fuchigami2015-20 |
| Fuchigami2015-17 | <chem>IC1=CC(C(C=C(/C=C/C2=CC=C(OCCO)C=C2)O3)=O)=C3C=C1</chem>       | 10.1016/j.bmcl.2015.05.048      | 446                 | 100        | [ <sup>125</sup> I]Fuchigami2015-20 |
| Fuchigami2015-18 | <chem>IC1=CC(C(C=C(/C=C/C2=CC=C(OCCOCCO)C=C2)O3)=O)=C3C=C1</chem>    | 10.1016/j.bmcl.2015.05.048      | 415                 | 64.5       | [ <sup>125</sup> I]Fuchigami2015-20 |
| Fuchigami2015-19 | <chem>IC1=CC(C(C=C(/C=C/C2=CC=C(OCCOCCOCCO)C=C2)O3)=O)=C3C=C1</chem> | 10.1016/j.bmcl.2015.05.048      | 553                 | 135        | [ <sup>125</sup> I]Fuchigami2015-20 |
| Fuchigami2015-20 | <chem>IC1=CC(C(C=C(/C=C/C2=CC=C(N(C)C)C=C2)O3)=O)=C3C=C1</chem>      | 10.1016/j.bmcl.2015.05.048      | 21.8                | 3.35       | [ <sup>125</sup> I]Fuchigami2015-20 |
| Lee2008-18a      | <chem>O=C1N(C2=CC=C(N)C=C2)CC3=C1C=CC(OCCOCCF)=C3</chem>             | 10.1016/j.bmcl.2008.05.019      | 0.61                |            | [ <sup>125</sup> I]TZDM             |
| Lee2008-18b      | <chem>O=C1N(C2=CC=C(NC)C=C2)CC3=C1C=CC(OCCOCCF)=C3</chem>            | 10.1016/j.bmcl.2008.05.019      | 0.91                |            | [ <sup>125</sup> I]TZDM             |
| Lee2008-18c      | <chem>O=C1N(C2=CC=C(N(C)C)C=C2)CC3=C1C=CC(OCCOCCF)=C3</chem>         | 10.1016/j.bmcl.2008.05.019      | 0.3                 |            | [ <sup>125</sup> I]TZDM             |
| Lee2008-18d      | <chem>O=C1N(C2=CC=C(N)C=C2)CC3=C1C=CC(OCCOCCF)=C3</chem>             | 10.1016/j.bmcl.2008.05.019      | 0.4                 |            | [ <sup>125</sup> I]TZDM             |
| Lee2008-18e      | <chem>O=C1N(C2=CC=C(NC)C=C2)CC3=C1C=CC(OCCOCCF)=C3</chem>            | 10.1016/j.bmcl.2008.05.019      | 0.51                |            | [ <sup>125</sup> I]TZDM             |
| Lee2008-18f      | <chem>O=C1N(C2=CC=C(N(C)C)C=C2)CC3=C1C=CC(OCCOCCOCCF)=C3</chem>      | 10.1016/j.bmcl.2008.05.019      | 0.71                |            | [ <sup>125</sup> I]TZDM             |
| Lee2008-19a      | <chem>O=C1N(C2=CC=C(N)C=C2)C(=O)C3=C1C=CC(OCCOCCF)=C3</chem>         | 10.1016/j.bmcl.2008.05.019      | 0.59                |            | [ <sup>125</sup> I]TZDM             |
| Lee2008-19b      | <chem>O=C1N(C2=CC=C(NC)C=C2)C(=O)C3=C1C=CC(OCCOCCF)=C3</chem>        | 10.1016/j.bmcl.2008.05.019      | 0.6                 |            | [ <sup>125</sup> I]TZDM             |
| Lee2008-19c      | <chem>O=C1N(C2=CC=C(N(C)C)C=C2)C(=O)C3=C1C=CC(OCCOCCF)=C3</chem>     | 10.1016/j.bmcl.2008.05.019      | 0.69                |            | [ <sup>125</sup> I]TZDM             |
| Lee2008-19d      | <chem>O=C1N(C2=CC=C(N)C=C2)C(=O)C3=C1C=CC(OCCOCCOCCF)=C3</chem>      | 10.1016/j.bmcl.2008.05.019      | 0.74                |            | [ <sup>125</sup> I]TZDM             |
| Lee2008-19e      | <chem>O=C1N(C2=CC=C(NC)C=C2)C(=O)C3=C1C=CC(OCCOCCOCCF)=C3</chem>     | 10.1016/j.bmcl.2008.05.019      | 0.78                |            | [ <sup>125</sup> I]TZDM             |
| Lee2008-19f      | <chem>O=C1N(C2=CC=C(N(C)C)C=C2)C(=O)C3=C1C=CC(OCCOCCOCCF)=C3</chem>  | 10.1016/j.bmcl.2008.05.019      | 0.85                |            | [ <sup>125</sup> I]TZDM             |
| Chang2006-2a     | <chem>COC(C=C1)=CC=C1C2=CC3=CC=CC=C3S2</chem>                        | 10.1016/j.nucmedbio.2006.06.006 | 0.52                | 0.14       | [ <sup>125</sup> I]Chang2006-5      |
| Chang2006-2b     | <chem>OC(C=C1)=CC=C1C2=CC3=CC=CC=C3S2</chem>                         | 10.1016/j.nucmedbio.2006.06.006 | 3.72                | 0.66       | [ <sup>125</sup> I]Chang2006-5      |
| Chang2006-2c     | <chem>FCCOC(C=C1)=CC=C1C2=CC3=CC=CC=C3S2</chem>                      | 10.1016/j.nucmedbio.2006.06.006 | 0.87                | 0.24       | [ <sup>125</sup> I]Chang2006-5      |
| Chang2006-2d     | <chem>FCCCOC(C=C1)=CC=C1C2=CC3=CC=CC=C3S2</chem>                     | 10.1016/j.nucmedbio.2006.06.006 | 0.73                | 0.44       | [ <sup>125</sup> I]Chang2006-5      |

| Compound     | SMILES                                                       | DOI                             | K <sub>i</sub> / nM | Error / nM | K <sub>i</sub> against         |
|--------------|--------------------------------------------------------------|---------------------------------|---------------------|------------|--------------------------------|
| Chang2006-3b | <chem>NC(C=C1)=CC=C1C2=CC3=CC=CC=C3S2</chem>                 | 10.1016/j.nucmedbio.2006.06.006 | 6.5                 | 1.88       | [ <sup>125</sup> I]Chang2006-5 |
| Chang2006-3c | <chem>CNC(C=C1)=CC=C1C2=CC3=CC=CC=C3S2</chem>                | 10.1016/j.nucmedbio.2006.06.006 | 0.72                | 0.16       | [ <sup>125</sup> I]Chang2006-5 |
| Chang2006-3d | <chem>CN(C)C(C=C1)=CC=C1C2=CC3=CC=CC=C3S2</chem>             | 10.1016/j.nucmedbio.2006.06.006 | 0.63                | 0.29       | [ <sup>125</sup> I]Chang2006-5 |
| Chang2006-3e | <chem>FCCNC(C=C1)=CC=C1C2=CC3=CC=CC=C3S2</chem>              | 10.1016/j.nucmedbio.2006.06.006 | 0.98                | 0.01       | [ <sup>125</sup> I]Chang2006-5 |
| Chang2006-3f | <chem>FCCCNC(C=C1)=CC=C1C2=CC3=CC=CC=C3S2</chem>             | 10.1016/j.nucmedbio.2006.06.006 | 0.77                | 0.41       | [ <sup>125</sup> I]Chang2006-5 |
| Chang2006-4  | <chem>CNC(C=C1)=CC=C1C2=NC3=CC=CC=C3S2</chem>                | 10.1016/j.nucmedbio.2006.06.006 | 16.33               | 1.58       | [ <sup>125</sup> I]Chang2006-5 |
| Cui2012-2-28 | <chem>CNC(N=C1)=CC=C1C2=NC3=CC(OCCOCCF)=CC=C3O2</chem>       | 10.1021/jm300973k               | 101.6               | 15.3       | [ <sup>125</sup> I]IMPY        |
| Cui2012-2-29 | <chem>CNC(N=C1)=CC=C1C2=NC3=CC(OCCOCCOCCF)=CC=C3O2</chem>    | 10.1021/jm300973k               | 76.9                | 15.5       | [ <sup>125</sup> I]IMPY        |
| Cui2012-2-30 | <chem>CN(C)C(N=C1)=CC=C1C2=NC3=CC(OCCOCCF)=CC=C3O2</chem>    | 10.1021/jm300973k               | 7.3                 | 0.8        | [ <sup>125</sup> I]IMPY        |
| Cui2012-2-31 | <chem>CN(C)C(N=C1)=CC=C1C2=NC3=CC(OCCOCCOCCF)=CC=C3O2</chem> | 10.1021/jm300973k               | 9.9                 | 0.5        | [ <sup>125</sup> I]IMPY        |
| Cui2012-2-32 | <chem>CNC(N=C1)=CC=C1C2=NC3=CC(OCCF)=CC=C3O2</chem>          | 10.1021/jm300973k               | 8                   | 3.2        | [ <sup>125</sup> I]IMPY        |
| Cui2012-2-33 | <chem>CN(C)C(N=C1)=CC=C1C2=NC3=CC(OCCF)=CC=C3O2</chem>       | 10.1021/jm300973k               | 2.7                 | 0.7        | [ <sup>125</sup> I]IMPY        |
| Cui2012-2-40 | <chem>CNC(N=C1)=CC=C1C2=NC3=CC=C(OCCOCCF)C=C3S2</chem>       | 10.1021/jm300973k               | 29.7                | 7.1        | [ <sup>125</sup> I]IMPY        |
| Cui2012-2-41 | <chem>CNC(N=C1)=CC=C1C2=NC3=CC=C(OCCOCCOCCF)C=C3S2</chem>    | 10.1021/jm300973k               | 9.3                 | 0.1        | [ <sup>125</sup> I]IMPY        |
| Cui2012-2-42 | <chem>CN(C)C(N=C1)=CC=C1C2=NC3=CC=C(OCCOCCF)C=C3S2</chem>    | 10.1021/jm300973k               | 4.6                 | 0.6        | [ <sup>125</sup> I]IMPY        |
| Cui2012-2-43 | <chem>CN(C)C(N=C1)=CC=C1C2=NC3=CC=C(OCCOCCOCCF)C=C3S2</chem> | 10.1021/jm300973k               | 5.8                 | 1.8        | [ <sup>125</sup> I]IMPY        |
| Cui2012-2-44 | <chem>CNC(N=C1)=CC=C1C2=NC3=CC=C(OCCF)C=C3S2</chem>          | 10.1021/jm300973k               | 10.1                | 2.4        | [ <sup>125</sup> I]IMPY        |
| Cui2012-2-45 | <chem>CN(C)C(N=C1)=CC=C1C2=NC3=CC=C(OCCF)C=C3S2</chem>       | 10.1021/jm300973k               | 2.7                 | 0.6        | [ <sup>125</sup> I]IMPY        |



## Non-FBH Database

**Table 4.** Database containing other ligands that have been assayed against A $\beta$ (1-42). The “ $K_d$  / nM” column lists the dissociation constant measured of the compound in a direct binding assay. The “ $K_i$  / nM” column lists the dissociation constant measured of the compound in a competition assay. The “Error / nM” column gives the error in either the  $K_d$  or  $K_i$  measurement reported in the publication. The “ $K_i$  against” column lists the reporting ligand used in the competition assay, if any. The “Two-site model” column identifies whether the reported binding constant was fitted using a two-site model.

| Compound    | SMILES                                                                                   | DOI                    | $K_d$ / nM | $K_i$ / nM | Error / nM | $K_i$ against | Two-site model? |
|-------------|------------------------------------------------------------------------------------------|------------------------|------------|------------|------------|---------------|-----------------|
| BTDSB       | <chem>OC1=CC=C(/C=C/C(C2=NSN=C23)=CC=C3/C=C/C4=CC(C(O)=O)=C(O)C=C4)C=C1C(O)=O</chem>     | 10.1002/chem.201800501 | 93         |            | 5          |               |                 |
| NSB         | <chem>OC1=CC=C(/C=C/C2=CC(C=CC(/C=C/C3=CC(C(O)=O)=C(O)C=C3)=C4)=C4C=C2)C=C1C(O)=O</chem> | 10.1002/chem.201800501 | 264        |            | 13         |               |                 |
| QSB         | <chem>OC1=CC=C(/C=C/C(C2=C3N=CC=N2)=CC=C3/C=C/C4=CC(C(O)=O)=C(O)C=C4)C=C1C(O)=O</chem>   | 10.1002/chem.201800501 | 124        |            | 7          |               |                 |
| ThT         | <chem>OC1=CC=C([N+](C)=C(C2=CC=C(N(C)C)C=C2)S3)C3=C1</chem>                              | 10.1002/chem.201800501 | 665        |            | 66         |               |                 |
| TSB         | <chem>OC(C(C(O)=O)=C1)=CC=C1/C=C/C2=CC=C(/C=C/C3=CC(C(O)=O)=C(O)C=C3)S2</chem>           | 10.1002/chem.201800501 | 13         |            | 1          |               |                 |
| X-34        | <chem>OC1=CC=C(/C=C/C2=CC=C(/C=C/C3=CC(C(O)=O)=C(O)C=C3)C=C2)C=C1C(O)=O</chem>           | 10.1002/chem.201800501 | 299        |            | 21         |               |                 |
| Sutharsan11 | <chem>O=C(OCCOCCOCCOC)/C(C#N)=C/C1=CC(C=C2)=C(C=C1)C=C2N3CCCCC3</chem>                   | 10.1002/cmdc.200900440 | 2500       |            |            |               |                 |
| Sutharsan14 | <chem>CN(C)C1=CC=C(/C=C(C#N)/C(OCC(CO)O)=O)C=C1</chem>                                   | 10.1002/cmdc.200900440 | 3300       |            |            |               |                 |
| Sutharsan19 | <chem>CN(C)C1=CC=C(/C=C/C2=CC=C(/C=C(C#N)/C(OCCOCCOCCOC)=O)C=C2)C=C1</chem>              | 10.1002/cmdc.200900440 | 1400       |            |            |               |                 |
| Sutharsan8a | <chem>CN(C)C1=CC=C(/C=C(C#N)/C(OCCOCCOCCOC)=O)C=C1</chem>                                | 10.1002/cmdc.200900440 | 2600       |            |            |               |                 |
| Sutharsan8b | <chem>CN(C)C1=CC=C(/C=C(C#N)/C(OCCOCCOCCOC)=O)C(OC)=C1</chem>                            | 10.1002/cmdc.200900440 | 5300       |            |            |               |                 |
| Sutharsan8c | <chem>O=C(OCCOCCOCCOC)/C(C#N)=C/C(C=C1)=CC=C1N(CC)CC</chem>                              | 10.1002/cmdc.200900440 | 4800       |            |            |               |                 |

| Compound         | SMILES                                                                       | DOI                        | K <sub>d</sub> / nM | K <sub>i</sub> / nM | Error / nM | K <sub>i</sub> against | Two-site model? |
|------------------|------------------------------------------------------------------------------|----------------------------|---------------------|---------------------|------------|------------------------|-----------------|
| Sutharsan8d      | <chem>O=C(OCCOCCOCCOC)/C(C#N)=C/C(C=C1)=CC=C1N(CCCC)CCCC</chem>              | 10.1002/cmdc.200900440     | 4400                |                     |            |                        |                 |
| Py1SA            | <chem>OC(C=C1)=C(C(O)=O)C=C1/C=C/C2=C3C4=C(C=CC5=C4C(C=C3)=CC=C5)C=C2</chem> | 10.1002/cphc.201800823     | 310                 |                     | 29         |                        |                 |
| Py2SA            | <chem>OC(C=C1)=C(C(O)=O)C=C1/C=C/C2=CC(C=CC3=C4C(C=C5)=CC=C3)=C4C5=C2</chem> | 10.1002/cphc.201800823     | 48                  |                     |            |                        | Site 1          |
| Py2SA            | <chem>OC(C=C1)=C(C(O)=O)C=C1/C=C/C2=CC(C=CC3=C4C(C=C5)=CC=C3)=C4C5=C2</chem> | 10.1002/cphc.201800823     | 360                 |                     |            |                        | Site 2          |
| BF-227           | <chem>[18F]CCOC1=CC=C2C(OC(/C=C/C3=CN=C(N(C)C)S3)=N2)=C1</chem>              | 10.1007/s00259-012-2261-2  | 1.72                |                     | 0.83       |                        | Site 1          |
| BF-227           | <chem>[18F]CCOC1=CC=C2C(OC(/C=C/C3=CN=C(N(C)C)S3)=N2)=C1</chem>              | 10.1007/s00259-012-2261-2  | 56.1                |                     | 25.1       |                        | Site 2          |
| FDDNP            | <chem>C/C(C1=CC(C=C2)=C(C=C1)C=C2N(C)CC[18F])=C(C#N)/C#N</chem>              | 10.1007/s00259-012-2261-2  | 5.52                |                     | 1.97       |                        |                 |
| PIB              | <chem>OC1=CC=C2C(SC(C3=CC=C(N[11CH3])C=C3)=N2)=C1</chem>                     | 10.1007/s00259-012-2261-2  | 0.84                |                     | 0.18       |                        | Site 1          |
| PIB              | <chem>OC1=CC=C2C(SC(C3=CC=C(N[11CH3])C=C3)=N2)=C1</chem>                     | 10.1007/s00259-012-2261-2  | 60.6                |                     | 8.32       |                        | Site 2          |
| THK-523          | <chem>[18F]CCOC1=CC=C(N=C(C2=CC=C(N)C=C2)C=C3)C3=C1</chem>                   | 10.1007/s00259-012-2261-2  | 30.3                |                     | 3.91       |                        |                 |
| [11C]MODAG-001   | <chem>CN(C)C1=CC=C(C2=NNC(C3=CC=NC(Br)=C3)=C2)C=C1</chem>                    | 10.1007/s00259-020-05133-x | 20                  |                     | 10         |                        |                 |
| [125I]Ono2007-12 | <chem>[125I]C1=CC(C(/C(O2)=C/C3=CC=C(N)C=C3)=O)=C2C=C1</chem>                | 10.1016/j.bbrc.2007.06.162 | 7.9                 |                     | 1.3        |                        |                 |
| Ono2007-12       | <chem>IC1=CC(C(/C(O2)=C/C3=CC=C(N)C=C3)=O)=C2C=C1</chem>                     | 10.1016/j.bbrc.2007.06.162 |                     | 2.69                | 0.16       | [125I]Ono2007-12       |                 |
| Ono2007-13       | <chem>IC1=CC(C(/C(O2)=C/C3=CC=C(NC)C=C3)=O)=C2C=C1</chem>                    | 10.1016/j.bbrc.2007.06.162 |                     | 1.24                | 0.11       | [125I]Ono2007-12       |                 |
| Ono2007-14       | <chem>IC1=CC(C(/C(O2)=C/C3=CC=C(N(C)C)C=C3)=O)=C2C=C1</chem>                 | 10.1016/j.bbrc.2007.06.162 |                     | 6.82                | 0.48       | [125I]Ono2007-12       |                 |

| Compound     | SMILES                                                                              | DOI                                        | K <sub>d</sub> / nM | K <sub>i</sub> / nM | Error / nM | K <sub>i</sub> against | Two-site model? |
|--------------|-------------------------------------------------------------------------------------|--------------------------------------------|---------------------|---------------------|------------|------------------------|-----------------|
| BZ-OB        | <chem>F[B-]1(OC(/C=C/C2=CC(C=C(N(C)C)=C3)=C3O2)=C(CC(C)C)=[O+])1)F</chem>           | 10.1016/j.bioac<br>tmat.2021.10.0<br>47    | 21.56               |                     | 9.45       |                        |                 |
| NAP-OB       | <chem>F[B-]1(OC(/C=C/C2=CC(C=C(N(C)C)=C3)=C3C=C2)=CC(CC(C)C)=[O+])1)F</chem>        | 10.1016/j.bioac<br>tmat.2021.10.0<br>47    | 0.62                |                     | 0.33       |                        |                 |
| DBA-SLOH     | <chem>OCC[N+](C=C1)=C2C(C=CC=C2)=C1/C=C/C(C=C3)=CC=C3N(CCCC)CCCC</chem>             | 10.1016/j.biom<br>aterials.2016.03<br>.047 | 3090                |                     |            |                        |                 |
| DMA-SLOH     | <chem>CN(C)C1=CC=C(/C=C/C2=C(C=C=CC=C3)C3=[N+](C(CO)C=C2)C=C1</chem>                | 10.1016/j.biom<br>aterials.2016.03<br>.047 | 7780                |                     |            |                        |                 |
| DPA-SLM      | <chem>C[N+](C=C1)=C2C(C=CC=C2)=C1/C=C/C(C=C3)=CC=C3N(C4=CC=CC=C4)C5=CC=CC=C5</chem> | 10.1016/j.biom<br>aterials.2016.03<br>.047 | 17350               |                     |            |                        |                 |
| CQ           | <chem>CCN(CC)C1=CC(OC(C/C=C/C2=[N+](C)C(C=CC=C3)=C3C=C2)=C4)=O)=C4C=C1</chem>       | 10.1016/j.bios.2<br>017.06.030             | 86                  |                     | 6.3        |                        |                 |
| [125I]DMIC   | <chem>[125I]C1=CC=C(C(/C=C/C2=CC=C(N(C)C)C=C2)=O)C=C1</chem>                        | 10.1016/j.bmc.<br>2007.07.052              | 4.2                 |                     | 1.1        |                        |                 |
| Ono2009b-08a | <chem>O=C(C=C(C1=CC=C(N(C)C)C=C1)O2)C3=C2C=CC(OCCF)=C3</chem>                       | 10.1016/j.bmc.<br>2009.01.025              |                     | 5.3                 | 0.8        | [125I]DMFV             |                 |
| Ono2009b-08b | <chem>O=C(C=C(C1=CC=C(N(C)C)C=C1)O2)C3=C2C=CC(OCCOCCF)=C3</chem>                    | 10.1016/j.bmc.<br>2009.01.025              |                     | 14.4                | 2.5        | [125I]DMFV             |                 |
| Ono2009b-08c | <chem>O=C(C=C(C1=CC=C(N(C)C)C=C1)O2)C3=C2C=CC(OCCOCCOCCF)=C3</chem>                 | 10.1016/j.bmc.<br>2009.01.025              |                     | 19.3                | 4          | [125I]DMFV             |                 |
| Ono2009b-12  | <chem>O=C(C=C(C1=CC=C(N)C=C1)O2)C3=C2C=CC(OCCF)=C3</chem>                           | 10.1016/j.bmc.<br>2009.01.025              |                     | 234.3               | 63.5       | [125I]DMFV             |                 |
| Ono2009b-13  | <chem>O=C(C=C(C1=CC=C(NC)C=C1)O2)C3=C2C=CC(OCF)=C3</chem>                           | 10.1016/j.bmc.<br>2009.01.025              |                     | 99                  | 11.8       | [125I]DMFV             |                 |
| Ono2009b-15b | <chem>O=C(C=C(C1=CC=C(N)C=C1)O2)C3=C2C=CC(OCCOCCF)=C3</chem>                        | 10.1016/j.bmc.<br>2009.01.025              |                     | 321.1               | 74.4       | [125I]DMFV             |                 |
| Ono2009b-15c | <chem>O=C(C=C(C1=CC=C(N)C=C1)O2)C3=C2C=CC(OCCOCCOCCF)=C3</chem>                     | 10.1016/j.bmc.<br>2009.01.025              |                     | 234                 | 60.6       | [125I]DMFV             |                 |
| Ono2009b-17b | <chem>O=C(C=C(C1=CC=C(NC)C=C1)O2)C3=C2C=CC(OC OCCF)=C3</chem>                       | 10.1016/j.bmc.<br>2009.01.025              |                     | 54.5                | 10.3       | [125I]DMFV             |                 |

| Compound                | SMILES                                                                 | DOI                       | K <sub>d</sub> / nM | K <sub>i</sub> / nM | Error / nM | K <sub>i</sub> against  | Two-site model? |
|-------------------------|------------------------------------------------------------------------|---------------------------|---------------------|---------------------|------------|-------------------------|-----------------|
| Ono2009b-17c            | <chem>O=C(C=C(C1=CC=C(NC)C=C1)O2)C3=C2C=CC(OC COCCOCCF)=C3</chem>      | 10.1016/j.bmc.2009.01.025 |                     | 45.1                | 5.8        | [ <sup>125</sup> I]DMFV |                 |
| Ono2009b-21             | <chem>FC1=CC(C(C=C(C2=CC=C(N)C=C2)O3)=O)=C3C=C1</chem>                 | 10.1016/j.bmc.2009.01.025 |                     | 260.5               | 43.3       | [ <sup>125</sup> I]DMFV |                 |
| Ono2009b-22             | <chem>FC1=CC(C(C=C(C2=CC=C(NC)C=C2)O3)=O)=C3C=C1</chem>                | 10.1016/j.bmc.2009.01.025 |                     | 110                 | 47.4       | [ <sup>125</sup> I]DMFV |                 |
| Ono2009b-23             | <chem>FC1=CC(C(C=C(C2=CC=C(N(C)C)C=C2)O3)=O)=C3C=C1</chem>             | 10.1016/j.bmc.2009.01.025 |                     | 73.9                | 5.3        | [ <sup>125</sup> I]DMFV |                 |
| PiB                     | <chem>OC1=CC=C(N=C(C2=CC=C(NC)C=C2)S3)C3=C1</chem>                     | 10.1016/j.bmc.2009.08.032 |                     |                     |            | ThT                     |                 |
| PP-BTA-1                | <chem>CN(C)C1=CC=C2C(SC(/C=C(C#N)/C#N)=N2)=C1</chem>                   | 10.1016/j.bmc.2009.08.032 |                     |                     |            | ThT                     |                 |
| PP-BTA-2                | <chem>CN(C)C1=CC=C2C(SC(/C=C/C3=CC=C(/C=C(C#N)/C#N)C=C3)=N2)=C1</chem> | 10.1016/j.bmc.2009.08.032 |                     |                     |            | ThT                     |                 |
| [ <sup>125</sup> I]TZDM | <chem>[<sup>125</sup>I]C1=CC(SC(C2=CC=C(N(C)C)C=C2)=N3)=C3C=C1</chem>  | 10.1016/j.bmc.2011.03.029 | 0.45                |                     | 0.032      |                         |                 |
| Morais2011 a-01E        | <chem>CN(CCF)C(C=C1)=CC=C1/C=C/C2=NC3=C(S2)C=C3</chem>                 | 10.1016/j.bmc.2011.09.065 | 10670               |                     | 1550       |                         |                 |
| Morais2011 a-01Z        | <chem>CN(CCF)C(C=C1)=CC=C1/C=C/C2=NC3=C(S2)C=C3</chem>                 | 10.1016/j.bmc.2011.09.065 | 23960               |                     | 3570       |                         |                 |
| Morais2011 a-02E        | <chem>CN(CCF)C(C=C1)=CC=C1/C=C/C2=NC3=C(O2)C=CC=C3</chem>              | 10.1016/j.bmc.2011.09.065 | 4480                |                     | 380        |                         |                 |
| Morais2011 a-02Z        | <chem>CN(CCF)C(C=C1)=CC=C1/C=C/C2=NC3=C(O2)C=CC=C3</chem>              | 10.1016/j.bmc.2011.09.065 | 5990                |                     | 560        |                         |                 |
| Morais2011 a-03E        | <chem>CN(CCF)C(C=C1)=CC=C1/C=C/C2=NC3=C(N2)C=CC=C3</chem>              | 10.1016/j.bmc.2011.09.065 | 3630                |                     | 180        |                         |                 |
| Morais2011 a-04E        | <chem>CN(CCF)C(C=C1)=CC=C1/C=C/C2=NC3=C(N2C)C=CC=C3</chem>             | 10.1016/j.bmc.2011.09.065 | 5190                |                     | 570        |                         |                 |
| Morais2011 a-04Z        | <chem>CN(CCF)C(C=C1)=CC=C1/C=C/C2=NC3=C(N2C)C=CC=C3</chem>             | 10.1016/j.bmc.2011.09.065 | 3520                |                     | 170        |                         |                 |
| ThT                     | <chem>OC1=CC=C([N+](C)=C(C2=CC=C(N(C)C)C=C2)S3)C3=C1</chem>            | 10.1016/j.bmc.2011.09.065 | 2560                |                     | 290        |                         |                 |

| Compound    | SMILES                                                                                       | DOI                       | K <sub>d</sub> / nM | K <sub>i</sub> / nM | Error / nM | K <sub>i</sub> against  | Two-site model? |
|-------------|----------------------------------------------------------------------------------------------|---------------------------|---------------------|---------------------|------------|-------------------------|-----------------|
| SBIM-1      | <chem>IC1=CC(NC(/C=C/C2=CC=C(N)C=C2)=N3)=C3C=C1</chem>                                       | 10.1016/j.bmc.2013.02.054 | 900                 |                     | 270        |                         |                 |
| SBIM-2      | <chem>IC1=CC(NC(/C=C/C2=CC=C(N)C=C2)=N3)=C3C=C1</chem>                                       | 10.1016/j.bmc.2013.02.054 | 420                 |                     | 50         |                         |                 |
| SBIM-3      | <chem>IC1=CC(NC(/C=C/C2=CC=C(N)C)C=C2)=N3)=C3C=C1</chem>                                     | 10.1016/j.bmc.2013.02.054 | 820                 |                     | 10         |                         |                 |
| BI-1        | <chem>IC(C=C1)=CC=C1/C=C/C=C/C2=NC3=CC=CC=C3N2CC4=CC=CC=C4</chem>                            | 10.1016/j.bmc.2017.10.010 | 179                 |                     | 59.1       |                         |                 |
| BI-2        | <chem>IC(C=C1)=CC=C1/C=C/C=C/C2=NC3=CC=CC=C3N2C</chem>                                       | 10.1016/j.bmc.2017.10.010 | 727                 |                     | 227        |                         |                 |
| BI-3        | <chem>IC(C=C1)=CC=C1/C=C/C=C/C2=NC3=CC=CC=C3N2CC4=CC=C(OC)C=C4</chem>                        | 10.1016/j.bmc.2017.10.010 | 271                 |                     | 67.3       |                         |                 |
| [18F]DMFC   | <chem>FC1=CC=C(C(/C=C/C2=C(C=C(N)C)C=C2)=O)C=C1</chem>                                       | 10.1016/j.bmc.2018.05.001 | 4.47                |                     |            |                         |                 |
| [18F]FMC    | <chem>FC1=CC=C(C(/C=C/C2=C(C=C(N)C)C=C2)=O)C=C1</chem>                                       | 10.1016/j.bmc.2018.05.001 | 6.5                 |                     |            |                         |                 |
| Lv2018-30   | <chem>C[n+]1c2c(c(N)c3cccc31)C(=O)/C(=C/c1cccc3ccc13)CC2.[I-]</chem>                         | 10.1016/j.bmc.2018.08.007 | 16000               |                     |            |                         |                 |
| Resveratrol | <chem>Oc1ccc(/C=C/c2cc(O)cc(O)c2)cc1</chem>                                                  | 10.1016/j.bmc.2018.08.007 |                     | 38500               |            |                         |                 |
| Resveratrol | <chem>Oc1ccc(/C=C/c2cc(O)cc(O)c2)cc1</chem>                                                  | 10.1016/j.bmc.2018.08.007 | 38500               |                     |            |                         |                 |
| CG          | <chem>OC(C=C1)=C(C(O)=O)C=C1/N=N/C2=CC=C(C3=C(C(/N=N/C4=CC(C(O)=O)=C(O)C=C4)C=C3)C=C2</chem> | 10.1016/j.bmc.2011.08.003 |                     | 0.43                | 0.068      | [ <sup>125</sup> I]IMSB |                 |
| curcumin    | <chem>OC1=C(OC)C=C(/C=C/C(/C=C(O)/C=C/C2=CC(OC)=C(O)C=C2)=O)C=C1</chem>                      | 10.1016/j.bmc.2011.08.003 |                     | 3.57                | 0.025      | [ <sup>125</sup> I]IMSB |                 |
| Lee2011-01  | <chem>O=C(/C=C(O)/C=C/C1=C(C=C(OCCF)C(OC)=C1)/C=C/C(C=C2OC)=CC=C2O</chem>                    | 10.1016/j.bmc.2011.08.003 |                     | 2.12                | 0.097      | [ <sup>125</sup> I]IMSB |                 |
| Lee2011-02  | <chem>O=C(/C=C(O)/C=C/C1=C(C=C(OCCF)C(OC)=C1)/C=C/C(C=C2OC)=CC=C2O</chem>                    | 10.1016/j.bmc.2011.08.003 |                     | 2.69                | 0.033      | [ <sup>125</sup> I]IMSB |                 |

| Compound                             | SMILES                                                                         | DOI                         | K <sub>d</sub> / nM | K <sub>i</sub> / nM | Error / nM | K <sub>i</sub> against  | Two-site model? |
|--------------------------------------|--------------------------------------------------------------------------------|-----------------------------|---------------------|---------------------|------------|-------------------------|-----------------|
| Lee2011-03                           | <chem>OC1=CC=C(/C=C/C(/C=C(O)/C=C/C2=CC=C(OCCOCCF)C(OC)=C2)=O)C=C1OC</chem>    | 10.1016/j.bmc.2011.08.003   |                     | 4.65                | 0.267      | [ <sup>125</sup> I]IMSB |                 |
| Lee2011-04                           | <chem>OC1=CC=C(/C=C/C(/C=C(O)/C=C/C2=CC=C(OCCOCCOCCF)C(OC)=C2)=O)C=C1OC</chem> | 10.1016/j.bmc.2011.08.003   |                     | 4.44                | 0.313      | [ <sup>125</sup> I]IMSB |                 |
| Lee2011-05                           | <chem>COC1=CC=C(/C=C/C(/C=C(O)/C=C/C2=CC=C(OCCOCCF)C(OC)=C2)=O)C=C1OC</chem>   | 10.1016/j.bmc.2011.08.003   |                     | 3.01                | 0.087      | [ <sup>125</sup> I]IMSB |                 |
| Watanabe2012-05                      | <chem>IC1=CC(/C(C(N2)=O)=C\C3=CC=C(NC)C=C3)=C2C=C1</chem>                      | 10.1016/j.bmc.2012.06.086   |                     | 5057                | 158        | ThS                     |                 |
| Watanabe2012-06                      | <chem>IC1=CC(/C(C(N2)=O)=C\C3=CC=C(N(C)C)C=C3)=C2C=C1</chem>                   | 10.1016/j.bmc.2012.06.086   |                     | 4672                | 748        | ThS                     |                 |
| Watanabe2012-13                      | <chem>IC1=CC(C(/C(N2)=C/C3=CC=C(NC)C=C3)=O)=C2C=C1</chem>                      | 10.1016/j.bmc.2012.06.086   |                     | 116                 | 19         | ThS                     |                 |
| Watanabe2012-14                      | <chem>IC1=CC(C(/C(N2)=C/C3=CC=C(N(C)C)C=C3)=O)=C2C=C1</chem>                   | 10.1016/j.bmc.2012.06.086   |                     | 31                  | 6          | ThS                     |                 |
| PT-1                                 | <chem>CC(OC(/C=C/C1=CC=C(N(C)S1)=C\2)=CC2=C(C#N)/C#N</chem>                    | 10.1016/j.bmc.2015.08.081   | 54.3                |                     |            |                         |                 |
| [ <sup>125</sup> I]Fuchigami2013a-05 | <chem>[125I]C1=CC=C(C(NC(C(C)C)C)=C(C=C(O)C=C2)C2=N3)C3=C1</chem>              | 10.1016/j.ejmec.2012.12.020 | 48.4                |                     | 18.3       |                         |                 |
| 2PmNO-2                              | <chem>CN(C)C1=CC=C(/C=C/C=C/C(O2)=NC(N=CC=C3)=N+)3[B-]2(F)F)C=C1</chem>        | 10.1016/j.ejmec.2021.113968 | 164.97              |                     | 13.47      |                         |                 |
| 4PmNO-2                              | <chem>CN(C)C1=CC=C(/C=C/C=C/C(O2)=NC(C=CN=C3)=N+)3[B-]2(F)F)C=C1</chem>        | 10.1016/j.ejmec.2021.113968 | 23.64               |                     | 1.08       |                         |                 |
| PdzNO-2                              | <chem>CN(C)C1=CC=C(/C=C/C=C/C(O2)=NC(C=CC=N3)=N+)3[B-]2(F)F)C=C1</chem>        | 10.1016/j.ejmec.2021.113968 | 20.45               |                     | 1.49       |                         |                 |
| PrzNO-2                              | <chem>CN(C)C1=CC=C(/C=C/C=C/C(O2)=NC(C=NC=C3)=N+)3[B-]2(F)F)C=C1</chem>        | 10.1016/j.ejmec.2021.113968 | >1000               |                     |            |                         |                 |
| PyNO-2                               | <chem>CN(C)C1=CC=C(/C=C/C(O2)=NC(C=CC=C3)=N+)3[B-]2(F)F)C=C1</chem>            | 10.1016/j.ejmec.2021.113968 | 31.46               |                     | 5.33       |                         |                 |
| Yue2022-10a                          | <chem>CN(C)C1=CN=C(C2=CC=C(C=O)C=N2)C=N1</chem>                                | 10.1016/j.ejmec.2022.114715 | nb                  |                     |            |                         |                 |

| Compound    | SMILES                                                   | DOI                           | K <sub>d</sub> / nM | K <sub>i</sub> / nM | Error / nM | K <sub>i</sub> against | Two-site model? |
|-------------|----------------------------------------------------------|-------------------------------|---------------------|---------------------|------------|------------------------|-----------------|
| Yue2022-10b | <chem>CN(C)C1=CN=C(C2=CC=C(/C=C/C=O)C=N2)C=N1</chem>     | 10.1016/j.ejmec h.2022.114715 | 36.2                |                     | 30.4       |                        |                 |
| Yue2022-1b  | <chem>CN(C)C1=CC=C(C2=CC=C(/C=C/C=O)C=C2)C=C1</chem>     | 10.1016/j.ejmec h.2022.114715 | 4                   |                     | 0.4        |                        |                 |
| Yue2022-1c  | <chem>CN(C)C1=CC=C(C2=CC=C(/C=C/C=C/C=O)C=C2)C=C1</chem> | 10.1016/j.ejmec h.2022.114715 | 2.5                 |                     | 0.2        |                        |                 |
| Yue2022-2a  | <chem>CN(C)C1=NC=C(C2=CC=C(C=O)C=C2)C=C1</chem>          | 10.1016/j.ejmec h.2022.114715 | nb                  |                     |            |                        |                 |
| Yue2022-2b  | <chem>CN(C)C1=NC=C(C2=CC=C(/C=C/C=O)C=C2)C=C1</chem>     | 10.1016/j.ejmec h.2022.114715 | 26.5                |                     | 4.4        |                        |                 |
| Yue2022-2c  | <chem>CN(C)C1=NC=C(C2=CC=C(/C=C/C=C/C=O)C=C2)C=C1</chem> | 10.1016/j.ejmec h.2022.114715 | nb                  |                     |            |                        |                 |
| Yue2022-3a  | <chem>CN(C)C1=CN=C(C2=CC=C(C=O)C=C2)C=C1</chem>          | 10.1016/j.ejmec h.2022.114715 | nb                  |                     |            |                        |                 |
| Yue2022-3b  | <chem>CN(C)C1=CN=C(C2=CC=C(/C=C/C=O)C=C2)C=C1</chem>     | 10.1016/j.ejmec h.2022.114715 | 37.3                |                     | 20.6       |                        |                 |
| Yue2022-4a  | <chem>CN(C)C1=CC=C(C2=NC=C(C=O)C=C2)C=C1</chem>          | 10.1016/j.ejmec h.2022.114715 | nb                  |                     |            |                        |                 |
| Yue2022-4b  | <chem>CN(C)C1=CC=C(C2=NC=C(/C=C/C=O)C=C2)C=C1</chem>     | 10.1016/j.ejmec h.2022.114715 | 8.5                 |                     | 2.5        |                        |                 |
| Yue2022-5a  | <chem>CN(C)C1=NC=C(C2=CC=C(C=O)C=C2)C=N1</chem>          | 10.1016/j.ejmec h.2022.114715 | nb                  |                     |            |                        |                 |
| Yue2022-5b  | <chem>CN(C)C1=NC=C(C2=CC=C(/C=C/C=O)C=C2)C=N1</chem>     | 10.1016/j.ejmec h.2022.114715 | 188.6               |                     | 75.8       |                        |                 |
| Yue2022-6a  | <chem>CN(C)C1=NC=C(C2=CC=C(C=O)C=C2)N=C1</chem>          | 10.1016/j.ejmec h.2022.114715 | nb                  |                     |            |                        |                 |
| Yue2022-6b  | <chem>CN(C)C1=NC=C(C2=CC=C(/C=C/C=O)C=C2)N=C1</chem>     | 10.1016/j.ejmec h.2022.114715 | 337.1               |                     | 82.7       |                        |                 |
| Yue2022-7a  | <chem>CN(C)C1=CC=C(C2=CC=C(C=O)C=N2)C=N1</chem>          | 10.1016/j.ejmec h.2022.114715 | nb                  |                     |            |                        |                 |
| Yue2022-7b  | <chem>CN(C)C1=CC=C(C2=CC=C(/C=C/C=O)C=N2)C=N1</chem>     | 10.1016/j.ejmec h.2022.114715 | 14.2                |                     | 1.9        |                        |                 |
| Yue2022-8a  | <chem>CN(C)C1=CN=C(C2=CC=C(C=O)C=N2)C=C1</chem>          | 10.1016/j.ejmec h.2022.114715 | nb                  |                     |            |                        |                 |
| Yue2022-8b  | <chem>CN(C)C1=CN=C(C2=CC=C(/C=C/C=O)C=N2)C=C1</chem>     | 10.1016/j.ejmec h.2022.114715 | 43.1                |                     | 5.9        |                        |                 |
| Yue2022-9a  | <chem>CN(C)C1=NC=C(C2=CC=C(C=O)C=N2)C=N1</chem>          | 10.1016/j.ejmec h.2022.114715 | nb                  |                     |            |                        |                 |
| Yue2022-9b  | <chem>CN(C)C1=NC=C(C2=CC=C(/C=C/C=O)C=N2)C=N1</chem>     | 10.1016/j.ejmec h.2022.114715 | 153                 |                     | 13.2       |                        |                 |

| Compound               | SMILES                                                                                                                                             | DOI                           | K <sub>d</sub> / nM | K <sub>i</sub> / nM | Error / nM | K <sub>i</sub> against | Two-site model? |
|------------------------|----------------------------------------------------------------------------------------------------------------------------------------------------|-------------------------------|---------------------|---------------------|------------|------------------------|-----------------|
| BF-227                 | [18F]CCOC1=CC=C2C(OC(/C=C/C3=CN=C(N(C)C)S3)=N2)=C1                                                                                                 | 10.1016/j.ejphar.2009.06.042  | 1.31                |                     |            |                        | Site 1          |
| BF-227                 | [18F]CCOC1=CC=C2C(OC(/C=C/C3=CN=C(N(C)C)S3)=N2)=C1                                                                                                 | 10.1016/j.ejphar.2009.06.042  | 80                  |                     |            |                        | Site 2          |
| Cous-1                 | O=C1OC2=CC(N(C)C)=CC=C2C=C1/C=C/C(C3=C=C(C4=CC=C(N(C)C)C=C4)S3)=O                                                                                  | 10.1016/j.jlumini.2022.119661 | 24600               |                     |            |                        |                 |
| Cous-4                 | O=C1OC2=CC(N(CC)CC)=CC=C2C=C1/C=C/C(C3=CC=C(C4=CC=C(N(CC)C)C=C4)S3)=O                                                                              | 10.1016/j.jlumini.2022.119661 | 59310               |                     |            |                        |                 |
| ThR                    | O=C1/C(C=C(S(=O)([O-]))=O)C2=C1C=CC=C2)=N\N([H])C(C=C3)=CC=C3C4=NC5=CC=C(C)C(S(=O)([O-]))=O=C5S4                                                   | 10.1016/j.nbd.2007.07.018     | 2500                |                     | 400        |                        |                 |
| ThR                    | O=C1/C(C=C(S(=O)([O-]))=O)C2=C1C=CC=C2)=N\N([H])C(C=C3)=CC=C3C4=NC5=CC=C(C)C(S(=O)([O-]))=O=C5S4                                                   | 10.1016/j.nbd.2007.07.018     |                     | >2000               |            | ThS                    |                 |
| Honson1b               | CC1=CC=C(N=C(NC(C2CCN(S(C3=CC=CC4=NSN=C43)(=O)=O)CC2)=O)S5)C5=C1                                                                                   | 10.1016/j.nbd.2007.07.018     |                     | >2000               |            | ThS                    |                 |
| Honson1c               | CC1=CC=C(N=C(NC(C2CCN(S(=O)(C3=CC=CC4=NSN=C43)=O)CCC2)=O)S5)C5=C1                                                                                  | 10.1016/j.nbd.2007.07.018     |                     | >2000               |            | ThS                    |                 |
| Honson1d               | COC1=CC=C(N=C(/N=N/C2=CC=C(N(C)C)C=C2)S3)C3=C1                                                                                                     | 10.1016/j.nbd.2007.07.018     |                     | 13                  | 2          | ThS                    |                 |
| Honson2a               | OC1=CC=C2C(NC3=C2C=CC=C3)=C1/N=N\C4=C=C(C(C(N)=N)C=C4                                                                                              | 10.1016/j.nbd.2007.07.018     |                     | 200                 | 110        | ThS                    |                 |
| Honson2b (Evan's blue) | CC1=CC(C2=CC=C(C(C)=C2)/N=N/C3=CC=C(C4=C3O)C(S(=O)([O-]))=O)=CC(S(=O)([O-]))=O=C4N)=CC=C1/N=N/C5=CC=C(C6=C5O)C(S(=O)([O-]))=O)C(S(=O)([O-]))=O=C6N | 10.1016/j.nbd.2007.07.018     |                     | 180                 | 59         | ThS                    |                 |
| Honson3a               | CN(CC1)CCN1C2=NC(C=CC=C3)=C3N=C2C(C(OC CCCC)=O)C#N                                                                                                 | 10.1016/j.nbd.2007.07.018     |                     | 150                 | 59         | ThS                    |                 |



| Compound           | SMILES                                                                                                             | DOI                             | K <sub>d</sub> / nM | K <sub>i</sub> / nM | Error / nM | K <sub>i</sub> against | Two-site model? |
|--------------------|--------------------------------------------------------------------------------------------------------------------|---------------------------------|---------------------|---------------------|------------|------------------------|-----------------|
| Honson3b           | <chem>COC(C=CC=C1)=C1N2CCN(C3=NC(C=CC=C4)=C4N=C3C(C(OC=C)=O)C#N)CC2</chem>                                         | 10.1016/j.nbd.2007.07.018       |                     | 190                 | 39         | ThS                    |                 |
| Honson3c           | <chem>N#CC(C(NCCCC1=CC=CC=C1)=O)C2=NC3=C(C=CC=C3)N=C2N4CCCCC4</chem>                                               | 10.1016/j.nbd.2007.07.018       |                     | >2000               |            | ThS                    |                 |
| Honson3d           | <chem>N#CC(C(OC1CCCCC1)=O)C2=NC3=C(C=CC=C3)N=C2N4CCN(CC)CC4</chem>                                                 | 10.1016/j.nbd.2007.07.018       |                     | 720                 | 290        | ThS                    |                 |
| Honson4a           | <chem>NC(C=C1)=CC=C1/C(C2=CC=C(N)C=C2)=C3C=CC(C=C/3)=N</chem>                                                      | 10.1016/j.nbd.2007.07.018       |                     | 110                 | 23         | ThS                    |                 |
| Honson4b           | <chem>CN(C)C(C=C1)=CC=C1/C(C2=CC=C(N(C)C)C=C2)=C3C=C/C(C=C\3)=[N+](C)/C</chem>                                     | 10.1016/j.nbd.2007.07.018       |                     | 29                  | 4          | ThS                    |                 |
| Honson4c           | <chem>CN(C)C(C=C1)=CC=C1/C(C2=C(O)C(S(=O)([O-])=O)=CC3=C2C=CC(S(=O)([O-])=O)=C3)=C4C=C/C(C=C\4)=[N+](C)/C</chem>   | 10.1016/j.nbd.2007.07.018       |                     | >2000               |            | ThS                    |                 |
| Honson5a           | <chem>OC1=C(C[C@@])(C(C)=O)(O)C[C@@H]2O[C@H]3C[C@H](N)[C@@H](O)[C@H](C)O3)C2=C(O)C(C4=C5C=CC=C4OC)=O)C1C5=O</chem> | 10.1016/j.nbd.2007.07.018       |                     | 110                 | 24         | ThS                    |                 |
| Honson5b           | <chem>OC1=C(C[C@])(C(CO)=O)(O)C[C@H]2O[C@H]3C[C@@H](N)[C@H](O)[C@@H](C)O3)C2=C(O)C(C4=C5C=CC=C4OC)=O)C1C5=O</chem> | 10.1016/j.nbd.2007.07.018       |                     | 320                 | 160        | ThS                    |                 |
| Honson6a           | <chem>O=C1/C(C2=CC=CC=C2N1)=C/C3=CC=C(N(C)C)C=C3</chem>                                                            | 10.1016/j.nbd.2007.07.018       |                     | 140                 | 23         | ThS                    |                 |
| Honson6b           | <chem>O=C1/C(C2=CC=CC=C2N1)=C/C3=C(OC)C=C(OC)C=C3OC</chem>                                                         | 10.1016/j.nbd.2007.07.018       |                     | >2000               |            | ThS                    |                 |
| [125I]Chang 2006-5 | <chem>CNC(C([125I])=C1)=CC=C1C2=NC3=CC=CC=C3S2</chem>                                                              | 10.1016/j.nucmedbio.2006.06.006 | 0.44                |                     | 0.25       |                        |                 |
| T2                 | <chem>CN(C)C1=CC(OC)=C(/C=C/C=C/C2=NC(C=CC=C3)=C3N=C2)C(OC)=C1</chem>                                              | 10.1016/j.snb.2002.13.3406      | 349.9               |                     |            |                        |                 |
| QNO-AD-1           | <chem>CCCN(C1=CC=CC=C1N=C2/C=C/C3=CC=C(C4=C(C=C(N(C)C)C=C4)S3)C2=O</chem>                                          | 10.1021/acs.analchem.2c01046    | 16.88               |                     | 1.726      |                        |                 |

| Compound | SMILES                                                                    | DOI                          | K <sub>d</sub> / nM | K <sub>i</sub> / nM | Error / nM | K <sub>i</sub> against | Two-site model? |
|----------|---------------------------------------------------------------------------|------------------------------|---------------------|---------------------|------------|------------------------|-----------------|
| QNO-AD-2 | <chem>CCCN(C1=CC=CC=C1N=C2/C=C/C3=CC=C(C4=C(C=C(N(C)C)C=C4)O3)C2=O</chem> | 10.1021/acs.analchem.2c01046 | 16.82               |                     | 1.61       |                        |                 |
| QNO-AD-3 | <chem>CN(C1=CC=CC=C1N=C2/C=C/C3=CC=C(C4=CC=C(N(C)C)C=C4)S3)C2=O</chem>    | 10.1021/acs.analchem.2c01046 | 23.84               |                     | 1.703      |                        |                 |
| QNO-AD-4 | <chem>CN(C1=CC=CC=C1N=C2/C=C/C3=CC=C(C4=CC=C(N(C)C)C=C4)O3)C2=O</chem>    | 10.1021/acs.analchem.2c01046 | 20.3                |                     | 2.346      |                        |                 |
| FPQLN    | <chem>CN(C)C1=CC=C2C(C=CC(/C=C(C#N)/C3=CC=C(OC(C)C=C3)=N2)=C1</chem>      | 10.1021/acs.analchem.2c02532 |                     | 36                  | 6          | ThT                    |                 |
| FPQXN    | <chem>CN(C)C1=CC=C2C(N=CC(/C=C(C#N)/C3=CC=C(OC(C)C=C3)=N2)=C1</chem>      | 10.1021/acs.analchem.2c02532 |                     | 2                   | 0.3        | ThT                    |                 |
| MPHN     | <chem>CN(C)C1=CC=C(/C=C(C#N)/C2=NC(C=CC=C3)=C3N2)C=C1</chem>              | 10.1021/acs.analchem.2c02532 |                     | 46                  | 18         | ThT                    |                 |
| MQXN     | <chem>CN(C)C1=CC=C2C(N=CC(/C=C(C#N)/C3=NC(C=CC=C4)=C4N3)=N2)=C1</chem>    | 10.1021/acs.analchem.2c02532 |                     | 5                   | 0.4        | ThT                    |                 |
| NPNAN    | <chem>CN(C)C1=CC=C2C(C=CC(/C=C(C#N)/C3=CC=C([N+](=O)C=C3)=C2)=C1</chem>   | 10.1021/acs.analchem.2c02532 |                     | 0.4                 | 0.02       | ThT                    |                 |
| NPQLN    | <chem>CN(C)C1=CC=C2C(C=CC(/C=C(C#N)/C3=CC=C([N+](=O)C=C3)=N2)=C1</chem>   | 10.1021/acs.analchem.2c02532 |                     | 1                   | 0.06       | ThT                    |                 |
| NPQXN    | <chem>CN(C)C1=CC=C2C(N=CC(/C=C(C#N)/C3=CC=C([N+](=O)C=C3)=N2)=C1</chem>   | 10.1021/acs.analchem.2c02532 |                     | 2                   | 0.1        | ThT                    |                 |
| OPQLN    | <chem>CN(C)C1=CC=C2C(C=CC(/C=C(C#N)/C3=CC=C(O)C=C3)=N2)=C1</chem>         | 10.1021/acs.analchem.2c02532 |                     | 79                  | 6          | ThT                    |                 |
| OPQXN    | <chem>CN(C)C1=CC=C2C(N=CC(/C=C(C#N)/C3=CC=C(O)C=C3)=N2)=C1</chem>         | 10.1021/acs.analchem.2c02532 |                     | 15                  | 1          | ThT                    |                 |
| ThT      | <chem>CN(C)C(C=C1)=CC=C1C2=[N+](C)C3=CC=C(O)C=C3S2</chem>                 | 10.1021/acs.analchem.2c02532 | 117                 |                     | 19         |                        |                 |
| TNAN     | <chem>CN(C)C1=CC=C2C(C=CC(/C=C(C#N)/C3=NC(C=CC=C4)=C4S3)=C2)=C1</chem>    | 10.1021/acs.analchem.2c02532 |                     | 0.8                 | 0.04       | ThT                    |                 |
| TPHN-1   | <chem>CN(C)C1=CC=C(/C=C(C#N)/C2=NC(C=CC=C3)=C3S2)C=C1</chem>              | 10.1021/acs.analchem.2c02532 |                     | 4                   | 0.2        | ThT                    |                 |

| Compound  | SMILES                                                                     | DOI                        | K <sub>d</sub> / nM | K <sub>i</sub> / nM | Error / nM | K <sub>i</sub> against | Two-site model? |
|-----------|----------------------------------------------------------------------------|----------------------------|---------------------|---------------------|------------|------------------------|-----------------|
| TPHN-2    | <chem>CN(C)C(C=C1)=CC=C1/C=C/C=C(C#N)/C2=NC(C=CC=C3)=C3S2</chem>           | 10.1021/acs.alchem.2c02532 |                     | 1                   | 0.08       | ThT                    |                 |
| TPYN-1    | <chem>CN(C)C1=CC=C(/C=C(C#N)/C2=NC(C=CC=C3)C=N1</chem>                     | 10.1021/acs.alchem.2c02532 |                     | 26                  | 14         | ThT                    |                 |
| TPYN-2    | <chem>CN(C)C(N=C1)=CC=C1/C=C/C=C(C#N)/C2=NC(C=CC=C3)=C3S2</chem>           | 10.1021/acs.alchem.2c02532 |                     | 2                   | 0.3        | ThT                    |                 |
| TQL2N     | <chem>CN(C)C1=CC=C2C(C=CC(/C=C(C#N)/C3=NC(C=CC=C4)=C4S3)=C2)=N1</chem>     | 10.1021/acs.alchem.2c02532 |                     | 11                  | 1          | ThT                    |                 |
| TQL6N     | <chem>CN(C)C1=CC=C2C(C=CC(/C=C(C#N)/C3=NC(C=CC=C4)=C4S3)=N2)=C1</chem>     | 10.1021/acs.alchem.2c02532 |                     | 1                   | 0.02       | ThT                    |                 |
| TQLO      | <chem>COC1=CC=C2C(C=CC(/C=C(C#N)/C3=NC(C=CC=C4)=C4S3)=N2)=C1</chem>        | 10.1021/acs.alchem.2c02532 |                     | 120                 | 21         | ThT                    |                 |
| TQX       | <chem>N#C/C(C1=NC(C=CC=C2)=C2S1)=C\C3=NC4=CC=CC=C4N=C3</chem>              | 10.1021/acs.alchem.2c02532 |                     | 25                  | 8          | ThT                    |                 |
| TQX7N     | <chem>CN(C)C1=CC=C(N=CC(/C=C(C#N)/C2=NC(C=CC=C3)=C3S2)=N4)C4=C1</chem>     | 10.1021/acs.alchem.2c02532 |                     | 11                  | 1          | ThT                    |                 |
| TQXN-1    | <chem>CN(C)C1=CC=C2C(N=CC(/C=C(C#N)/C3=NC(C=CC=C4)=C4S3)=N2)=C1</chem>     | 10.1021/acs.alchem.2c02532 |                     | 2                   | 0.9        | ThT                    |                 |
| TQXN-2    | <chem>CN(C)C1=CC=C2C(N=CC(/C=C/C=C(C#N)/C3=NC(C=CC=C4)=C4S3)=N2)=C1</chem> | 10.1021/acs.alchem.2c02532 |                     | 0.9                 | 0.03       | ThT                    |                 |
| PAD-1     | <chem>CC(OC(/C=C/C1=CC=C(N(C)C)C=C1)=C\2)=CC2=C(C#N)\C#N</chem>            | 10.1021/acs.alchem.5b00017 | 58.9                |                     |            |                        |                 |
| Fu2016-8a | <chem>N#C/C(C#N)=C/C1=CC(C=CC(N(C)CCO)=C2)=C2C=C1</chem>                   | 10.1021/acs.alchem.5b04441 | >10000              |                     |            |                        |                 |
| Fu2016-8b | <chem>N#C/C(C#N)=C/C=C/C1=CC(C=CC(N(C)CCO)=C2)=C2C=C1</chem>               | 10.1021/acs.alchem.5b04441 | 38.5                |                     | 6.9        |                        |                 |
| Fu2016-8c | <chem>N#C/C(C#N)=C/C=C/C=C/C1=CC(C=CC(N(C)CCO)=C2)=C2C=C1</chem>           | 10.1021/acs.alchem.5b04441 | 14.5                |                     | 3.9        |                        |                 |
| Fu2016-9a | <chem>N#C/C(C#N)=C/C1=CC(C=CC(N(CCO)CCO)=C2)=C2C=C1</chem>                 | 10.1021/acs.alchem.5b04441 | >10000              |                     |            |                        |                 |
| Fu2016-9b | <chem>N#C/C(C#N)=C/C=C/C1=CC(C=CC(N(CCO)CCO)=C2)=C2C=C1</chem>             | 10.1021/acs.alchem.5b04441 | 197                 |                     | 43.6       |                        |                 |

| Compound  | SMILES                                                                         | DOI                        | K <sub>d</sub> / nM | K <sub>i</sub> / nM | Error / nM | K <sub>i</sub> against | Two-site model? |
|-----------|--------------------------------------------------------------------------------|----------------------------|---------------------|---------------------|------------|------------------------|-----------------|
| Fu2016-9c | <chem>N#C/C(C#N)=C/C=C/C=C/C1=CC(C=CC(N(CCO)CCO)=C2)=C2C=C1</chem>             | 10.1021/acs.alchem.5b04441 | 19.9                |                     | 4.5        |                        |                 |
| Zhou10a   | <chem>CN(C)C1=CC=C2C(C=CC(/C=C(C(OCCOCCOCCO)=O)\C#N)=C2)=C1</chem>             | 10.1021/acs.alchem.8b01712 | 467.33              |                     | 136.5      |                        |                 |
| Zhou10b   | <chem>CN(C)C1=CC=C2C(C=CC(/C=C/C=C(C(OCCOCCOCCO)=O)\C#N)=C2)=C1</chem>         | 10.1021/acs.alchem.8b01712 | 32.93               |                     | 7.63       |                        |                 |
| Zhou10c   | <chem>CN(C)C1=CC=C2C(C=CC(/C=C/C=C/C=C(C(OCCOCCOCCO)=O)\C#N)=C2)=C1</chem>     | 10.1021/acs.alchem.8b01712 | 6.49                |                     | 1.06       |                        |                 |
| Zhou10d   | <chem>CN(C)C1=CC=C2C(C=CC(/C=C/C=C/C=C/C=C(C(OCCOCCOCCO)=O)\C#N)=C2)=C1</chem> | 10.1021/acs.alchem.8b01712 | 15.93               |                     | 3.81       |                        |                 |
| Zhou11a   | <chem>CN(C)C1=CC=C2C(C=CC(/C=C(C(OCCO)=O)\C#N)=C2)=C1</chem>                   | 10.1021/acs.alchem.8b01712 | 144.77              |                     | 4.25       |                        |                 |
| Zhou11b   | <chem>CN(C)C1=CC=C2C(C=CC(/C=C/C=C(C(OCCO)=O)\C#N)=C2)=C1</chem>               | 10.1021/acs.alchem.8b01712 | 46.49               |                     | 6.1        |                        |                 |
| Zhou11c   | <chem>CN(C)C1=CC=C2C(C=CC(/C=C/C=C/C=C(C(OCCO)=O)\C#N)=C2)=C1</chem>           | 10.1021/acs.alchem.8b01712 | 52.16               |                     | 9.6        |                        |                 |
| Zhou11d   | <chem>CN(C)C1=CC=C2C(C=CC(/C=C/C=C/C=C/C=C(C(OCCO)=O)\C#N)=C2)=C1</chem>       | 10.1021/acs.alchem.8b01712 | 8.24                |                     | 1.65       |                        |                 |
| Zhou12a   | <chem>CN(C)C1=CC=C2C(C=CC(/C=C(C(OCCOCCO)=O)\C#N)=C2)=C1</chem>                | 10.1021/acs.alchem.8b01712 | 152.4               |                     | 1.31       |                        |                 |
| Zhou12b   | <chem>CN(C)C1=CC=C2C(C=CC(/C=C/C=C(C(OCCOCCO)=O)\C#N)=C2)=C1</chem>            | 10.1021/acs.alchem.8b01712 | 62.43               |                     | 8.4        |                        |                 |
| Zhou12c   | <chem>CN(C)C1=CC=C2C(C=CC(/C=C/C=C/C=C(C(OCCOCCO)=O)\C#N)=C2)=C1</chem>        | 10.1021/acs.alchem.8b01712 | 51.32               |                     | 11.29      |                        |                 |
| Zhou12d   | <chem>CN(C)C1=CC=C2C(C=CC(/C=C/C=C/C=C/C=C(C(OCCOCCO)=O)\C#N)=C2)=C1</chem>    | 10.1021/acs.alchem.8b01712 | 7.28                |                     | 3.54       |                        |                 |
| Zhou13a   | <chem>CN(C)C1=CC=C2C(C=CC(/C=C(C(OCCOCCOCCO)=O)\C#N)=C2)=C1</chem>             | 10.1021/acs.alchem.8b01712 | 259.53              |                     | 50.63      |                        |                 |
| Zhou13b   | <chem>CN(C)C1=CC=C2C(C=CC(/C=C/C=C(C(OCCOCCOCCO)=O)\C#N)=C2)=C1</chem>         | 10.1021/acs.alchem.8b01712 | 49.16               |                     | 12.6       |                        |                 |

| Compound | SMILES                                                                       | DOI                          | K <sub>d</sub> / nM | K <sub>i</sub> / nM | Error / nM | K <sub>i</sub> against | Two-site model? |
|----------|------------------------------------------------------------------------------|------------------------------|---------------------|---------------------|------------|------------------------|-----------------|
| Zhou13c  | <chem>CN(C)C1=CC=C2C(C=CC(/C=C/C=C/C=C/C(C(OCCOCCOCCO)=O)\C#N)=C2)=C1</chem> | 10.1021/acs.alchem.8b01712   | 44.57               |                     | 10.81      |                        |                 |
| Zhou13d  | <chem>CN(C)C1=CC=C2C(C=CC(/C=C/C=C/C=C/C(C(OCCOCCOCCO)=O)\C#N)=C2)=C1</chem> | 10.1021/acs.alchem.8b01712   | 35.03               |                     | 12.1       |                        |                 |
| Zhou7a   | <chem>CN(C)C1=CC=C2C(C=CC(/C=C/C(C(OC)=O)\C#N)=C2)=C1</chem>                 | 10.1021/acs.alchem.8b01712   | 359.13              |                     | 77.21      |                        |                 |
| Zhou7b   | <chem>CN(C)C1=CC=C2C(C=CC(/C=C/C=C(C(OC)=O)\C#N)=C2)=C1</chem>               | 10.1021/acs.alchem.8b01712   | 39.44               |                     | 12.32      |                        |                 |
| Zhou7c   | <chem>CN(C)C1=CC=C2C(C=CC(/C=C/C=C/C=C(C(C(OC)=O)\C#N)=C2)=C1</chem>         | 10.1021/acs.alchem.8b01712   | 10.34               |                     | 1.05       |                        |                 |
| Zhou7d   | <chem>CN(C)C1=CC=C2C(C=CC(/C=C/C=C/C=C/C(C(OC)=O)\C#N)=C2)=C1</chem>         | 10.1021/acs.alchem.8b01712   | 8.11                |                     | 0.65       |                        |                 |
| Zhou8a   | <chem>CN(C)C1=CC=C2C(C=CC(/C=C/C(C(OCCOC)=O)\C#N)=C2)=C1</chem>              | 10.1021/acs.alchem.8b01712   | 164.5               |                     | 10.22      |                        |                 |
| Zhou8b   | <chem>CN(C)C1=CC=C2C(C=CC(/C=C/C=C(C(OCCOC)=O)\C#N)=C2)=C1</chem>            | 10.1021/acs.alchem.8b01712   | 30.92               |                     | 6.38       |                        |                 |
| Zhou8c   | <chem>CN(C)C1=CC=C2C(C=CC(/C=C/C=C/C=C(C(OCCOC)=O)\C#N)=C2)=C1</chem>        | 10.1021/acs.alchem.8b01712   | 30.97               |                     | 5.37       |                        |                 |
| Zhou8d   | <chem>CN(C)C1=CC=C2C(C=CC(/C=C/C=C/C=C/C(C(OCCOC)=O)\C#N)=C2)=C1</chem>      | 10.1021/acs.alchem.8b01712   | 23.1                |                     | 10.43      |                        |                 |
| Zhou9a   | <chem>CN(C)C1=CC=C2C(C=CC(/C=C/C(C(OCCOCCOC)=O)\C#N)=C2)=C1</chem>           | 10.1021/acs.alchem.8b01712   | 415.17              |                     | 93.57      |                        |                 |
| Zhou9b   | <chem>CN(C)C1=CC=C2C(C=CC(/C=C/C=C(C(OCCOCCOC)=O)\C#N)=C2)=C1</chem>         | 10.1021/acs.alchem.8b01712   | 39.99               |                     | 12.84      |                        |                 |
| Zhou9c   | <chem>CN(C)C1=CC=C2C(C=CC(/C=C/C=C/C=C(C(OCCOCCOC)=O)\C#N)=C2)=C1</chem>     | 10.1021/acs.alchem.8b01712   | 24.59               |                     | 4.89       |                        |                 |
| Zhou9d   | <chem>CN(C)C1=CC=C2C(C=CC(/C=C/C=C/C=C/C(C(OCCOCCOC)=O)\C#N)=C2)=C1</chem>   | 10.1021/acs.alchem.8b01712   | 15.37               |                     | 3.4        |                        |                 |
| QAD-1    | <chem>F[B-]1(F)N2C(C(CCCN3C(CC=C4)=C4NCC3)=C5[N+])1=C(C)C=C5C)=C(C)C=</chem> | 10.1021/acs.conjchem.8b00623 | 27                  |                     |            |                        |                 |

| Compound        | SMILES                                                                                    | DOI                          | K <sub>d</sub> / nM | K <sub>i</sub> / nM | Error / nM | K <sub>i</sub> against | Two-site model? |
|-----------------|-------------------------------------------------------------------------------------------|------------------------------|---------------------|---------------------|------------|------------------------|-----------------|
|                 | <chem>C2/C=C/C6=CC=C(N(C)C)S6</chem>                                                      |                              |                     |                     |            |                        |                 |
| Chu2015-18F]46a | <chem>O=C1N(CC2=CC=C(OCC[18F])C=C2)C3=CC=CC=C3/C1=C/C=C/C4=CC=C([N+])([O-])=O)C=C4</chem> | 10.1021/acs.jmedchem.5b00571 | 271                 |                     |            |                        |                 |
| Chu2015-05      | <chem>O=C1NC2=CC=CC=C2/C1=C\C3=CC=C(N(C)C)C=C3</chem>                                     | 10.1021/acs.jmedchem.5b00571 |                     | 91.6                | 18.5       | ThT                    |                 |
| Chu2015-06      | <chem>O=C1NC2=NC=CC=C2/C1=C/C3=CC=C(N(C)C)C=C3</chem>                                     | 10.1021/acs.jmedchem.5b00571 |                     | 40                  | 22.3       | ThT                    |                 |
| Chu2015-07      | <chem>O=C1NC2=NC=CC=C2/C1=C\C3=CC=C(N(C)C)C=C3</chem>                                     | 10.1021/acs.jmedchem.5b00571 |                     | 94.8                | 22.4       | ThT                    |                 |
| Chu2015-08      | <chem>O=C1N(C)C2=CC=CC=C2/C1=C\C3=CC=C(N(C)C)C=C3</chem>                                  | 10.1021/acs.jmedchem.5b00571 |                     | 155.1               | 8.8        | ThT                    |                 |
| Chu2015-09      | <chem>O=C1N(CC2=CC=CC=C2)C3=CC=CC=C3/C1=C\C4=CC=C(N(C)C)C=C4</chem>                       | 10.1021/acs.jmedchem.5b00571 |                     | 260.4               | 78.5       | ThT                    |                 |
| Chu2015-10      | <chem>O=C1N(CC2=CC=C(OC)=C2)C3=CC=CC=C3/C1=C\C4=CC=C(N(C)C)C=C4</chem>                    | 10.1021/acs.jmedchem.5b00571 |                     | 251.5               | 52         | ThT                    |                 |
| Chu2015-11      | <chem>O=C1N(CC2=CC=NC=C2)C3=CC=CC=C3/C1=C\C4=CC=C(N(C)C)C=C4</chem>                       | 10.1021/acs.jmedchem.5b00571 |                     | 87.1                | 34.1       | ThT                    |                 |
| Chu2015-12      | <chem>O=C1N(C(OCC)=O)C2=CC=CC=C2/C1=C\C3=CC=C(N(C)C)C=C3</chem>                           | 10.1021/acs.jmedchem.5b00571 |                     | 139.9               | 70.1       | ThT                    |                 |
| Chu2015-13      | <chem>O=C1N(CC2=CC=CC=C2)C3=NC=CC=C3/C1=C\C4=CC=C(N(C)C)C=C4</chem>                       | 10.1021/acs.jmedchem.5b00571 |                     | 190.2               | 84.8       | ThT                    |                 |
| Chu2015-14      | <chem>O=C1N(CC2=CC=C(OC)=C2)C3=NC=CC=C3/C1=C\C4=CC=C(N(C)C)C=C4</chem>                    | 10.1021/acs.jmedchem.5b00571 |                     | 113.3               | 2.6        | ThT                    |                 |
| Chu2015-18      | <chem>O=C1NC2=CC=CC=C2/C1=C\C3=CC=CC=C3</chem>                                            | 10.1021/acs.jmedchem.5b00571 |                     | 266.8               | 136.5      | ThT                    |                 |
| Chu2015-19      | <chem>O=C1NC2=CC=CC=C2/C1=C\C3=CC=C(OC)C=C3</chem>                                        | 10.1021/acs.jmedchem.5b00571 |                     | 125.8               | 42.6       | ThT                    |                 |
| Chu2015-20      | <chem>O=C1NC2=CC=CC=C2/C1=C/C=C/C3=CC=C(N(C)C)C=C3</chem>                                 | 10.1021/acs.jmedchem.5b00571 |                     | 27.6                | 4.8        | ThT                    |                 |
| Chu2015-21      | <chem>O=C1NC2=NC=CC=C2/C1=C/C=C/C3=CC=C(N(C)C)C=C3</chem>                                 | 10.1021/acs.jmedchem.5b00571 |                     | 15.3                | 5.5        | ThT                    |                 |

| Compound    | SMILES                                                                              | DOI                          | K <sub>d</sub> / nM | K <sub>i</sub> / nM | Error / nM | K <sub>i</sub> against | Two-site model? |
|-------------|-------------------------------------------------------------------------------------|------------------------------|---------------------|---------------------|------------|------------------------|-----------------|
| Chu2015-22  | <chem>O=C1NC2=CC=C(O)C=C2/C1=C/C=C/C3=CC=C(N(C)C)C=C3</chem>                        | 10.1021/acs.jmedchem.5b00571 |                     | 37.1                | 13.6       | ThT                    |                 |
| Chu2015-23  | <chem>O=C1N(CC2=CC=CC=C2)C3=CC=CC=C3/C1=C/C=C/C4=CC=CC=C4</chem>                    | 10.1021/acs.jmedchem.5b00571 |                     | 703.3               | 214.7      | ThT                    |                 |
| Chu2015-24  | <chem>O=C1N(CC2=CC=CC=C2)C3=CC=CC=C3/C1=C\C=C\C4=CC=C(OC)C=C4</chem>                | 10.1021/acs.jmedchem.5b00571 |                     | 741                 | 254.6      | ThT                    |                 |
| Chu2015-25  | <chem>O=C1N(C)C2=CC=CC=C2/C1=C\C=C\C3=CC=C(N(C)C)C=C3</chem>                        | 10.1021/acs.jmedchem.5b00571 |                     | 56                  | 14.8       | ThT                    |                 |
| Chu2015-26  | <chem>O=C1N(CC2=CC=CC=C2)C3=CC=CC=C3/C1=C\C=C\C4=CC=C(N(C)C)C=C4</chem>             | 10.1021/acs.jmedchem.5b00571 |                     | 357.9               | 161.7      | ThT                    |                 |
| Chu2015-27  | <chem>O=C1N(CC2=CC=C(OC)C=C2)C3=CC=CC=C3/C1=C\C=C\C4=CC=C(N(C)C)C=C4</chem>         | 10.1021/acs.jmedchem.5b00571 |                     | 129.6               | 41.4       | ThT                    |                 |
| Chu2015-28  | <chem>O=C1N(CC2=CC=C([N+])([O-])C=C2)C3=CC=CC=C3/C1=C\C=C\C4=CC=C(N(C)C)C=C4</chem> | 10.1021/acs.jmedchem.5b00571 |                     | 92.4                | 21.9       | ThT                    |                 |
| Chu2015-29  | <chem>O=C1N(CC2=CC=NC=C2)C3=CC=CC=C3/C1=C\C=C\C4=CC=C(N(C)C)C=C4</chem>             | 10.1021/acs.jmedchem.5b00571 |                     | 45.9                | 19.4       | ThT                    |                 |
| Chu2015-30  | <chem>O=C1N(C(OCC)=O)C2=C(C)C=C2/C1=C\C=C\C3=CC=C(N(C)C)C=C3</chem>                 | 10.1021/acs.jmedchem.5b00571 |                     | 84                  | 35         | ThT                    |                 |
| Chu2015-31  | <chem>O=C1N(CC2=CC=CC=C2)C3=NC=CC=C3/C1=C\C=C\C4=CC=C(N(C)C)C=C4</chem>             | 10.1021/acs.jmedchem.5b00571 |                     | 85.1                | 23         | ThT                    |                 |
| Chu2015-32  | <chem>O=C1N(CC2=CC=C(OC)C=C2)C3=NC=CC=C3/C1=C\C=C\C4=CC=C(N(C)C)C=C4</chem>         | 10.1021/acs.jmedchem.5b00571 |                     | 107                 | 18.9       | ThT                    |                 |
| Chu2015-33  | <chem>O=C1N(CC2=CC=C(N)C=C2)C3=CC=CC=C3/C1=C\C=C\C4=CC=C(N(C)C)C=C4</chem>          | 10.1021/acs.jmedchem.5b00571 |                     | 98.91               | 12.1       | ThT                    |                 |
| Chu2015-35  | <chem>O=C1N(C2=CC=CC=C2)C3=CC=CC=C3/C1=C\C=C\C4=CC=C(N(C)C)C=C4</chem>              | 10.1021/acs.jmedchem.5b00571 |                     | 179.2               | 71.3       | ThT                    |                 |
| Chu2015-36  | <chem>O=C1N(C2=CC=CC=C2)C3=CC=CC=C3/C1=C/C=C/C4=CC=C(N(C)C)C=C4</chem>              | 10.1021/acs.jmedchem.5b00571 |                     | 286.8               | 142.2      | ThT                    |                 |
| Chu2015-38a | <chem>O=C1NC2=CC=CC=C2/C1=C/C3=CC=C([N+])([O-])C=C3</chem>                          | 10.1021/acs.jmedchem.5b00571 |                     | 325.2               | 73.5       | ThT                    |                 |

| Compound    | SMILES                                                                                | DOI                          | $K_d$ / nM | $K_i$ / nM | Error / nM | $K_i$ against | Two-site model? |
|-------------|---------------------------------------------------------------------------------------|------------------------------|------------|------------|------------|---------------|-----------------|
| Chu2015-38b | <chem>O=C1NC2=CC=CC=C2/C1=C\C3=CC=C([N+][O-])=O)C=C3</chem>                           | 10.1021/acs.jmedchem.5b00571 |            | 439.2      | 162.8      | ThT           |                 |
| Chu2015-39a | <chem>O=C1N(CC2=CC=CC=C2)C3=CC=CC=C3/C1=C/C4=CC=C([N+][O-])=O)C=C4</chem>             | 10.1021/acs.jmedchem.5b00571 |            | 459.5      | 49.9       | ThT           |                 |
| Chu2015-39b | <chem>O=C1N(CC2=CC=CC=C2)C3=CC=CC=C3/C1=C\C4=CC=C([N+][O-])=O)C=C4</chem>             | 10.1021/acs.jmedchem.5b00571 |            | 694.7      | 72         | ThT           |                 |
| Chu2015-41a | <chem>O=C1NC2=CC=CC=C2/C1=C/C=C\C3=CC=C([N+][O-])=O)C=C3</chem>                       | 10.1021/acs.jmedchem.5b00571 |            | 36.2       | 12.9       | ThT           |                 |
| Chu2015-41b | <chem>O=C1NC2=CC=CC=C2/C1=C\C=C\C3=CC=C([N+][O-])=O)C=C3</chem>                       | 10.1021/acs.jmedchem.5b00571 |            | 60         | 19.1       | ThT           |                 |
| Chu2015-42a | <chem>O=C1N(CC2=CC=CC=C2)C3=CC=CC=C3/C1=C/C=C/C4=CC=C([N+][O-])=O)C=C4</chem>         | 10.1021/acs.jmedchem.5b00571 |            | 214.2      | 52.1       | ThT           |                 |
| Chu2015-42b | <chem>O=C1N(CC2=CC=CC=C2)C3=CC=CC=C3/C1=C\C=C\C4=CC=C([N+][O-])=O)C=C4</chem>         | 10.1021/acs.jmedchem.5b00571 |            | 235.4      | 143        | ThT           |                 |
| Chu2015-43a | <chem>O=C1N(CC2=CC=C(OC)C=C2)C3=CC=CC=C3/C1=C/C=C/C4=CC=C([N+][O-])=O)C=C4</chem>     | 10.1021/acs.jmedchem.5b00571 |            | 130.8      | 64.4       | ThT           |                 |
| Chu2015-43b | <chem>O=C1N(CC2=CC=C(OC)C=C2)C3=CC=CC=C3/C1=C\C=C\C4=CC=C([N+][O-])=O)C=C4</chem>     | 10.1021/acs.jmedchem.5b00571 |            | 138.5      | 40.2       | ThT           |                 |
| Chu2015-44a | <chem>O=C1N(CC2=CC(OC)=CC=C2)C3=CC=CC=C3/C1=C/C=C/C4=CC=C([N+][O-])=O)C=C4</chem>     | 10.1021/acs.jmedchem.5b00571 |            | 109.7      | 0.4        | ThT           |                 |
| Chu2015-44b | <chem>O=C1N(CC2=CC(OC)=CC=C2)C3=CC=CC=C3/C1=C\C=C\C4=CC=C([N+][O-])=O)C=C4</chem>     | 10.1021/acs.jmedchem.5b00571 |            | 264.8      | 64.4       | ThT           |                 |
| Chu2015-45a | <chem>O=C1N(CC2=CC(OC)=C(OC)C=C2)C3=CC=CC=C3/C1=C/C=C/C4=CC=C([N+][O-])=O)C=C4</chem> | 10.1021/acs.jmedchem.5b00571 |            | 73.6       | 27.3       | ThT           |                 |
| Chu2015-45b | <chem>O=C1N(CC2=CC(OC)=C(OC)C=C2)C3=CC=CC=C3/C1=C\C=C\C4=CC=C([N+][O-])=O)C=C4</chem> | 10.1021/acs.jmedchem.5b00571 |            | 129.5      | 16         | ThT           |                 |



| Compound     | SMILES                                                                               | DOI                          | K <sub>d</sub> / nM | K <sub>i</sub> / nM | Error / nM | K <sub>i</sub> against | Two-site model? |
|--------------|--------------------------------------------------------------------------------------|------------------------------|---------------------|---------------------|------------|------------------------|-----------------|
| Chu2015-46a  | <chem>O=C1N(CC2=CC=C(OCCF)C=C2)C3=CC=CC=C3/C1=C/C=C/C4=CC=C([N+]([O-])=O)C=C4</chem> | 10.1021/acs.jmedchem.5b00571 |                     | 142.4               | 36.9       | ThT                    |                 |
| Chu2015-46b  | <chem>O=C1N(CC2=CC=C(OCCF)C=C2)C3=CC=CC=C3/C1=C\C=C\C4=CC=C([N+](O-))=O)C=C4</chem>  | 10.1021/acs.jmedchem.5b00571 |                     | 125.3               | 40.1       | ThT                    |                 |
| Chu2015-47   | <chem>O=C1NC2=CC=CC=C2/C1=C\C=C\C3=CC=C(N)C=C3</chem>                                | 10.1021/acs.jmedchem.5b00571 |                     | 50.8                | 18.5       | ThT                    |                 |
| ThT          | <chem>OC1=CC=C([N+](C)=C(C2=CC=C(N(C)C)C=C2)S3)C3=C1</chem>                          | 10.1021/acs.jmedchem.5b00571 | 32                  |                     |            |                        |                 |
| Fu3a         | <chem>CN(C)C1=CC(C=CC/C=C(C#N)/C#N)=C2)C=C1</chem>                                   | 10.1021/acs.jmedchem.5b00861 | 44.8                |                     | 15.3       |                        |                 |
| Fu3b         | <chem>CN(C)C1=CC(C=CC/C=C/C=C(C#N)/C#N)=C2)C=C1</chem>                               | 10.1021/acs.jmedchem.5b00861 | 8.8                 |                     | 1.5        |                        |                 |
| Fu3c         | <chem>CN(C)C1=CC(C=CC/C=C/C=C/C=C(C#N)/C#N)=C2)C=C1</chem>                           | 10.1021/acs.jmedchem.5b00861 | 1.9                 |                     | 1.1        |                        |                 |
| BTDSB        | <chem>OC1=CC=C(/C=C/C(C2=NSN=C23)=CC=C3/C=C/C4=CC(C(O)=O)=C(O)C=C4)C=C1(O)=O</chem>  | 10.1021/acs.jmedchem.8b01681 | 83                  |                     | 6          |                        |                 |
| DF-9         | <chem>OC1=CC=C(/C=C/C2=CC=C(/C=C/C3=CC=C(O)C=C3)C=C2)C=C1</chem>                     | 10.1021/acs.jmedchem.8b01681 | 137                 |                     | 10         |                        |                 |
| X-34         | <chem>OC1=CC=C(/C=C/C2=CC=C(/C=C/C3=CC(C(O)=O)=C(O)C=C3)C=C2)C=C1(O)=O</chem>        | 10.1021/acs.jmedchem.8b01681 | 149                 |                     | 8          |                        |                 |
| Zhang2019-3a | <chem>C(/C=C/C1=CC=CC=C1)(C2=NSN=C23)=CC=C3/C=C/C4=CC=CC=C4</chem>                   | 10.1021/acs.jmedchem.8b01681 | 66                  |                     | 8          |                        |                 |
| Zhang2019-3b | <chem>OC(C=C1)=CC=C1/C=C/C2=CC=C(C3=NSN=C32)/C=C/C4=CC=CC=C4</chem>                  | 10.1021/acs.jmedchem.8b01681 | 39                  |                     | 1          |                        |                 |
| Zhang2019-3c | <chem>OC(C=C1)=CC=C1/C=C/C(C2=NSN=C23)=CC=C3/C=C/C4=CC=C(O)C=C4</chem>               | 10.1021/acs.jmedchem.8b01681 | 20                  |                     | 2          |                        |                 |
| Zhang2019-3d | <chem>OC(C=C1)=C(O)C=C1/C=C/C(C2=NSN=C23)=CC=C3/C=C/C4=CC=C(O)C(O)=C4</chem>         | 10.1021/acs.jmedchem.8b01681 | 39                  |                     | 4          |                        |                 |
| Zhang2019-3e | <chem>OC(C=C1)=C(O)C=C1/C=C/C(C2=NSN=C23)=CC=C3</chem>                               | 10.1021/acs.jmedchem.8b01681 | 31                  |                     | 4          |                        |                 |

| Compound     | SMILES                                                                                       | DOI                               | K <sub>d</sub> / nM | K <sub>i</sub> / nM | Error / nM | K <sub>i</sub> against | Two-site model? |
|--------------|----------------------------------------------------------------------------------------------|-----------------------------------|---------------------|---------------------|------------|------------------------|-----------------|
|              | <chem>C3/C=C/C4=CC=C(O)C=C4</chem>                                                           |                                   |                     |                     |            |                        |                 |
| Zhang2019-3f | <chem>OC1=CC(O)=CC(/C=C/C(C2=NSN=C23)=CC=C3/C=C/C4=CC(O)=CC(O)=C4)=C1</chem>                 | 10.1021/acs.jmedchem.8b01681      | 95                  |                     | 1          |                        |                 |
| Zhang2019-3g | <chem>OC(C=C1)=CC=C1/C=C/C2=CC=C(C3=NSN=C32)/C=C/C4=CC(O)=CC(O)=C4</chem>                    | 10.1021/acs.jmedchem.8b01681      | 73                  |                     | 7          |                        |                 |
| Zhang2019-3h | <chem>OC1=CC(/C=C/C2=CC=C(C3=NSN=C32)/C=C/C4=CC(O)=CC=C4)=CC=C1</chem>                       | 10.1021/acs.jmedchem.8b01681      | 116                 |                     | 10         |                        |                 |
| Zhang2019-3i | <chem>OC(C=C1)=C(O)C=C1/C=C/C(C2=NSN=C23)=CC=C3/C=C/C4=CC=CC(O)=C4</chem>                    | 10.1021/acs.jmedchem.8b01681      | 77                  |                     | 1          |                        |                 |
| Zhang2019-3j | <chem>OC(C=CC=C1)=C1/C=C/C(C2=NSN=C23)=CC=C3/C=C/C4=CC=CC=C4O</chem>                         | 10.1021/acs.jmedchem.8b01681      | 29                  |                     | 5          |                        |                 |
| Zhang2019-4  | <chem>OC(C=C1)=CC=C1C(C2=NSN=C23)=CC=C3C4=CC=C(O)C=C4</chem>                                 | 10.1021/acs.jmedchem.8b01681      | 511                 |                     | 29         |                        |                 |
| Zhang2019-5  | <chem>OC(C=C1)=CC=C1C#CC(C=C2)=CC=C2C(C3=NSN=C34)=CC=C4C5=CC=C(C#CC6=CC=C(O)C=C6)C=C5</chem> | 10.1021/acs.jmedchem.8b01681      | 36                  |                     | 3          |                        |                 |
| Zhang2019-6  | <chem>OC(C=C1)=CC=C1C(C=C2)=CC=C2C(C3=NSN=C34)=CC=C4C5=CC=C(C6=CC=C(O)C=C6)C=C5</chem>       | 10.1021/acs.jmedchem.8b01681      | 40                  |                     | 4          |                        |                 |
| Zhang2019-7  | <chem>OC(C=C1)=CC=C1C2=CC=C(S2)C(C3=NSN=C34)=CC=C4C5=CC=C(C6=CC=C(O)C=C6)S5</chem>           | 10.1021/acs.jmedchem.8b01681      | 10                  |                     | 1          |                        |                 |
| [18F]2FBox   | <chem>CN(S(C1=C(F)C=CC=C1)(=O)=O)C(C=C2)=CC=C2/C=C/C3=NC4=CC=CC=C4O3</chem>                  | 10.1021/acs.molpharmaceut.8b00229 | 145.3               |                     |            |                        |                 |
| [18F]4FBox   | <chem>CN(S(C1=CC=C(F)C=C1)(=O)=O)C(C=C2)=CC=C2/C=C/C3=NC4=CC=CC=C4O3</chem>                  | 10.1021/acs.molpharmaceut.8b00229 | 7.7                 |                     |            |                        |                 |
| [18F]BF227   | <chem>FCCOC1=CC=C2C(OC(/C=C/C3=CN=C(N(C)C)S3)=N2)=C1</chem>                                  | 10.1021/acs.molpharmaceut.8b00229 | 0.82                |                     | 1.08       |                        | Site 1          |
| [18F]BF227   | <chem>FCCOC1=CC=C2C(OC(/C=C/C3=CN=C(N(C)C)S3)=N2)=C1</chem>                                  | 10.1021/acs.molpharmaceut.8b00229 | 125.2               |                     | 29.05      |                        | Site 2          |

| Compound | SMILES                                                                                  | DOI                          | K <sub>d</sub> / nM | K <sub>i</sub> / nM | Error / nM | K <sub>i</sub> against | Two-site model? |
|----------|-----------------------------------------------------------------------------------------|------------------------------|---------------------|---------------------|------------|------------------------|-----------------|
| RM-27    | <chem>CN(C)C(C=C1)=CC=C1/C=C/C=C/C2=[N+](CC)C(C=CC=C3)=C3S2</chem>                      | 10.1021/acschemneuro.2c00361 | 94.176              |                     | 1.36       |                        |                 |
| RM-28    | <chem>CN(CCO)C(C=C1)=CC=C1/C=C/C=C/C2=[N+](CC)C(C=CC=C3)=C3S2</chem>                    | 10.1021/acschemneuro.2c00361 | 175.69              |                     | 4.87       |                        |                 |
| Seo3g    | <chem>CN(C)C1=CC(OC)=C(/C=C/C=C/C=C(C#N)/C(OCC2=CC=NC=C2)=O)C(OC)=C1</chem>             | 10.1021/acschemneuro.6b00174 | 500                 |                     |            |                        |                 |
| Seo3h    | <chem>CN(C)C1=CC(OC)=C(/C=C/C=C/C=C(C#N)/C(OCC2=CC=CO2)=O)C(OC)=C1</chem>               | 10.1021/acschemneuro.6b00174 | 1020                |                     |            |                        |                 |
| Dao4a1   | <chem>CN1C2=CC=CC=C2SC3=C1C=CC(/C=C4C(N(CC(OCC)=O)C(S/4)=S)=O)=C3</chem>                | 10.1021/acschemneuro.6b00380 | 7.5                 |                     | 0.4        |                        |                 |
| Dao4a2   | <chem>CN1C2=CC=CC=C2SC3=C1C=CC(/C=C4C(N(CC(O)C(C)(C)C)=O)C(S/4)=S)=O)=C3</chem>         | 10.1021/acschemneuro.6b00380 | 41.5                |                     | 3.5        |                        |                 |
| Dao4b1   | <chem>CN1C2=CC(Cl)=CC=C2SC3=C1C=CC(/C=C4C(N(CC(OCC)=O)C(S/4)=S)=O)=C3</chem>            | 10.1021/acschemneuro.6b00380 | 74.2                |                     | 5.4        |                        |                 |
| Dao4b2   | <chem>CN1C2=CC(Cl)=CC=C2SC3=C1C=CC(/C=C4C(N(CC(OC(C)(C)C)=O)C(S/4)=S)=O)=C3</chem>      | 10.1021/acschemneuro.6b00380 | 117.3               |                     | 8.7        |                        |                 |
| Dao4c2   | <chem>CN1C2=CC(N(CC)CC)=CC=C2SC3=C1C=CC(/C=C4C(N(CC(OC(C)(C)C)=O)C(S/4)=S)=O)=C3</chem> | 10.1021/acschemneuro.6b00380 | 237.6               |                     | 6.2        |                        |                 |
| Dao5a    | <chem>CN1C2=CC=CC=C2SC3=C1C=CC(/C=C4C(N(CC(O)=O)C(S/4)=S)=O)=C3</chem>                  | 10.1021/acschemneuro.6b00380 | 146.9               |                     | 12.6       |                        |                 |
| Dao5b    | <chem>CN1C2=CC(Cl)=CC=C2SC3=C1C=CC(/C=C4C(N(CC(O)=O)C(S/4)=S)=O)=C3</chem>              | 10.1021/acschemneuro.6b00380 | 695.8               |                     | 14.9       |                        |                 |
| Dao5c    | <chem>CN1C2=CC(N(CC)CC)=CC=C2SC3=C1C=CC(/C=C4C(N(CC(O)=O)C(S/4)=S)=O)=C3</chem>         | 10.1021/acschemneuro.6b00380 | 204.8               |                     | 20.1       |                        |                 |
| Dao6     | <chem>CN1C2=CC=CC=C2SC3=C1C=CC(/C=C4C(N(CC(O)N(C)C)=O)C(S/4)=S)=O)=C3</chem>            | 10.1021/acschemneuro.6b00380 | 96.4                |                     | 8.3        |                        |                 |
| Dao7a1   | <chem>CN1C2=CC=CC=C2SC3=C1C=CC(/C=C4C(N(CCC(OCC)=O)C(S/4)=S)=O)=C3</chem>               | 10.1021/acschemneuro.6b00380 | 28.5                |                     | 2.5        |                        |                 |

| Compound               | SMILES                                                                         | DOI                            | K <sub>d</sub> / nM | K <sub>i</sub> / nM | Error / nM | K <sub>i</sub> against | Two-site model? |
|------------------------|--------------------------------------------------------------------------------|--------------------------------|---------------------|---------------------|------------|------------------------|-----------------|
| Dao7a2                 | <chem>CN1C2=CC=CC=C2SC3=C1C=CC(/C=C4C(N(CCC(OC(C)C)C)=O)C(S/4)=S)=O)=C3</chem> | 10.1021/acschemneuro.6b00380   | 14.9                |                     | 1.3        |                        |                 |
| Dao8                   | <chem>CN1C2=CC=CC=C2SC3=C1C=CC(/C=C4C(N(CCC(O)=O)C(S/4)=S)=O)=C3</chem>        | 10.1021/acschemneuro.6b00380   | 212.5               |                     | 24.3       |                        |                 |
| ThT                    | <chem>OC1=CC=C([N+])(C)=C(C2=CC=C(N(C)C)C=C2)S3C3=C1</chem>                    | 10.1021/acschemneuro.6b00380   | 1942                |                     | 32.1       |                        |                 |
| PP-BTA-3               | <chem>CN(C)C1=CC(N=C(/C=C/C=C(C#N)/C#N)S2)=C2C=C1</chem>                       | 10.1021/acschemneuro.6b00450   | 148                 |                     | 18.1       |                        |                 |
| PP-BTA-4               | <chem>CN(C)C1=CC(N=C(/C=C/C=C(C#N)/C#N)S2)=C2C=C1</chem>                       | 10.1021/acschemneuro.6b00450   | 40.1                |                     | 3.9        |                        |                 |
| PP-BTA-5               | <chem>CN(C)C1=CC(N=C(/C=C/C=C/C=C(C#N)/C#N)S2)=C2C=C1</chem>                   | 10.1021/acschemneuro.6b00450   | 57.3                |                     | 8.7        |                        |                 |
| ThT                    | <chem>OC1=CC=C([N+])(C)=C(C2=CC=C(N(C)C)C=C2)S3C3=C1</chem>                    | 10.1021/acschemneuro.6b00450   | 430.4               |                     | 33.5       |                        |                 |
| [ <sup>125</sup> I]ISQ | <chem>[125I]C1=CC=C(N=C2)C(N=C2/C=C/C3=CC=C(C=C3)N(C)C)=C1</chem>              | 10.1021/acsmedchemlett.2c00279 | 8.53                |                     |            |                        |                 |
| SQ1                    | <chem>FCCOC1=CC=C(N=CC(/C=C/C2=CC=C(N(C)C)C=C2)=N3)C3=C1</chem>                | 10.1021/acsmedchemlett.2c00279 |                     | 83.6                | 59.2       | [ <sup>125</sup> I]ISQ |                 |
| SQ10                   | <chem>CN(C)C(C=C1)=CC=C1/C=C/C2=NC3=CC=C(N4C=CN=N4)C=C3C=C2</chem>             | 10.1021/acsmedchemlett.2c00279 |                     | 21                  | 2.2        | [ <sup>125</sup> I]ISQ |                 |
| SQ11                   | <chem>FCCOC1=CC=C(C=C2)C(N=C2/C=C/C3=CC=C(C=C3)[N+])([O-])=O=C1</chem>         | 10.1021/acsmedchemlett.2c00279 |                     | >1000               |            | [ <sup>125</sup> I]ISQ |                 |
| SQ12                   | <chem>FCCOC(C=C1C=C2)=CC=C1N=C2/C=C/C3=CC=C(C=C3)[N+])([O-])=O</chem>          | 10.1021/acsmedchemlett.2c00279 |                     | 31.7                | 11.3       | [ <sup>125</sup> I]ISQ |                 |
| SQ13                   | <chem>CN(C)C(C=C1)=CC=C1/C=C/C2=NC3=CC(OCCOCCOCCF)=CC=C3C=C2</chem>            | 10.1021/acsmedchemlett.2c00279 |                     | >1000               |            | [ <sup>125</sup> I]ISQ |                 |
| SQ14                   | <chem>CN(C)C(C=C1)=CC=C1/C=C/C2=NC3=CC(OCCOCCOCCF)C=C3C=C2</chem>              | 10.1021/acsmedchemlett.2c00279 |                     | 9.56                | 1.57       | [ <sup>125</sup> I]ISQ |                 |
| SQ15                   | <chem>CN(C)C(C=C1)=CC=C1/C=C/C2=NC3=CC(OCC(O)CF)=CC=C3C=C2</chem>              | 10.1021/acsmedchemlett.2c00279 |                     | >1000               |            | [ <sup>125</sup> I]ISQ |                 |
| SQ16                   | <chem>CN(C)C(C=C1)=CC=C1/C=C/C2=NC3=CC(OCC(O)CF)C=C3C=C2</chem>                | 10.1021/acsmedchemlett.2c00279 |                     | 200                 | 22.8       | [ <sup>125</sup> I]ISQ |                 |

| Compound      | SMILES                                                                  | DOI                            | K <sub>d</sub> / nM | K <sub>i</sub> / nM | Error / nM | K <sub>i</sub> against | Two-site model? |
|---------------|-------------------------------------------------------------------------|--------------------------------|---------------------|---------------------|------------|------------------------|-----------------|
| SQ2           | <chem>CN(C)C(C=C1)=CC=C1/C=C/C2=NC3=CC=C(OCCF)C=C3N=C2</chem>           | 10.1021/acsmedchemlett.2c00279 |                     | 11.7                | 0.97       | [ <sup>125</sup> I]ISQ |                 |
| SQ3           | <chem>CN(C)C(C=C1)=CC=C1/C=C/C2=NC3=CC(OCCF)=CC=C3C=C2</chem>           | 10.1021/acsmedchemlett.2c00279 |                     | 230                 | 49.1       | [ <sup>125</sup> I]ISQ |                 |
| SQ4           | <chem>CN(C)C(C=C1)=CC=C1/C=C/C2=NC3=CC=C(OCCF)C=C3C=C2</chem>           | 10.1021/acsmedchemlett.2c00279 |                     | 7.69                | 0.86       | [ <sup>125</sup> I]ISQ |                 |
| SQ5           | <chem>CN(C)C(C=C1)=CC=C1/C=C/C2=NC3=CC=CC(OCCF)=C3C=C2</chem>           | 10.1021/acsmedchemlett.2c00279 |                     | 6.26                | 3.83       | [ <sup>125</sup> I]ISQ |                 |
| SQ6           | <chem>CN(C)C(C=C1)=CC=C1/C=C/C2=NC3=C(OCCF)C=CC=C3C=C2</chem>           | 10.1021/acsmedchemlett.2c00279 |                     | >1000               |            | [ <sup>125</sup> I]ISQ |                 |
| SQ7           | <chem>FCCOC1=CC=C2C=CC(/C=C/C3=CC=C(N=C3)N(C)C)=NC2=C1</chem>           | 10.1021/acsmedchemlett.2c00279 |                     | >1000               |            | [ <sup>125</sup> I]ISQ |                 |
| SQ8           | <chem>CN(C)C(N=C1)=CC=C1/C=C/C2=NC3=CC=C(OCCF)C=C3C=C2</chem>           | 10.1021/acsmedchemlett.2c00279 |                     | 47.8                | 4.84       | [ <sup>125</sup> I]ISQ |                 |
| SQ9           | <chem>CN(C)C(C=C1)=CC=C1/C=C/C2=NC3=CC(N4N=NC=C4)=CC=C3C=C2</chem>      | 10.1021/acsmedchemlett.2c00279 |                     | >1000               |            | [ <sup>125</sup> I]ISQ |                 |
| Zhang17-2     | <chem>OC1=C(O)C=CC(/C=C/C2=CC=CC=C2)=C1</chem>                          | 10.1021/acsomega.7b00535       | 4300                |                     | 200        |                        |                 |
| Zhang17-3     | <chem>OC1=C(O)C=CC(/C=C/C2=CC(C=CC=C3)=C3C=C2)=C1</chem>                | 10.1021/acsomega.7b00535       | 2200                |                     | 400        |                        |                 |
| Zhang17-4     | <chem>OC1=C(O)C=CC(/C=C/C2=CC(C=C(C=CC=C3)C3=C4)=C4C=C2)=C1</chem>      | 10.1021/acsomega.7b00535       | 1600                |                     | 100        |                        |                 |
| Zhang17-5     | <chem>OC1=C(O)C=CC(/C=C/C2=CC(C=CC3=C4C(C=C5)=CC=C3)=C4C5=C2)=C1</chem> | 10.1021/acsomega.7b00535       | 1300                |                     | 100        |                        |                 |
| Hseih2018b-01 | <chem>O=C1NC2=CC=CC=C2/C1=C/C=C/C3=CC=C(OC)C=C3</chem>                  | 10.1021/acsomega.7b01897       |                     | 125.8               | 42.6       | ThT                    |                 |
| Hseih2018b-02 | <chem>O=C1NC2=CC=CC=C2/C1=C/C=C/C3=CC=C(N(C)C)C=C3</chem>               | 10.1021/acsomega.7b01897       |                     | 27.6                | 4.8        | ThT                    |                 |
| Hseih2018b-03 | <chem>O=C1NC2=NC=CC=C2/C1=C/C=C/C3=CC=C(N(C)C)C=C3</chem>               | 10.1021/acsomega.7b01897       |                     | 15.3                | 5.5        | ThT                    |                 |
| Hseih2018b-04 | <chem>O=C(/C=C/C1=CC=C(OC)C=C1)C2=NC3=CC=CC=C3S2</chem>                 | 10.1021/acsomega.7b01897       |                     | 353                 | 29.7       | ThT                    |                 |

| Compound      | SMILES                                                                              | DOI                      | K <sub>d</sub> / nM | K <sub>i</sub> / nM | Error / nM | K <sub>i</sub> against | Two-site model? |
|---------------|-------------------------------------------------------------------------------------|--------------------------|---------------------|---------------------|------------|------------------------|-----------------|
| Hseih2018b-05 | <chem>O=C(/C=C/C1=CC=C(N(C)C)C=C1)C2=NC3=CC=C=C3S2</chem>                           | 10.1021/acsomega.7b01897 |                     | 906                 | 29.7       | ThT                    |                 |
| Hseih2018b-06 | <chem>O=C(/C=C/C1=CC=C([N+][O-])C=C1)C2=NC3=CC=CC=C3S2</chem>                       | 10.1021/acsomega.7b01897 |                     | 89                  | 26.9       | ThT                    |                 |
| Hseih2018b-07 | <chem>O=C(/C=C/C1=CC=C(OC)C=C1)C2=NC=CS2</chem>                                     | 10.1021/acsomega.7b01897 |                     | >500                |            | ThT                    |                 |
| Hseih2018b-07 | <chem>O=C(/C=C/C1=CC=C(OC)C=C1)C2=NC=CS2</chem>                                     | 10.1021/acsomega.7b01897 |                     | >500                |            | ThT                    |                 |
| Hseih2018b-08 | <chem>O=C(/C=C/C1=CC=C(N(C)C)C=C1)C2=NC=CS2</chem>                                  | 10.1021/acsomega.7b01897 |                     | 505                 | 49.5       | ThT                    |                 |
| Hseih2018b-09 | <chem>O=C(/C=C/C1=CC=C([N+][O-])C=C1)C2=NC=CS2</chem>                               | 10.1021/acsomega.7b01897 |                     | 404                 | 80.6       | ThT                    |                 |
| Hseih2018b-10 | <chem>COC(C=C1)=CC=C1C2=NC(C3=NC=CS3)=C2</chem>                                     | 10.1021/acsomega.7b01897 |                     | >1000               |            | ThT                    |                 |
| Hseih2018b-10 | <chem>COC(C=C1)=CC=C1C2=NC(C3=NC=CS3)=C2</chem>                                     | 10.1021/acsomega.7b01897 |                     | >1000               |            | ThT                    |                 |
| Hseih2018b-11 | <chem>COC(C=C1)=CC=C1/C=C/C2=NOC(C3=NC=CS3)=C2</chem>                               | 10.1021/acsomega.7b01897 |                     | 91.5                | 58.7       | ThT                    |                 |
| Hseih2018b-12 | <chem>COC(C=C1)=CC=C1C2=NC(C3=NC=CS3)=C2</chem>                                     | 10.1021/acsomega.7b01897 |                     | >1000               |            | ThT                    |                 |
| Hseih2018b-12 | <chem>COC(C=C1)=CC=C1C2=NC(C3=NC=CS3)=C2</chem>                                     | 10.1021/acsomega.7b01897 |                     | >1000               |            | ThT                    |                 |
| Hseih2018b-13 | <chem>COC(C=C1)=CC=C1/C=C/C2=NNC(C3=NC=CS3)=C2</chem>                               | 10.1021/acsomega.7b01897 |                     | 327                 | 76.4       | ThT                    |                 |
| SLM           | <chem>C([N+])(C=C1)=C2C(C=CC=C2)=C1/C=C/C3=CC4=C(C=C3)N(CCOCCOC)C5=C4C=CC=C5</chem> | 10.1021/acsomega.8b00475 | 11400               |                     |            |                        |                 |
| [125I]AAU     | <chem>[125I]C1=CC(C(/C(O2)=C/C3=CC=C(N)C=C3)=O)=C2C=C1</chem>                       | 10.1021/bc8003292        | 4.2                 |                     |            |                        |                 |
| Maya2009-09   | <chem>IC1=CC(C(/C(O2)=C/C3=CC=C(OC)C=C3)=O)=C2C=C1</chem>                           | 10.1021/bc8003292        |                     | 2.89                | 0.42       | [125I]AAU              |                 |
| Maya2009-14   | <chem>IC1=CC(C(/C(O2)=C/C3=CC=C(O)C=C3)=O)=C2C=C1</chem>                            | 10.1021/bc8003292        |                     | 1.28                | 0.29       | [125I]AAU              |                 |
| Maya2009-15   | <chem>IC1=CC(C(/C(O2)=C/C3=CC=C(OCCO)C=C3)=O)=C2C=C1</chem>                         | 10.1021/bc8003292        |                     | 1.05                | 0.06       | [125I]AAU              |                 |



| Compound   | SMILES                                                                                            | DOI                  | K <sub>d</sub> / nM | K <sub>i</sub> / nM | Error / nM | K <sub>i</sub> against | Two-site model? |
|------------|---------------------------------------------------------------------------------------------------|----------------------|---------------------|---------------------|------------|------------------------|-----------------|
| LNS        | <chem>[H]N1C(S(CC2=NC=CC(O)CC(F)(F)[18F])=C2C)=O)=NC3=CC=CC=C31</chem>                            | 10.1021/cn500103u    | 11                  |                     |            |                        |                 |
| NML        | <chem>CN1C(S(CC2=NC=CC(OC)C(F)(F)[18F])=C2C)=O)=NC3=CC=CC=C31</chem>                              | 10.1021/cn500103u    | 8.2                 |                     |            |                        |                 |
| IMSB       | <chem>O=C(O)C1=CC(/C=C/C2=CC=C(/C=C/C3=CC(C(O)=O)=C(OC)C=C3)C(I)=C2)=CC=C1OC</chem>               | 10.1021/ja0167147    | 0.73                |                     |            |                        |                 |
| Cui2a      | <chem>CN(C)C1=CC=C(/C=C(C#N)/C#N)C=C1</chem>                                                      | 10.1021/ja4052922    | 1950                |                     |            | 189                    |                 |
| Cui2b      | <chem>CN(C)C1=CC=C(/C=C/C=C(C#N)/C#N)C=C1</chem>                                                  | 10.1021/ja4052922    | 35.8                |                     |            | 2.5                    |                 |
| Cui2c      | <chem>CN(C)C1=CC=C(/C=C/C=C/C/C=C(C#N)/C#N)C=C1</chem>                                            | 10.1021/ja4052922    | 26.9                |                     |            | 3                      |                 |
| Kim05      | <chem>CN(C1=CC2=C(C=C1)C=C3C(OCC(/C=C(C#N)/C#N)=C3)=C2)C</chem>                                   | 10.1021/jacs.5b03548 | 44.6                |                     |            | 4.2                    |                 |
| QM-FN-SO3  | <chem>CN(C)C(C=C1)=CC=C1C2=CC=C(S2)/C=C/C3=C/C(C4=C(N3CCCS(=O)([O-])=O)C=CC=C4)=C(C#N)/C#N</chem> | 10.1021/jacs.8b12820 | 170                 |                     |            |                        |                 |
| [125I]ISB  | <chem>OC1=CC=C(/C=C/C2=CC=C(/C=C/C3=CC(C(O)=O)=C(O)C=C3)C([125I])=C2)C=C1C(O)=O</chem>            | 10.1021/jm010045q    | 0.15                |                     |            |                        |                 |
| [125I]IMSB | <chem>O=C(O)C1=CC(/C=C/C2=CC=C(/C=C/C3=CC(C(O)=O)=C(OC)C=C3)C([125I])=C2)=CC=C1OC</chem>          | 10.1021/jm010045q    | 0.73                |                     |            | 0.05                   |                 |
| [125I]TZPI | <chem>IC1=CC(SC(C2=CC=C(N3CCN(C)CC3)C=C2)=N4)=C4C=C1</chem>                                       | 10.1021/jm010045q    | 0.15                |                     |            | 0.03                   |                 |
| CG         | <chem>OC(C=C1)=C(C(O)=O)C=C1/N=N/C2=CC=C(C3=C=C(/N=N/C4=CC(C(O)=O)=C(O)C=C4)C=C3)C=C2</chem>      | 10.1021/jm010045q    |                     | 0.4                 | 0.1        | [125I]IMSB             |                 |
| IMSB       | <chem>O=C(O)C1=CC(/C=C/C2=CC=C(/C=C/C3=CC(C(O)=O)=C(OC)C=C3)C(I)=C2)=CC=C1OC</chem>               | 10.1021/jm010045q    |                     | 0.8                 | 0.2        | [125I]IMSB             |                 |
| ThT        | <chem>CN(C)C(C=C1)=CC=C1C2=[N+](C)C3=CC=C(O)C=C3S2</chem>                                         | 10.1021/jm010045q    |                     | >4000               |            | [125I]IMSB             |                 |
| TZDM       | <chem>IC1=CC(SC(C2=CC=C(N(C)C)C=C2)=N3)=C3C=C1</chem>                                             | 10.1021/jm010045q    |                     | >5000               |            | [125I]IMSB             |                 |



| Compound                      | SMILES                                                                                                                                                      | DOI                        | K <sub>d</sub> / nM | K <sub>i</sub> / nM | Error / nM | K <sub>i</sub> against  | Two-site model? |
|-------------------------------|-------------------------------------------------------------------------------------------------------------------------------------------------------------|----------------------------|---------------------|---------------------|------------|-------------------------|-----------------|
| TZDM                          | <chem>IC1=CC(SC(C2=CC=C(N(C)C)C=C2)=N3)=C3C=C1</chem>                                                                                                       | 10.1021/jm010045q          | 0.14                |                     | 0.05       |                         |                 |
| TZPI                          | <chem>IC1=CC(SC(C2=CC=C(N3CCN(C)CC3)C=C2)=N4)=C4C=C1</chem>                                                                                                 | 10.1021/jm010045q          |                     | >2000               |            | [ <sup>125</sup> I]IMSB |                 |
| Zhuang16a                     | <chem>BrC1=CC(SC(C2=CC=C(N(C)C)C=C2)=N3)=C3C=C1</chem>                                                                                                      | 10.1021/jm010045q          |                     | >3000               |            | [ <sup>125</sup> I]IMSB |                 |
| Zhuang16b                     | <chem>BrC1=CC(SC(C2=CC=C(N3CCN(C)CC3)C=C2)=N4)=C4C=C1</chem>                                                                                                | 10.1021/jm010045q          |                     | >2400               |            | [ <sup>125</sup> I]IMSB |                 |
| [ <sup>125</sup> I]Ono2005-11 | <chem>[125I]C1=CC(C(C=C(C2=CC=C(N(C)C)C=C2)O3)=O)=C3C=C1</chem>                                                                                             | 10.1021/jm050635e          | 17.4                |                     | 5.7        |                         |                 |
| [ <sup>125</sup> I]BOB-4      | <chem>COc1ccc(OCCc2ccc([125I])cc2)cc1</chem>                                                                                                                | 10.1021/jm5004396          | 0.56                |                     | 0.18       |                         |                 |
| [ <sup>18</sup> F]FPPDB       | <chem>CN(C)c1ccc(/N=N/c2nc3ccc(OCCOCCOCC[18F])cc3s2)cc1</chem>                                                                                              | 10.1021/ml200230e          | 45.4                |                     |            |                         |                 |
| FPPDB                         | <chem>CN(C)c1ccc(/N=N/c2nc3ccc(OCCOCCOCCF)cc3s2)cc1</chem>                                                                                                  | 10.1021/ml200230e          |                     | 20                  |            | ThS                     |                 |
| ZW800-1C                      | <chem>O=C(O)CCC1=CC=C(C2=C(/C=C/C3=[N+](CCC[N+])(C)(C)C)C4=C(C=C(S(=O)(O)=O)C=C4)C3)CCC/C2=C\C=C5N(CCC[N+])(C)(C)C)C(C=C(S(=O)(O)=O)C=C6)\5(C)C)C=C1</chem> | 10.1038/s41551-023-01003-7 | 78.9                |                     | 12.3       |                         |                 |
| TC                            | <chem>CCN(CC)C1=CC=C2C(OC(C(/C=C/C3=[N+])(C)C(C=CC=C4)=C4S3)=C2)=O)=C1</chem>                                                                               | 10.1038/srep23668          | 58.43               |                     |            |                         |                 |
| TP                            | <chem>C[N+](C(C=CC=C1)=C1S2)=C2/C=C/C3=CC=C4(C(C56)=C3C=CC5=CC=CC6)=CC4</chem>                                                                              | 10.1038/srep23668          |                     | >1000               |            |                         |                 |
| Fluselenamyl                  | <chem>FCCOC1=CC(N=C(/C=C\C2=CN=C(N(C)C)N=C2)[Se]3)=C3C=C1</chem>                                                                                            | 10.1038/srep35636          | 1.6                 |                     |            |                         |                 |
| Matsumura07                   | <chem>IC1=CC(SC(/N=N/C2=CC=C(N)C=C2)=N3)=C3C=C1</chem>                                                                                                      | 10.1039/c1md00034a         |                     | 6.4                 | 0.57       | ThS                     |                 |
| Matsumura08                   | <chem>IC1=CC(SC(/N=N/C2=CC=C(NC)C=C2)=N3)=C3C=C1</chem>                                                                                                     | 10.1039/c1md00034a         |                     | 5.08                | 0.45       | ThS                     |                 |
| Matsumura09                   | <chem>IC1=CC(SC(/N=N/C2=CC=C(N(C)C)C=C2)=N3)=C3C=C1</chem>                                                                                                  | 10.1039/c1md00034a         |                     | 8.42                | 0.08       | ThS                     |                 |

| Compound | SMILES                                                                                                                                                                                                        | DOI                | K <sub>d</sub> / nM | K <sub>i</sub> / nM | Error / nM | K <sub>i</sub> against | Two-site model? |
|----------|---------------------------------------------------------------------------------------------------------------------------------------------------------------------------------------------------------------|--------------------|---------------------|---------------------|------------|------------------------|-----------------|
| SB-13    | <chem>CNC1=CC=C(/C=C/C2=C=C(O)C=C2)C=C1</chem>                                                                                                                                                                | 10.1039/c1md00034a |                     | 81.2                | 1.53       | ThS                    |                 |
| ThS      | <chem>C[N+]1=C(C2=CC=C(N(C)C)C=C2)SC3=CC(C4=[N+](C)C5=CC=C(C)C(S(=O)([O-])=O)=C5S4)=CC=C31</chem>                                                                                                             | 10.1039/c1md00034a | 1000                |                     |            |                        |                 |
| T1       | <chem>O=C(OCCOCCOCCOCC[N+]1=CC=C(C2=CC(C3=C(C4=C(C)SC(C5=CC=NC=C5)=C4)CCC3)=C(C)S2)C=C1)/C(C#N)=C/C6=CC(C=C7)=C(C=C6)C=C7N8CCCC8</chem>                                                                       | 10.1039/c4cc07656g | 1300                |                     |            |                        |                 |
| T2       | <chem>O=C(OCCOCCOCCOCC[N+]1=CC=C(C2=CC(C3=C(C4=C(C)SC(C5=CC=[N+](CCOCCOCCOCCOC(/C(C#N)=C/C6=CC(C=C7)=C(C=C6)C=C7N8CCCC8)=O)C=C5)=C4)CCC3)=C(C)S2)C=C1)/C(C#N)=C/C9=CC(C=C%10)=C(C=C9)C=C%10N%11CCCC%11</chem> | 10.1039/c4cc07656g | 1100                |                     |            |                        |                 |
| EAU-1    | <chem>F[B-]1(N2C(C(/C=C/C3=CC=C(N(C)C)C=C3)=C4[N+]1=C(C)C=C4)=CC=C2C)F</chem>                                                                                                                                 | 10.1039/C4RA07754G | 322.8               |                     | 119.5      |                        |                 |
| EAU-2    | <chem>F[B-]1(N2C(C(/C=C/C3=CC=C(N(C)C)C=C3)=C4[N+]1=C(C)C=C4)=CC=C2/C=C/C5=CC=C(OC)C=C5)F</chem>                                                                                                              | 10.1039/C4RA07754G | 226.2               |                     | 127.1      |                        |                 |
| EAU-3    | <chem>F[B-]1(N2C(C(/C=C/C3=CC=C(N(C)C)C=C3)=C4[N+]1=C(/C=C/C5=CC=C(OC)C=C5)C=C4)=CC=C2/C=C/C6=CC=C(OC)C=C6)F</chem>                                                                                           | 10.1039/C4RA07754G | 320.1               |                     | 161.1      |                        |                 |
| EAU-4    | <chem>F[B-]1(N2C(C(COCCOCCOC)=C3[N+]1=C(C)C=C3C)=C(C)C=C2/C=C/C4=CC=C(N(C)C)C=C4)F</chem>                                                                                                                     | 10.1039/C4RA07754G | 48.6                |                     | 9.7        |                        |                 |
| EAU-5    | <chem>F[B-]1(N2C(C(COCCOCCOC)=C3[N+]1=C(/C=C/C4=C(C=N(C)C)C=C4)C=C3C)=C(C)C=C2/C=C/C5=CC=C(N(C)C)C=C5)F</chem>                                                                                                | 10.1039/C4RA07754G | 96.9                |                     | 41.9       |                        |                 |

| Compound | SMILES                                                               | DOI                | K <sub>d</sub> / nM | K <sub>i</sub> / nM | Error / nM | K <sub>i</sub> against | Two-site model? |
|----------|----------------------------------------------------------------------|--------------------|---------------------|---------------------|------------|------------------------|-----------------|
| BBTO-1   | <chem>CN(C)C1=CC=C(/C=C2C(NC(NC\2=O)=O)=O)C=C1</chem>                | 10.1039/c5cc03662c |                     | 333.1               | 38.7       |                        |                 |
| BBTO-2   | <chem>CN(C)C1=CC=C(/C=C/C=C2C(NC(NC\2=O)=O)=O)C=C1</chem>            | 10.1039/c5cc03662c |                     | 165.2               | 23.1       |                        |                 |
| BBTO-3   | <chem>CN(C)C1=CC=C(/C=C/C=C/C=C2C(NC(NC\2=O)=O)=O)C=C1</chem>        | 10.1039/c5cc03662c |                     | 22.1                | 5.6        |                        |                 |
| BBTOM-2  | <chem>CN(C)C1=CC=C(/C=C/C=C2C(N(C)C(N(C)\2=O)=O)=O)C=C1</chem>       | 10.1039/c5cc03662c |                     | 119.9               | 22.3       |                        |                 |
| BBTOM-3  | <chem>CN(C)C1=CC=C(/C=C/C=C/C=C2C(N(C)C(N(C)\2=O)=O)=O)C=C1</chem>   | 10.1039/c5cc03662c |                     | 13.7                | 4.6        |                        |                 |
| BBTOM-4  | <chem>CN(C)C1=CC=C(/C=C/C=C/C/C=C2C(N(C)C(N(C)\2=O)=O)=O)C=C1</chem> | 10.1039/c5cc03662c |                     | 28.8                | 9.3        |                        |                 |
| BBTOM-5  | <chem>CN(C)C1=CC=C(/C=C/C=C/C/C=C2C(N(C)C(N(C)\2=O)=O)=O)C=C1</chem> | 10.1039/c5cc03662c |                     | 21.3                | 6.3        |                        |                 |
| BBTS-2   | <chem>CN(C)C1=CC=C(/C=C/C=C2C(NC(NC\2=S)=O)=S)C=C1</chem>            | 10.1039/c5cc03662c |                     | 121                 | 16.7       |                        |                 |
| BBTS-3   | <chem>CN(C)C1=CC=C(/C=C/C=C/C=C2C(NC(NC\2=S)=O)=S)C=C1</chem>        | 10.1039/c5cc03662c |                     | 14.7                | 8.4        |                        |                 |
| DTM-0    | <chem>CN(C)C1=CC=C(/C=C(C#N)/C#N)S1</chem>                           | 10.1039/c5cc06628j | n                   |                     |            |                        |                 |
| DTM-1    | <chem>CN(C)C1=CC=C(/C=C/C=C(C#N)/C#N)S1</chem>                       | 10.1039/c5cc06628j | 811                 |                     | 76         |                        |                 |
| DTM-2    | <chem>CN(C)C1=CC=C(/C=C/C=C/C=C(C#N)/C#N)S1</chem>                   | 10.1039/c5cc06628j | 117                 |                     | 16         |                        |                 |
| DTM-3    | <chem>CN(C)C1=CC=C(/C=C/C=C/C=C(C#N)/C#N)S1</chem>                   | 10.1039/c5cc06628j | 327                 |                     | 44         |                        |                 |
| IDP-1    | <chem>IC1=CC=C(C(/C=C/C2=C=C(N(C)C)C=C2)=O)C=C1</chem>               | 10.1039/c6ra02710e | 12.88               |                     | 2.02       |                        |                 |
| IDP-2    | <chem>IC1=CC=C(C(/C=C/C=C/C2=CC=C(N(C)C)C=C2)=O)C=C1</chem>          | 10.1039/c6ra02710e | 37.14               |                     | 10.8       |                        |                 |
| IDP-3    | <chem>IC1=CC=C(C(/C=C/C=C/C=C/C2=CC=C(N(C)C)C=C2)=O)C=C1</chem>      | 10.1039/c6ra02710e | 13.35               |                     | 5.67       |                        |                 |



| Compound     | SMILES                                                                             | DOI                      | K <sub>d</sub> / nM | K <sub>i</sub> / nM | Error / nM | K <sub>i</sub> against  | Two-site model? |
|--------------|------------------------------------------------------------------------------------|--------------------------|---------------------|---------------------|------------|-------------------------|-----------------|
|              | <chem>F(F)(F)F)C=C3)C=C3\2=O)C=C1</chem>                                           |                          |                     |                     |            |                         |                 |
| Dai2022-7d   | <chem>CN(C)C1=CC=C(/C=C2CC(C=C(OCCOCCOC(C)C(F)(F)F)C=C3)=C3\2=O)C=C1</chem>        | 10.1111/cbdd.14162       | 384                 |                     | 56         |                         |                 |
| Probe3       | <chem>O=C(N(/C=C/C1=CC=C(N(C)C)C=C1)N=C2)C3=C2OC4=CC(CC(C(O)=O)C#N)=CC=C4O3</chem> | 10.1155/2018/1651989     | 350                 |                     | 30         |                         |                 |
| BF-227       | <chem>[18F]CCOC1=CC=C2C(O C(/C=C/C3=CN=C(N(C)C)S3)=N2)=C1</chem>                   | 10.1177/1536012118796297 | 15.7                |                     | 3.1        |                         |                 |
| BF-227       | <chem>[18F]CCOC1=CC=C2C(O C(/C=C/C3=CN=C(N(C)C)S3)=N2)=C1</chem>                   | 10.1177/1536012118796297 |                     | 12                  |            | [ <sup>3</sup> H]BF-227 |                 |
| BMB          | <chem>NC1=CC=C(/C=C/C(C=C2OC)=CC=C2/C=C/C3=C=C(N)C=C3)C=C1</chem>                  | 10.1177/1536012118796297 |                     | 76                  |            | [ <sup>3</sup> H]BF-227 |                 |
| BTA-1        | <chem>C1=CC=C(N=C(C2=CC=C(NC)C=C2)S3)C3=C1</chem>                                  | 10.1177/1536012118796297 |                     | 146                 |            | [ <sup>3</sup> H]BF-227 |                 |
| Clorgyline   | <chem>C1C1=CC=C(OCCCN(C)CC#C)C(Cl)=C1</chem>                                       | 10.1177/1536012118796297 |                     | >9000               |            | [ <sup>3</sup> H]BF-227 |                 |
| Florbetapir  | <chem>FCCOCCOCCOC1=NC=C(/C=C/C2=CC=C(NC)C=C2)C=C1</chem>                           | 10.1177/1536012118796297 |                     | 12                  |            | [ <sup>3</sup> H]BF-227 |                 |
| Flutafuranol | <chem>OC1=CC=C(C=C(C2=CC=C(NC)C=C2F)O3)C3=C1</chem>                                | 10.1177/1536012118796297 |                     | 42                  |            | [ <sup>3</sup> H]BF-227 |                 |
| Flutemetamol | <chem>OC1=CC=C(N=C(C2=CC=C(NC)C(F)=C2)S3)C3=C1</chem>                              | 10.1177/1536012118796297 |                     | 65                  |            | [ <sup>3</sup> H]BF-227 |                 |
| Josephson01  | <chem>CN(C)C1=NC=C(S1)/C=C/C2=NC(C=C3)=C(O2)C=C3OCCF</chem>                        | 10.1177/1536012118796297 |                     | 12                  |            | [ <sup>3</sup> H]BF-227 |                 |
| Josephson02  | <chem>CN(C)C1=NC=C(S1)/C=C/C2=NC(C=C3)=C(O2)C=C3OCCCF</chem>                       | 10.1177/1536012118796297 |                     | 9.01                |            | [ <sup>3</sup> H]BF-227 |                 |
| Josephson03  | <chem>CN(C)C1=NC=C(S1)/C=C/C2=NC(C=C3)=C(O2)C=C3OCCCCF</chem>                      | 10.1177/1536012118796297 |                     | 31                  |            | [ <sup>3</sup> H]BF-227 |                 |
| Josephson04  | <chem>CN(C)C1=NC=C(S1)/C=C/C2=NC(C=C3)=C(O2)C=C3OCCCCCF</chem>                     | 10.1177/1536012118796297 |                     | 28                  |            | [ <sup>3</sup> H]BF-227 |                 |
| Josephson05  | <chem>CN(C)C1=NC=C(S1)/C=C/C2=NC(C=C3)=C(O2)C=C3OCCCCCF</chem>                     | 10.1177/1536012118796297 |                     | 23                  |            | [ <sup>3</sup> H]BF-227 |                 |
| Josephson06  | <chem>CN(C)C1=NC=C(S1)/C=C/C2=NC(C=C3)=C(O2)C=C3OCCCCCF</chem>                     | 10.1177/1536012118796297 |                     | 27                  |            | [ <sup>3</sup> H]BF-227 |                 |

| Compound     | SMILES                                                                                            | DOI                          | K <sub>d</sub> / nM | K <sub>i</sub> / nM | Error / nM | K <sub>i</sub> against               | Two-site model? |
|--------------|---------------------------------------------------------------------------------------------------|------------------------------|---------------------|---------------------|------------|--------------------------------------|-----------------|
| Josephson07  | <chem>CN(C)C1=NC=C(S1)/C=C/C2=NC(C=C3)=C(O2)C=C3OCCOCF</chem>                                     | 10.1177/1536012118796297     |                     | 11                  |            | [ <sup>3</sup> H]BF-227              |                 |
| Josephson08  | <chem>CN(C)C1=NC=C(S1)/C=C/C2=NC(C=C3)=C(O2)C=C3OCCOCCOCF</chem>                                  | 10.1177/1536012118796297     |                     | 13                  |            | [ <sup>3</sup> H]BF-227              |                 |
| Josephson09  | <chem>CN(C)C1=NC=C(S1)/C=C/C2=NC(C=C3)=C(O2)C=C3OCCOCCOCCOCF</chem>                               | 10.1177/1536012118796297     |                     | 26                  |            | [ <sup>3</sup> H]BF-227              |                 |
| Josephson10  | <chem>CN(C)C1=NC=C(S1)/C=C/C2=NC(C=C3)=C(O2)C=C3OCCOCCOCCOCCOCF</chem>                            | 10.1177/1536012118796297     |                     | 18                  |            | [ <sup>3</sup> H]BF-227              |                 |
| Josephson11  | <chem>IC1=CC(OC(/C=C/C2=CN=C(N(C)C)S2)=N3)=C3C=C1</chem>                                          | 10.1177/1536012118796297     |                     | 223                 |            | [ <sup>3</sup> H]BF-227              |                 |
| Josephson12  | <chem>CN(C)C1=NC=C(S1)/C=C/C2=NC3=C(O2)C=CC(I)=C3</chem>                                          | 10.1177/1536012118796297     |                     | 96                  |            | [ <sup>3</sup> H]BF-227              |                 |
| Josephson13  | <chem>FC1=CC(OC(/C=C/C2=CC=CC=C2)=N3)=C3C=C1</chem>                                               | 10.1177/1536012118796297     |                     | 1247                |            | [ <sup>3</sup> H]BF-227              |                 |
| Josephson14  | <chem>FC1=CC2=C(OC(/C=C/C3=CC=CC=C3)=N2)C=C1</chem>                                               | 10.1177/1536012118796297     |                     | 528                 |            | [ <sup>3</sup> H]BF-227              |                 |
| Josephson15  | <chem>FC1=CC(OC(/C=C/C2=CN=CS2)=N3)=C3C=C1</chem>                                                 | 10.1177/1536012118796297     |                     | 1446                |            | [ <sup>3</sup> H]BF-227              |                 |
| PiB          | <chem>OC1=CC=C2C(SC(C3=CC=C(NC)C=C3)=N2)=C1</chem>                                                | 10.1177/1536012118796297     |                     | 77                  |            | [ <sup>3</sup> H]BF-227              |                 |
| RO-16-6491   | <chem>C1C1=CC=C(C(NCCN)=O)C=C1</chem>                                                             | 10.1177/1536012118796297     |                     | >9000               |            | [ <sup>3</sup> H]BF-227              |                 |
| ThS          | <chem>C[N+]1=C(C2=CC=C(N(C)C)C=C2)SC3=CC(C4=[N+](C)C5=CC=C(C)C(S(=O)([O-])=O)=C5S4)=CC=C31</chem> | 10.1177/1536012118796297     |                     | 2150                |            | [ <sup>3</sup> H]BF-227              |                 |
| [125I]SIL231 | <chem>[125I]/C=C/COC1=CC(SC2=CC([N+](O-))=O)=CC=C2N3)=C3C=C1</chem>                               | 10.1371/journal.pone.0055031 | 635                 |                     |            |                                      |                 |
| SIL22        | <chem>BrC1=CC(SC2=CC([N+](O-))=O)=CC=C2N3)=C3C=C1</chem>                                          | 10.1371/journal.pone.0055031 |                     | 102                 |            | [ <sup>125</sup> I]SIL2 <sup>3</sup> |                 |
| SIL26        | <chem>FCCOC1=CC(SC2=CC([N+](O-))=O)=CC=C2N3)=C3C=C1</chem>                                        | 10.1371/journal.pone.0055031 |                     | 103                 |            | [ <sup>125</sup> I]SIL2 <sup>3</sup> |                 |
| SIL3B        | <chem>O=[N+](C1=CC=C(N2)C(SC3=C2C=CC=C3)=C1)[O-]</chem>                                           | 10.1371/journal.pone.0055031 |                     | 71.5                |            | [ <sup>125</sup> I]SIL2 <sup>3</sup> |                 |

| Compound                  | SMILES                                                        | DOI                                | K <sub>d</sub> / nM | K <sub>i</sub> / nM | Error / nM | K <sub>i</sub> against               | Two-site model? |
|---------------------------|---------------------------------------------------------------|------------------------------------|---------------------|---------------------|------------|--------------------------------------|-----------------|
| SIL5                      | <chem>COC1=CC(SC2=CC([N+](O-))=O)=CC=C2N3)=C3C=C1</chem>      | 10.1371/journal.pone.0055031       |                     | 110                 |            | [ <sup>125</sup> I]SIL2 <sup>3</sup> |                 |
| [ <sup>125</sup> I]BF-180 | <chem>CNC(C=C1)=CC=C1/C=C/C2=NC3=C(O2)C=CC([125I])=C3</chem>  | 10.1385/JMN:24:2:247               | 10.6                |                     | 1.5        |                                      |                 |
| BF-133                    | <chem>FC1=CC=C(OC(/C=C/C2=CC=C(N(C)C)C=C2)=N3)C3=C1</chem>    | 10.1385/JMN:24:2:247               |                     | 3.4                 | 0.73       | [ <sup>125</sup> I]BF-180            |                 |
| BF-140                    | <chem>FC1=CC=C(OC(/C=C/C2=CC=C(N)C=C2)=N3)C3=C1</chem>        | 10.1385/JMN:24:2:247               |                     | 2.1                 | 0.18       | [ <sup>125</sup> I]BF-180            |                 |
| BF-145                    | <chem>FC1=CC=C(OC(/C=C/C2=CC=C(NC)C=C2)=N3)C3=C1</chem>       | 10.1385/JMN:24:2:247               |                     | 4.5                 | 1.9        | [ <sup>125</sup> I]BF-180            |                 |
| BF-151                    | <chem>FC1=CC=C(OC(C2=CC3=CC=C(N(C)C)C=C3C=C2)=N4)C4=C1</chem> | 10.1385/JMN:24:2:247               |                     | 5.3                 | 0.56       | [ <sup>125</sup> I]BF-180            |                 |
| [3H]PiB                   | <chem>OC1=CC=C(N=C(C2=CC=C(N([3H])C)C=C2)S3)C3=C1</chem>      | 10.1523/JNEUROSCI.0630-07.2007     | 0.71                |                     |            |                                      | Site 1          |
| [3H]PiB                   | <chem>OC1=CC=C(N=C(C2=CC=C(N([3H])C)C=C2)S3)C3=C1</chem>      | 10.1523/JNEUROSCI.0630-07.2007     | 19.8                |                     |            |                                      | Site 2          |
| BF-126                    | <chem>CN(C)C(C=C1)=CC=C1/C=C/C2=NC3=C(N2)C=CC=C3</chem>       | 10.1523/JNEUROSCI.1738-05.2005     |                     | 1.2                 | 0.68       | [ <sup>125</sup> I]BF-180            |                 |
| BF-158                    | <chem>CNC(C=C1)=CC=C1C2=NC3=CC=CC=C3C=C2</chem>               | 10.1523/JNEUROSCI.1738-05.2005     |                     | >5000               |            | [ <sup>125</sup> I]BF-180            |                 |
| BF-170                    | <chem>NC(C=C1)=CC=C1C2=NC3=CC=CC=C3C=C2</chem>                | 10.1523/JNEUROSCI.1738-05.2005     |                     | >5000               |            | [ <sup>125</sup> I]BF-180            |                 |
| [3H]BTA-1                 | <chem>C1=CC=C(N=C(C2=CC=C(NC[3H])C=C2)S3)C3=C1</chem>         | 10.1523/jneurosci.23-06-02086.2003 | 2.8                 |                     | 0.35       |                                      |                 |
| BF-124                    | <chem>CCN(CC)C(C=C1)=CC=C1/C=C/C2=NC3=C(S2)C=CC=C3</chem>     | 10.1523/JNEUROSCI.4456-03.2004     |                     | 10.9                | 2.2        | [ <sup>125</sup> I]BF-180            |                 |
| BF-125                    | <chem>CCN(CC)C(C=C1)=CC=C1/C=C/C2=NC3=C(O2)C=CC=C3</chem>     | 10.1523/JNEUROSCI.4456-03.2004     |                     | 4.9                 | 1.9        | [ <sup>125</sup> I]BF-180            |                 |
| BF-148                    | <chem>FC1=CC(OC(/C=C/C2=CC=C(N(C)C)C=C2)=N3)=C3C=C1</chem>    | 10.1523/JNEUROSCI.4456-03.2004     |                     | 4.2                 | 2.5        | [ <sup>125</sup> I]BF-180            |                 |
| BF-164                    | <chem>NC(C=C1)=CC=C1/C=C/C2=NC3=C(O2)C=CC=C3</chem>           | 10.1523/JNEUROSCI.4456-03.2004     |                     | 0.38                | 0.4        | [ <sup>125</sup> I]BF-180            |                 |

| Compound                  | SMILES                                                                                | DOI                                | K <sub>d</sub> / nM | K <sub>i</sub> / nM | Error / nM | K <sub>i</sub> against    | Two-site model? |
|---------------------------|---------------------------------------------------------------------------------------|------------------------------------|---------------------|---------------------|------------|---------------------------|-----------------|
| BF-165                    | <chem>CNC(C=C1)=CC=C1/C=C/C2=NC3=C(O2)C=C(O)C=C3</chem>                               | 10.1523/JNEUR<br>OSCI.4456-03.2004 |                     | 1.8                 | 0.2        | [ <sup>125</sup> I]BF-180 |                 |
| BF-168                    | <chem>CNC(C=C1)=CC=C1/C=C/C2=NC3=C(O2)C=C(OCF)C=C3</chem>                             | 10.1523/JNEUR<br>OSCI.4456-03.2004 |                     | 6.4                 | 1          | [ <sup>125</sup> I]BF-180 |                 |
| BF-169                    | <chem>CNC(C=C1)=CC=C1/C=C/C2=NC3=C(O2)C=CC=C3</chem>                                  | 10.1523/JNEUR<br>OSCI.4456-03.2004 |                     | 7.1                 | 1.2        | [ <sup>125</sup> I]BF-180 |                 |
| BF-180                    | <chem>CNC(C=C1)=CC=C1/C=C/C2=NC3=C(O2)C=CC(I)=C3</chem>                               | 10.1523/JNEUR<br>OSCI.4456-03.2004 | 10.6                |                     | 1.5        |                           |                 |
| BF-191                    | <chem>CIC(C=C1)=CC=C1/C=C/C2=NC3=C(O2)C=CC=C3</chem>                                  | 10.1523/JNEUR<br>OSCI.4456-03.2004 |                     | >5000               |            | [ <sup>125</sup> I]BF-180 |                 |
| BF-208                    | <chem>FC(C=C1)=CC=C1/C=C/C2=NC3=C(O2)C=CC=C3</chem>                                   | 10.1523/JNEUR<br>OSCI.4456-03.2004 |                     | >5000               |            | [ <sup>125</sup> I]BF-180 |                 |
| N-282                     | <chem>CN(C)C(C=C1)=CC=C1/C=C/C2=NC3=C(O2)C=CC=C3</chem>                               | 10.1523/JNEUR<br>OSCI.4456-03.2004 |                     | 4.3                 | 1.4        | [ <sup>125</sup> I]BF-180 |                 |
| BAP-2                     | <chem>F[B-]1(F)N2C(C=C3[N+]1=CC=C3)=C(C)C=C2/C=C/C4=CC=C(N(C)C)S4</chem>              | 10.2310/7290.2<br>013.00049        | 55                  |                     |            |                           |                 |
| BAP-3                     | <chem>F[B-]1(F)N2C(C=C3[N+]1=CC=C3)=C(C)C=C2/C=C/C4=CC=C(N(C)C)O4</chem>              | 10.2310/7290.2<br>013.00049        | 149                 |                     |            |                           |                 |
| BAP-4                     | <chem>F[B-]1(F)N2C(C=C3[N+]1=CC=C3)=C(C)C=C2/C=C/C4=CC=C(C5=CC=C(N(C)C)C=C5)S4</chem> | 10.2310/7290.2<br>013.00049        | 27                  |                     |            |                           |                 |
| BAP-5                     | <chem>F[B-]1(F)N2C(C=C3[N+]1=CC=C3)=C(C)C=C2/C=C/C4=CC=C(C5=CC=C(N(C)C)C=C5)O4</chem> | 10.2310/7290.2<br>013.00049        | 18                  |                     |            |                           |                 |
| BF-227                    | <chem>[18F]CCOC1=CC=C2C(OC/C=C/C3=CN=C(N(C)C)S3)=N2)=C1</chem>                        | 10.2967/jnumed.106.037556          |                     | 4.3                 | 1.5        | [ <sup>125</sup> I]BF-180 |                 |
| THK-5105                  | <chem>[18F]CC(O)COC1=CC=C(N=C(C2=CC=C(N(C)C)C=C2)C=C3)C3=C1</chem>                    | 10.2967/jnumed.112.117341          | 35.9                |                     |            |                           |                 |
| [ <sup>125</sup> I]DRM106 | <chem>[125I]C1=CN2C(C=C1)=NC(C3=CC=C(C4=NNC=C4)C=C3)=C2</chem>                        | 10.2967/jnumed.114.146944          | 10.1                |                     | 5.1        |                           |                 |



| Compound     | SMILES                                                                         | DOI                         | K <sub>d</sub> / nM | K <sub>i</sub> / nM | Error / nM | K <sub>i</sub> against | Two-site model? |
|--------------|--------------------------------------------------------------------------------|-----------------------------|---------------------|---------------------|------------|------------------------|-----------------|
| [125I]DRM106 | <chem>[125I]C1=CN2C(C=C1)=NC(C3=CC=C(C4=NNC=C4)C=C3)=C2</chem>                 | 10.2967/jnumed.114.146944   | 2890                |                     | 344.5      |                        |                 |
| Astemizole   | <chem>FC(C=C1)=CC=C1CN2C(NC3CCN(CCC4=CC=C(OC)C=C4)CC3)=NC5=CC=CC=C52</chem>    | 10.3233/JAD-2010-1262       |                     | 2.1                 | 0.1        |                        |                 |
| [125I]TZDM   | <chem>IC1=CC(SC(C2=CC=C(N(C)C)C=C2)=N3)=C3C=C1</chem>                          | 10.5012/bkcs.2008.29.9.1765 | 0.13                |                     |            |                        |                 |
| AH-2         | <chem>CN(C)C1=CC=C2C(C=CC(C3=[N+](C)C(C=CC=C4)=C4S3)=C2)=C1</chem>             | 10.7150/thno.68743          | 227                 |                     |            |                        |                 |
| PyrPEG       | <chem>CNC1=CC=C2C(OC(C3=NC=C(C4=CC5=C(C=C(OCCOCCOC)C=C5)O4)N=C3)=C2)=C1</chem> | acschemneuro.0c00211        | 63.8                |                     |            |                        |                 |
